# Supplementary material
Source: publisher figshare collection journal article supplement (https://gsapubs.figshare.com/ndownloader/files/23937422)
Supplement: Supplementary file 1 [file 23937422]

## Sheet: Analytical_Methods
Mesoproterozoic–Cretaceous provenance and paleogeographic evolution of the Northern Rockies: Insights from the detrital zircon record of the Bridger Range, MT, USA
GSA Data Repository Item 20XXxxx. Table DR1. Original sample information and U-Pb geochronologic analyses.
Analytical Settings for U-Pb Geochronology at the Arizona LaserChron Center (Element 2 Single Collector)
Laboratory and Sample Preparation
Laboratory name	Arizona LaserChron Center
Sample type/mineral	Zircon
Sample preparation	Conventional mineral separation, 1 inch epoxy mount, polished to 1-micron finish
Imaging	Hitachi 3400N SEM with BSE and/or Cathodoluminesence
Laser ablation system
Make, Model, and type	Photon Machines Analyte G2 Excimer laser
Ablation cell and volume	HelEx ablation cell
Laser wavelength	193 nm
Pulse width	~8 ns
Energy density	~7 J/cm2
Repetition rate	8 Hz
Alation duration	10 s
Ablation pit depth/ablation rate	~12 microns & 0.8 microns/sec
Spot diameter nominal/actual	20 microns
Sampling mode/pattern	Spot
Carrier gas	Helium
Cell carrier gas flow	0.11 L/min He in inner cup, 0.29 L/min He in cell
ICP-MS instrument
Make, Model, and type	Thermo Element2 HR ICPMS
Sample introduction	Ablation aerosol
RF power	1200 W
Make-up gas flow	0.8 L/min Ar
Detection system	Dual mode Secondary Electron Multiplier
Masses measured	202Hg, 204(Hg+Pb), 206Pb, 207Pb, 208Pb, 232Th, 235U, 238U
Dwell times (ms)	202=5.2, 204=7.8, 206=20.2, 207=28.4, 208=2.6, 232=2.6, 235=15.4, 238=10.4
Total integration time per output data point (sec)	202=1.5, 204=2.3, 206=5.9, 207=8.3, 208=7.6, 232=7.6, 235=4.5, 238=3.0
Sensitivity as useful yield	~5000 cps/ppm
IC dead time	22 ns
Data processing
Gas blank	8 sec on-peak zero subtracted
Calibration strategy	SLM zircon used as primary standard
Reference material information	Gehrels et al. (2008)
Data processing package used/Correction for LIEF	E2agecalc
Mass discrimination	Normalized to primary standard
Common Pb correction, composition and uncertainty	Common Pb correction based on measured 206Pb/204 Pb and the assumed composition of common Pb based on Stacey and Kramers (1975)
Uncertainty level and propagation	Uncertainties for individual analyses propagated at 1-sigma. Uncertainty of pooled analyses propagated at 2-sigma.
Quality control/validation	FC-1 and R33 analyzed as secondary standards.
Other information	Primary and secondary standards mounted together with unknowns.
	Analytical methods described by Gehrels et al. (2008), Gehrels and Pecha (2014), and Pullen et al. (2018)
Citations:
Gehrels, G.E., Valencia, V., Ruiz, J., 2008, Enhanced precision, accuracy, efficiency, and spatial resolution of U-Pb ages by laser ablation–multicollector–inductively coupled plasma–mass spectrometry: Geochemistry, Geophysics, Geosystems, v. 9, Q03017, doi:10.1029/2007GC001805.
Gehrels, G. and Pecha, M., 2014, Detrital zircon U-Pb geochronology and Hf isotope geochemistry of Paleozoic and Triassic passive margin strata of western North America: Geosphere, v. 10 (1), p. 49-65.
Pullen, A., Ibanez-Mejia, M., Gehrels, G., Giesler, D., and Pecha, M., 2018, Optimization of a Laser Ablation-Single Collector-Inductively Coupled Plasma-Mass Spectrometer (Thermo Element 2) for Accurate, Precise, and Efficient Zircon U-Th-Pb Geochronology: Geochemistry, Geophysics, Geosystems, v. 19. https://doi. org/10.1029/2018GC007889
Stacey, J., and Kramers, J., 1975, Approximation of terrestrial lead isotope evolution by a two-stage model: Earth and Planetary Science Letters, v. 26, p. 207 221.

## Sheet: Samples
Mesoproterozoic–Cretaceous provenance and paleogeographic evolution of the Northern Rockies: Insights from the detrital zircon record of the Bridger Range, MT, USA
GSA Data Repository Item 20XXxxx. Table DR1. Original sample information and U-Pb geochronologic analyses.
Sample_ID	Unit	Latitude (WGS84)	Longitude (WGS84)	Number of Analyses
Kk	Basal Kootenai Fm. Pryor Congl.	45.9103	-110.962	300
Jm	Morrison Formation	45.91	-110.962	276
Je	Jurassic Ellis Group, Swift s.s.	45.9095	-110.963	274
Cf	Flathead Sandstone	45.8945	-110.978	296
Yla	LaHood Formation	45.8942	-110.98	281
IPMa	Amsden Formation	45.8999	-110.96	303
IPq	Quadrant Quartzite	45.9014	-110.959	298
Mk	Snow Range Group - Kibbey Sandstone	45.9008	-110.961	105

## Sheet: ZrUPb
Mesoproterozoic–Cretaceous provenance and paleogeographic evolution of the Northern Rockies: Insights from the detrital zircon record of the Bridger Range, MT, USA
GSA Data Repository Item 20XXxxx. Table DR1. Original sample information and U-Pb geochronologic analyses.
				Isotope Ratios				Apparent Ages (Ma)
Sample_ID	206Pb_204Pb	U_ppm	U_Th	207Pb_235U	207Pb_235U_err	206Pb_238U	206Pb_238U_err	75Age	75Age_err	68Age	68Age_err	76Age	76Age_err	BestAge	BestAge_err
Kk	3016.69	93.3908	1.35322	0.1592	4.3429	0.0231249	1.57282	150.003	6.0562	147.375	2.29165	191.769	94.2021	147.375	2.29165
Kk	17980.8	122.649	2.24753	0.157784	1.88344	0.0236299	1.03694	148.761	2.60625	150.556	1.54309	120.232	37.0593	150.556	1.54309
Kk	4025.27	156.011	2.4917	0.150416	2.36613	0.0236777	1.44514	142.279	3.1413	150.858	2.1548	1.45	45.1513	150.858	2.1548
Kk	7098.07	214.026	1.43753	0.153534	1.73006	0.0238438	1.22112	145.028	2.33813	151.903	1.83324	33.9795	29.3671	151.903	1.83324
Kk	271743	361.925	1.53155	0.162494	1.8727	0.0239725	1.41322	152.884	2.65794	152.714	2.13282	155.522	28.747	152.714	2.13282
Kk	37440.4	647.159	3.22537	0.163373	1.83889	0.0242537	1.59802	153.651	2.6221	154.484	2.43934	140.854	21.3744	154.484	2.43934
Kk	6843.19	229.078	2.68694	0.156634	2.69593	0.0243553	1.03962	147.752	3.70707	155.123	1.59345	31.0101	59.5949	155.123	1.59345
Kk	30286.1	352.794	2.35026	0.165384	1.87684	0.0243943	1.48377	155.405	2.70447	155.368	2.27775	155.985	26.885	155.368	2.27775
Kk	21045.3	469.858	2.26264	0.161676	1.93914	0.0245149	1.54928	152.169	2.74033	156.127	2.3898	90.9415	27.6284	156.127	2.3898
Kk	21085.2	507.983	1.53912	0.163483	1.63921	0.0245609	1.29646	153.748	2.33872	156.417	2.00348	112.773	23.6488	156.417	2.00348
Kk	10242.2	610.047	1.63993	0.163616	1.71479	0.0247778	1.21443	153.863	2.44826	157.781	1.89287	93.9384	28.6607	157.781	1.89287
Kk	9978.49	561.311	0.803724	0.164054	1.83627	0.0248769	1.40077	154.245	2.62773	158.404	2.19184	90.8055	28.1473	158.404	2.19184
Kk	42207.2	860.067	1.42467	0.168531	1.67448	0.0249977	1.36198	158.143	2.45217	159.164	2.14124	142.863	22.8508	159.164	2.14124
Kk	6306.31	672.792	1.09033	0.181143	2.03113	0.025094	1.12613	169.044	3.16292	159.77	1.7771	300.927	38.5475	159.77	1.7771
Kk	210663	223.805	1.38731	0.169748	1.93256	0.0251205	1.34439	159.2	2.84758	159.937	2.12373	148.27	32.5344	159.937	2.12373
Kk	16346.3	621.283	0.91004	0.171699	1.75366	0.025224	1.47465	160.892	2.60932	160.588	2.33885	165.357	22.1705	160.588	2.33885
Kk	84420.4	530.24	2.86339	0.170149	1.80393	0.02536	1.43889	159.548	2.66341	161.443	2.29414	131.531	25.6056	161.443	2.29414
Kk	53961.7	430.495	0.958553	0.174524	1.50545	0.0257442	1.12788	163.337	2.27137	163.858	1.82483	155.805	23.3448	163.858	1.82483
Kk	25975.8	963.147	1.08085	0.176312	1.70179	0.0258905	1.46703	164.882	2.58998	164.777	2.3867	166.37	20.1307	164.777	2.3867
Kk	69608.4	792.623	2.68526	0.178385	1.88555	0.0263244	1.53422	166.67	2.89828	167.503	2.53676	154.883	25.6667	167.503	2.53676
Kk	70080.2	751.18	6.03108	0.193965	1.97851	0.0265937	1.36692	180.007	3.26363	169.194	2.28267	324.468	32.4665	169.194	2.28267
Kk	2836.95	184.644	2.71473	0.219871	5.82897	0.0343574	0.894775	201.802	10.6682	217.762	1.91594	19.1854	138.422	217.762	1.91594
Kk	35215	130.889	1.62021	0.241422	1.85927	0.0343731	1.09414	219.584	3.67139	217.86	2.34386	238.098	34.6694	217.86	2.34386
Kk	7263.04	205.626	1.046	0.238965	2.56852	0.0353634	1.09762	217.573	5.03028	224.029	2.41675	148.284	54.442	224.029	2.41675
Kk	50113.3	127.957	4.06108	0.244979	1.82618	0.0354256	0.98932	222.489	3.64874	224.416	2.18199	202.147	35.6454	224.416	2.18199
Kk	12086.7	100.033	2.81564	0.243692	1.79323	0.0354919	0.85496	221.44	3.56777	224.829	1.88906	185.553	36.7018	224.829	1.88906
Kk	20081.6	305.827	2.8387	0.245166	1.75997	0.0355747	1.32149	222.642	3.5186	225.344	2.92646	194.202	27.0232	225.344	2.92646
Kk	1389.53	30.2409	1.36724	0.189044	9.04689	0.0355955	1.35793	175.813	14.6058	225.474	3.00885	NA	NA	225.474	3.00885
Kk	9692.84	159.855	3.42054	0.240726	1.78188	0.0361332	1.04503	219.015	3.5104	228.82	2.3493	114.876	34.0578	228.82	2.3493
Kk	5463	103.534	2.6327	0.238561	1.77633	0.0363209	1.20086	217.242	3.47406	229.987	2.71314	81.2464	31.0687	229.987	2.71314
Kk	11627.4	178.785	1.44559	0.255019	1.72283	0.0364912	1.217	230.645	3.55465	231.047	2.76206	226.559	28.1966	231.047	2.76206
Kk	7126.94	150.633	2.73199	0.248731	2.65337	0.0365836	1.33341	225.545	5.36652	231.622	3.03363	162.616	53.6249	231.622	3.03363
Kk	6932.13	107.592	1.60019	0.242027	2.37816	0.0367772	1.33479	220.079	4.70551	232.826	3.05229	85.8846	46.6852	232.826	3.05229
Kk	12970.3	69.918	2.334	0.248652	1.96235	0.0372801	1.34625	225.481	3.96788	235.952	3.11907	117.616	33.6643	235.952	3.11907
Kk	104548	905.381	1.09913	0.261883	1.53914	0.0375842	1.32284	236.184	3.24339	237.841	3.08892	219.721	18.2036	237.841	3.08892
Kk	2323.26	118.27	1.43676	0.232121	1.98139	0.0377519	1.36183	211.948	3.7902	238.883	3.19364	NA	NA	238.883	3.19364
Kk	14284.5	255.993	2.32511	0.266049	1.9278	0.038262	1.51331	239.53	4.11343	242.051	3.59507	214.878	27.6599	242.051	3.59507
Kk	47123.8	629.36	1.36905	0.268312	1.83838	0.0385906	1.55262	241.344	3.94895	244.091	3.71895	214.697	22.7898	244.091	3.71895
Kk	5438.09	222.929	1.69481	0.259652	3.34629	0.0385913	1.26906	234.387	7.00394	244.096	3.03979	138.148	72.7417	244.096	3.03979
Kk	144899	358.021	1.48133	0.285976	1.9797	0.0390791	1.56957	255.387	4.47023	247.122	3.80535	331.965	27.353	247.122	3.80535
Kk	4399.88	152.011	1.35573	0.257394	1.60549	0.0391065	1.11812	232.564	3.33708	247.292	2.71266	86.2381	27.3082	247.292	2.71266
Kk	5925.7	132.813	3.1923	0.272999	2.98529	0.0399345	1.45416	245.089	6.50063	252.427	3.59977	175.356	60.8123	252.427	3.59977
Kk	15461.5	509.918	2.99327	0.281654	1.73742	0.0407255	1.37008	251.969	3.87688	257.328	3.45615	202.343	24.8015	257.328	3.45615
Kk	12896.1	137.264	1.88569	0.282202	2.16871	0.0409512	1.40427	252.403	4.84663	258.726	3.56127	194.064	38.4241	258.726	3.56127
Kk	4080.47	162.784	1.44487	0.272157	2.48809	0.0414986	1.37459	244.417	5.40479	262.116	3.53076	77.65	49.2791	262.116	3.53076
Kk	6252.36	169.147	2.63932	0.284674	2.93372	0.0422553	1.39176	254.358	6.60098	266.797	3.63739	141.172	60.6424	266.797	3.63739
Kk	4096.33	157.78	3.51868	0.278339	1.65363	0.0424271	1.03762	249.339	3.65594	267.86	2.72242	78.4401	30.5964	267.86	2.72242
Kk	1472.25	50.1928	1.30804	0.275274	3.49453	0.0442576	2.60051	246.902	7.6593	279.17	7.10488	NA	NA	279.17	7.10488
Kk	25438.2	561.885	1.16798	0.318738	1.55718	0.0455273	1.3135	280.931	3.8216	287.003	3.68711	230.66	19.3146	287.003	3.68711
Kk	25981.8	427.464	1.01067	0.322327	1.77635	0.045885	1.51318	283.691	4.39662	289.208	4.27952	238.443	21.4746	289.208	4.27952
Kk	23393.5	351.691	1.95183	0.321144	1.65303	0.0460664	1.38068	282.782	4.08003	290.326	3.91955	220.835	21.0429	290.326	3.91955
Kk	7724.92	90.7795	1.19212	0.333312	2.07062	0.0467801	1.38761	292.091	5.25597	294.723	3.99752	271.074	35.2425	294.723	3.99752
Kk	85226.9	239.149	1.61461	0.335276	1.87663	0.0474006	1.59863	293.586	4.78456	298.543	4.66378	254.332	22.6245	298.543	4.66378
Kk	3136.68	84.3365	2.57094	0.320422	2.55803	0.0484499	1.45404	282.227	6.30304	304.998	4.3315	97.5893	49.8093	304.998	4.3315
Kk	4868.67	80.8924	2.91477	0.33871	2.04773	0.0491816	1.34551	296.194	5.26075	309.495	4.06592	192.625	35.8748	309.495	4.06592
Kk	2042.74	54.4933	1.33775	0.315643	2.6421	0.0494666	1.71988	278.545	6.43639	311.246	5.22589	12.1454	48.2269	311.246	5.22589
Kk	6689.02	269.989	2.07796	0.353346	1.86025	0.0495308	1.05542	307.234	4.93169	311.64	3.21086	273.897	35.0946	311.64	3.21086
Kk	17724.3	300.866	4.50863	0.373561	1.44019	0.0519832	1.08115	322.289	3.97708	326.686	3.44397	290.616	21.7548	326.686	3.44397
Kk	102765	298.554	1.79817	0.398415	1.48322	0.0540766	1.23673	340.498	4.29081	339.501	4.09007	347.285	18.5083	339.501	4.09007
Kk	4858.84	56.4294	1.14538	0.396964	2.09058	0.0546495	1.08867	339.444	6.0321	343.004	3.63659	315.125	40.5969	343.004	3.63659
Kk	34302.6	361.286	3.09786	0.3957	1.61486	0.0552899	1.29265	338.525	4.64881	346.917	4.36589	281.301	22.1584	346.917	4.36589
Kk	17494.4	84.5623	1.10979	0.411848	1.66609	0.0566637	1.05829	350.205	4.93492	355.304	3.65839	316.512	29.2735	355.304	3.65839
Kk	2848.19	39.2652	1.76556	0.382634	2.49764	0.0569025	1.15187	328.974	7.01848	356.76	3.99777	136.803	52.0493	356.76	3.99777
Kk	9919.79	121.896	2.87742	0.419296	1.85933	0.0574227	1.37364	355.548	5.57748	359.932	4.80867	327.018	28.4454	359.932	4.80867
Kk	3401.56	675.331	1.81428	0.538728	3.6102	0.0590269	1.76352	437.585	12.8349	369.705	6.33638	812.535	65.8882	369.705	6.33638
Kk	55832	455.524	1.71912	0.441873	1.83103	0.0596914	1.48491	371.572	5.69772	373.748	5.392	358.002	24.1605	373.748	5.392
Kk	9389.33	202.368	0.913889	0.440547	1.51245	0.0608983	1.14453	370.638	4.69653	381.087	4.23525	305.79	22.5171	381.087	4.23525
Kk	52819.7	293.594	3.52119	0.460779	1.31127	0.061057	0.952108	384.8	4.19983	382.051	3.53184	401.346	20.1968	382.051	3.53184
Kk	18274.5	287.313	2.04055	0.458663	1.2238	0.0629981	0.882654	383.327	3.90732	393.833	3.37213	320.394	19.2844	393.833	3.37213
Kk	6014.56	169.732	9.85414	0.475341	1.61724	0.0634068	1.02877	394.871	5.29081	396.311	3.95432	386.432	28.0269	396.311	3.95432
Kk	5370.36	80.8226	2.34456	0.471479	1.89786	0.0641557	1.12792	392.21	6.17458	400.849	4.38355	341.586	34.5466	400.849	4.38355
Kk	52346.1	419.942	1.44736	0.488186	1.71818	0.064693	1.41114	403.673	5.7231	404.103	5.5274	401.192	21.9591	404.103	5.5274
Kk	49667.1	184	0.994585	0.478837	1.68985	0.0649558	1.22262	397.274	5.55585	405.694	4.80724	348.596	26.3548	405.694	4.80724
Kk	38486.2	95.5857	1.43049	0.514796	1.87173	0.0677246	1.30596	421.669	6.45894	422.433	5.33993	417.474	29.953	422.433	5.33993
Kk	2.87122e+06	346.463	1.69922	0.518874	1.81829	0.0687773	1.49342	424.399	6.30725	428.785	6.19526	400.623	23.2389	428.785	6.19526
Kk	13500.4	145.956	1.97337	0.504592	1.96385	0.0694381	1.29257	414.806	6.68754	432.769	5.41023	316.04	33.609	432.769	5.41023
Kk	35982.8	394.746	13.528	0.525611	1.61707	0.069681	1.24446	428.893	5.65698	434.233	5.22589	400.277	23.1358	434.233	5.22589
Kk	36199.8	520.423	3.96016	0.529375	1.53666	0.0697423	1.21617	431.395	5.40082	434.603	5.11127	414.277	20.9936	434.603	5.11127
Kk	18372.1	257.387	8.54719	0.534025	1.48713	0.0699076	1.1928	434.477	5.25668	435.599	5.02415	428.513	19.8017	435.599	5.02415
Kk	11159.3	197.864	1.35792	0.540787	1.69909	0.0721598	1.18889	438.943	6.05528	449.154	5.15819	385.717	27.2662	449.154	5.15819
Kk	10889.4	111.562	3.87049	0.542348	1.76268	0.0723048	1.18425	439.972	6.29367	450.027	5.14767	387.68	29.318	450.027	5.14767
Kk	10198.9	91.3285	181.36	0.559456	1.47089	0.073349	0.996691	451.172	5.35804	456.301	4.39068	425.098	24.1316	456.301	4.39068
Kk	30845.9	605.968	13.2502	0.604017	1.5107	0.0787951	1.23655	479.78	5.77634	488.927	5.82226	436.274	19.3346	488.927	5.82226
Kk	26113.9	106.496	3.43403	0.647775	2.09745	0.0814421	1.69873	507.108	8.37255	504.724	8.24683	517.854	27.0103	504.724	8.24683
Kk	14832.7	94.375	2.23706	0.660088	1.70995	0.0830623	1.13768	514.668	6.90384	514.375	5.62458	515.945	28.0325	514.375	5.62458
Kk	30831.3	169.018	2.56433	0.655682	1.53978	0.0831473	1.07118	511.969	6.19169	514.881	5.30082	499.006	24.3535	514.881	5.30082
Kk	85951.1	413.542	3.16999	0.67395	1.63129	0.0848918	1.417	523.112	6.66886	525.256	7.14771	513.74	17.7602	525.256	7.14771
Kk	30434.7	69.3655	0.876757	0.680308	1.81795	0.0871382	1.38778	526.96	7.47371	538.59	7.1707	476.873	25.9768	538.59	7.1707
Kk	31143.2	70.9728	1.09329	0.720876	2.01849	0.0894094	1.38758	551.184	8.58573	552.043	7.34125	547.655	32.032	552.043	7.34125
Kk	15183.5	108.55	1.16098	0.721482	1.43513	0.0919791	1.01974	551.541	6.1073	567.231	5.5371	487.244	22.283	567.231	5.5371
Kk	21425.9	81.5035	2.19948	0.749721	1.70579	0.0926654	1.36379	568.063	7.42154	571.281	7.45586	555.219	22.358	571.281	7.45586
Kk	55005.4	389.455	8.83152	0.887875	1.74408	0.0936344	1.49216	645.227	8.32886	576.996	8.23564	891.935	18.6341	576.996	8.23564
Kk	4148.76	51.7898	1.84759	0.720369	2.16938	0.0939468	1.48561	550.885	9.22383	578.837	8.22448	436.906	35.2055	578.837	8.22448
Kk	886555	222.982	1.74917	0.798695	1.63589	0.0954528	1.32541	596.092	7.37588	587.706	7.445	628.113	20.6726	587.706	7.445
Kk	3572	65.2218	2.57157	0.747895	1.76162	0.0962189	1.28435	567.003	7.65377	592.212	7.26714	467.148	26.7038	592.212	7.26714
Kk	140761	371.108	3.86664	0.802672	2.01812	0.0974235	1.78846	598.335	9.12452	599.292	10.235	594.709	20.2571	599.292	10.235
Kk	4817.09	42.3409	173.487	0.770616	1.97404	0.0977141	0.93139	580.116	8.72388	600.998	5.34463	499.189	38.3362	600.998	5.34463
Kk	32069	131.234	1.75597	0.817158	1.69088	0.0986644	1.34812	606.462	7.72083	606.577	7.80448	606.008	22.0547	606.577	7.80448
Kk	645010	32.0143	1.77567	0.828293	2.11468	0.0992399	1.07258	612.665	9.72805	609.953	6.24225	622.682	39.3116	609.953	6.24225
Kk	2626.2	21.8479	1.50094	0.756304	5.5825	0.0996337	1.2555	571.875	24.414	612.262	7.33321	414.394	121.648	612.262	7.33321
Kk	234939	237.583	1.33643	0.853082	1.36774	0.101234	1.08611	626.339	6.39346	621.638	6.43637	643.374	17.8691	621.638	6.43637
Kk	8879.01	154.316	1.05589	0.830329	1.45955	0.101578	1.05515	613.795	6.72322	623.65	6.27218	577.603	21.8974	623.65	6.27218
Kk	85860.8	204.861	3.9481	0.860254	1.41099	0.101606	1.15278	630.262	6.62544	623.813	6.85418	653.48	17.46	623.813	6.85418
Kk	48157.5	311.448	13.7219	0.919436	1.4094	0.10838	1.21479	662.062	6.8552	663.331	7.65736	657.721	15.3132	663.331	7.65736
Kk	6231.91	44.5282	3.31823	0.910667	1.68676	0.110089	0.97987	657.412	8.16331	673.265	6.26431	603.371	29.7306	673.265	6.26431
Kk	5532.2	146.328	1.4402	1.13499	4.46573	0.110321	1.58294	770.132	24.1102	674.61	10.1389	1058.21	84.0988	674.61	10.1389
Kk	22814.8	88.3125	1.00962	0.927165	1.64911	0.110909	1.23973	666.142	8.05611	678.024	7.97873	626.123	23.4532	678.024	7.97873
Kk	13502.4	132.965	0.65895	0.968293	1.24502	0.11215	0.934773	687.584	6.21911	685.22	6.07658	695.313	17.5324	685.22	6.07658
Kk	93989.5	306.451	38.8627	1.08225	3.63711	0.117286	2.45076	744.733	19.197	714.922	16.5844	835.391	56.0167	714.922	16.5844
Kk	11439.1	112.372	1.74316	1.42592	1.45026	0.148175	1.19415	899.844	8.65578	890.727	9.9345	922.32	16.934	922.32	16.934
Kk	18656.5	74.0927	3.95647	1.50184	1.71021	0.155642	1.26734	931.131	10.4246	932.511	11.0031	927.862	23.5979	927.862	23.5979
Kk	12306.8	158.926	2.1836	1.48627	1.83092	0.153295	1.30681	924.795	11.1139	919.407	11.1975	937.646	26.3146	937.646	26.3146
Kk	29321.1	90.1728	3.79307	1.51097	1.52162	0.15525	1.19315	934.83	9.29739	930.323	10.3364	945.448	19.325	945.448	19.325
Kk	53155.6	73.5057	2.54815	1.51601	1.36275	0.154881	1.02497	936.869	8.33767	928.268	8.86122	957.132	18.359	957.132	18.359
Kk	5789.12	19.7629	1.8948	1.64922	1.79898	0.168088	1.11978	989.254	11.3719	1001.57	10.3875	962.062	28.7612	962.062	28.7612
Kk	550393	15.779	3.38035	1.43984	2.36624	0.146465	1.46665	905.654	14.1798	881.118	12.0787	965.979	37.8956	965.979	37.8956
Kk	42684.9	145.832	2.31675	1.60235	1.33649	0.162515	1.07662	971.128	8.35595	970.737	9.70234	972.01	16.1705	972.01	16.1705
Kk	20877.6	271.854	4.15959	1.62532	1.89449	0.164373	1.58948	980.051	11.9097	981.035	14.4648	977.828	21.0063	977.828	21.0063
Kk	10317.5	43.3685	0.813674	1.6454	1.53624	0.16627	1.04427	987.786	9.70246	991.525	9.59726	979.507	22.9545	979.507	22.9545
Kk	66670.8	177.13	2.95583	1.61535	1.18985	0.162863	0.939945	976.186	7.4622	972.666	8.48622	984.096	14.8377	984.096	14.8377
Kk	16681.3	43.6449	2.80276	1.68522	2.04271	0.169858	1.503	1002.96	13.0178	1011.33	14.0679	984.734	28.1608	984.734	28.1608
Kk	11558.7	124.658	2.52645	1.68749	1.71293	0.170048	1.40339	1003.82	10.9215	1012.37	13.1481	985.167	19.9855	985.167	19.9855
Kk	98568.4	111.115	6.76004	1.68683	1.20289	0.169373	0.954331	1003.57	7.66825	1008.66	8.91064	992.489	14.8886	992.489	14.8886
Kk	11555.1	65.2142	3.68518	1.71329	1.70101	0.17189	1.35243	1013.52	10.9066	1022.51	12.7879	994.124	20.9668	994.124	20.9668
Kk	1.76402e+06	61.1501	3.20216	1.65408	1.47884	0.165812	1.17122	991.114	9.35848	988.997	10.7385	995.785	18.3483	995.785	18.3483
Kk	21152.5	258	4.2603	1.74797	1.42566	0.175047	1.04465	1026.41	9.2083	1039.86	10.032	997.842	19.7101	997.842	19.7101
Kk	18573.6	28.7316	2.02883	1.7004	1.48163	0.169699	1.05213	1008.68	9.47341	1010.45	9.83994	1004.83	21.1712	1004.83	21.1712
Kk	54752.6	270.052	12.3068	1.759	1.36711	0.175289	1.05155	1030.48	8.85032	1041.19	10.1102	1007.8	17.717	1007.8	17.717
Kk	27690.2	115.913	3.99919	1.72057	1.41627	0.171118	1.08447	1016.24	9.09494	1018.27	10.2148	1011.85	18.4477	1011.85	18.4477
Kk	12768.9	41.5478	4.70605	1.67219	1.62886	0.166166	1.14901	998.018	10.3502	990.954	10.5541	1013.55	23.3903	1013.55	23.3903
Kk	220021	62.8567	1.75476	1.70163	1.51817	0.168794	1.26886	1009.14	9.70966	1005.46	11.8127	1017.12	16.8849	1017.12	16.8849
Kk	35019.4	164.31	8.09759	1.68705	1.5332	0.167275	1.21189	1003.65	9.77451	997.078	11.1954	1018.01	19.0215	1018.01	19.0215
Kk	15530.8	42.3904	1.41771	1.77915	1.64046	0.176398	1.14118	1037.87	10.6638	1047.27	11.0309	1018.11	23.8554	1018.11	23.8554
Kk	41837.7	61.3013	2.13262	1.78119	1.62578	0.176599	1.34581	1038.61	10.5727	1048.37	13.0216	1018.12	18.4737	1018.12	18.4737
Kk	885660	92.9733	3.23074	1.68162	1.63878	0.166693	1.22865	1001.59	10.4351	993.863	11.3164	1018.54	21.9614	1018.54	21.9614
Kk	53243.1	611.712	9.24276	1.75926	1.44823	0.174372	1.23308	1030.58	9.37599	1036.16	11.8027	1018.74	15.3805	1018.74	15.3805
Kk	7381.67	26.9792	1.06539	1.69837	2.05125	0.168249	1.69308	1007.92	13.11	1002.46	15.7186	1019.8	23.4661	1019.8	23.4661
Kk	19351	66.1514	1.25777	1.80468	1.83217	0.178599	1.39533	1047.15	11.971	1059.32	13.6304	1021.84	24.0539	1021.84	24.0539
Kk	33077.7	296.757	4.75035	1.64099	1.42022	0.161419	1.17589	986.094	8.96059	964.66	10.5355	1034.09	16.1099	1034.09	16.1099
Kk	104112	156.064	2.2755	1.78648	1.53589	0.175614	1.24964	1040.54	9.99878	1042.97	12.0337	1035.43	18.057	1035.43	18.057
Kk	30367.8	215.32	1.49738	1.62858	2.79402	0.159873	2.5697	981.312	17.5789	956.071	22.8332	1038.2	22.1673	1038.2	22.1673
Kk	16940.3	90.7067	3.1828	1.77029	1.61231	0.173521	1.2314	1034.63	10.462	1031.48	11.7376	1041.26	21.0238	1041.26	21.0238
Kk	75479.6	228.234	4.29078	1.73704	1.74908	0.170213	1.45525	1022.37	11.2716	1013.28	13.6454	1041.84	19.6002	1041.84	19.6002
Kk	14336.7	82.0896	1.95941	1.83608	1.85331	0.179853	1.36551	1058.46	12.1835	1066.17	13.4185	1042.57	25.304	1042.57	25.304
Kk	91039.8	264.713	3.11957	1.7854	1.69243	0.174746	1.50083	1040.15	11.0155	1038.21	14.3918	1044.25	15.7984	1044.25	15.7984
Kk	33130	278.717	0.84713	1.81878	1.46112	0.177543	1.22015	1052.24	9.57301	1053.54	11.8592	1049.58	16.2216	1049.58	16.2216
Kk	37876.9	299.539	33.6766	1.85012	1.43236	0.18032	1.17276	1063.47	9.4413	1068.73	11.5497	1052.73	16.5873	1052.73	16.5873
Kk	217078	414.657	128.25	1.82482	2.04506	0.177731	1.75381	1054.42	13.415	1054.57	17.0615	1054.14	21.2073	1054.14	21.2073
Kk	34432.1	45.4533	2.10945	1.45882	1.56118	0.142044	1.03554	913.523	9.40528	856.208	8.30278	1054.71	23.5506	1054.71	23.5506
Kk	8259.12	22.8602	3.7475	1.7985	2.11926	0.174925	1.354	1044.91	13.8301	1039.19	12.9951	1056.92	32.8283	1056.92	32.8283
Kk	349318	419.104	1.2348	1.90122	1.48507	0.184185	1.22154	1081.52	9.88196	1089.8	12.2479	1064.89	16.9838	1064.89	16.9838
Kk	64878.2	192.395	1.65528	1.87309	1.50806	0.181428	1.25731	1071.62	9.98322	1074.77	12.4468	1065.24	16.7451	1065.24	16.7451
Kk	106012	76.6895	1.90613	1.75847	1.36212	0.170026	1.04647	1030.29	8.81704	1012.25	9.80312	1068.79	17.5096	1068.79	17.5096
Kk	12570.4	80.6445	1.48748	1.88989	1.81143	0.181999	1.56405	1077.54	12.0289	1077.89	15.5247	1076.84	18.3253	1076.84	18.3253
Kk	161745	88.456	2.14706	1.8239	1.47045	0.17522	1.17458	1054.09	9.64375	1040.81	11.2892	1081.69	17.7446	1081.69	17.7446
Kk	12785.3	79.3325	3.33751	2.03386	1.61457	0.193431	1.25115	1126.91	10.9908	1139.93	13.0725	1101.9	20.4098	1101.9	20.4098
Kk	8538.45	22.7029	1.1158	1.70611	2.14561	0.161651	1.51292	1010.83	13.7363	965.944	13.5718	1109.39	30.3877	1109.39	30.3877
Kk	845472	192.121	3.66945	1.93049	1.59373	0.182753	1.19144	1091.71	10.6608	1081.99	11.8675	1111.12	21.1409	1111.12	21.1409
Kk	19132.4	73.6511	2.71297	1.98909	1.5959	0.187922	1.04569	1111.81	10.7837	1110.11	10.6637	1115.17	24.0638	1115.17	24.0638
Kk	31587.9	84.4091	2.12057	1.87977	1.56839	0.177208	1.06369	1073.98	10.3955	1051.71	10.322	1119.48	22.9914	1119.48	22.9914
Kk	27166.8	58.4286	1.98287	1.97487	1.83703	0.186147	1.51007	1106.97	12.3834	1100.47	15.2769	1119.78	20.869	1119.78	20.869
Kk	26484.4	45.6403	2.01842	2.00803	1.48182	0.189163	1.16218	1118.23	10.0445	1116.84	11.9176	1120.91	18.3522	1120.91	18.3522
Kk	46866.1	675.708	7.37455	2.12445	1.60491	0.198238	1.35265	1156.78	11.0808	1165.85	14.426	1139.85	17.1701	1139.85	17.1701
Kk	28499.3	212.84	2.8879	2.09327	2.31144	0.195308	2.16152	1146.6	15.8838	1150.06	22.7677	1140.04	16.2761	1140.04	16.2761
Kk	16970.6	124.754	2.64566	1.97827	1.43356	0.18456	1.23762	1108.13	9.66901	1091.84	12.4304	1140.26	14.3685	1140.26	14.3685
Kk	39080.3	70.5886	3.94166	2.04936	2.09775	0.190958	1.65832	1132.08	14.316	1126.56	17.1407	1142.7	25.5401	1142.7	25.5401
Kk	199901	183.682	3.0708	2.01294	1.4998	0.187473	1.26774	1119.88	10.1747	1107.67	12.9022	1143.67	15.9216	1143.67	15.9216
Kk	56028	200.877	2.76166	2.04169	1.57421	0.19008	1.30693	1129.52	10.7296	1121.81	13.4565	1144.37	17.4317	1144.37	17.4317
Kk	17724.6	54.8157	2.56879	2.03739	1.44356	0.189092	1.1676	1128.09	9.83225	1116.45	11.9694	1150.53	16.837	1150.53	16.837
Kk	27448.9	243.091	3.85827	2.02631	1.63188	0.187467	1.27609	1124.38	11.095	1107.64	12.9868	1156.84	20.1981	1156.84	20.1981
Kk	25987	77.0768	3.81208	2.08034	1.57833	0.192016	1.30449	1142.35	10.8238	1132.29	13.5461	1161.48	17.6224	1161.48	17.6224
Kk	281249	253.691	1.65998	2.21114	1.45842	0.203916	1.24678	1184.57	10.1973	1196.32	13.6133	1163.16	15.0075	1163.16	15.0075
Kk	32027.5	93.1292	4.59043	2.05427	1.67166	0.189214	1.31746	1133.72	11.4169	1117.12	13.513	1165.62	20.3965	1165.62	20.3965
Kk	43160.4	159.474	2.3057	2.07011	1.57062	0.189804	1.30438	1138.97	10.7537	1120.31	13.4138	1174.7	17.3119	1174.7	17.3119
Kk	29019.2	102.829	2.18436	2.15418	1.29729	0.196935	0.93634	1166.4	8.99651	1158.83	9.93124	1180.5	17.7518	1180.5	17.7518
Kk	976782	604.406	7.15423	2.08661	1.51274	0.189245	1.33406	1144.41	10.3841	1117.28	13.685	1196.18	14.0489	1196.18	14.0489
Kk	40597.8	76.6387	4.08734	2.20108	1.4199	0.199492	1.15609	1181.39	9.91382	1172.59	12.3948	1197.51	16.2413	1197.51	16.2413
Kk	577428	174.126	3.19806	2.22073	1.42146	0.20072	1.12456	1187.6	9.95221	1179.19	12.1185	1202.93	17.1148	1202.93	17.1148
Kk	28532.6	274.449	2.17829	2.33065	1.20474	0.210272	0.894637	1221.68	8.56013	1230.27	10.0199	1206.53	15.8721	1206.53	15.8721
Kk	38050.2	83.8781	1.837	2.28933	1.60562	0.20407	1.33246	1209	11.3473	1197.15	14.5579	1230.25	17.5848	1230.25	17.5848
Kk	36522.3	192.56	5.96687	2.31263	1.797	0.205426	1.57685	1216.17	12.7389	1204.4	17.323	1237.08	16.9179	1237.08	16.9179
Kk	56558.9	231.717	3.58234	2.44679	1.33139	0.216308	1.06761	1256.48	9.59689	1262.34	12.2393	1246.45	15.5707	1246.45	15.5707
Kk	274726	69.6943	3.88034	2.3351	1.7818	0.204448	1.27296	1223.03	12.668	1199.17	13.9293	1265.38	24.3476	1265.38	24.3476
Kk	157022	124.678	3.87327	2.45937	1.33015	0.214574	1.04989	1260.18	9.60217	1253.14	11.9568	1272.2	15.9169	1272.2	15.9169
Kk	20239.9	144.535	2.33177	2.50521	1.44584	0.215038	0.926468	1273.54	10.4929	1255.6	10.57	1303.94	21.5614	1303.94	21.5614
Kk	5313.29	46.7447	3.33744	2.68106	1.51509	0.229133	1.16533	1323.25	11.2052	1329.95	14.0042	1312.39	18.784	1312.39	18.784
Kk	6804.17	49.3043	1.66034	2.5785	1.57966	0.218533	1.20212	1294.56	11.5579	1274.12	13.8979	1328.58	19.836	1328.58	19.836
Kk	18350.4	97.9099	2.88263	2.78981	1.38401	0.234143	1.06682	1352.81	10.3453	1356.18	13.0475	1347.48	17.0216	1347.48	17.0216
Kk	15183.5	137.336	3.74379	2.29041	2.53901	0.191131	2.31964	1209.33	17.9474	1127.5	23.9945	1358.53	19.9009	1358.53	19.9009
Kk	55125.2	136.153	3.34361	2.75606	1.35257	0.226805	1.04177	1343.73	10.0777	1317.73	12.4156	1385.35	16.5656	1385.35	16.5656
Kk	825153	272.455	4.5386	2.98488	1.3667	0.242439	1.01657	1403.77	10.3951	1399.37	12.7874	1410.45	17.4819	1410.45	17.4819
Kk	17515.9	62.1814	1.95805	2.93619	1.54508	0.237455	1.21016	1391.29	11.7033	1373.45	14.9698	1418.73	18.3633	1418.73	18.3633
Kk	34287.7	215.866	3.54159	3.09322	1.44899	0.249902	1.09267	1431.01	11.1188	1437.97	14.0833	1420.66	18.1872	1420.66	18.1872
Kk	151675	285.623	2.20251	3.08733	1.84795	0.249324	1.68775	1429.55	14.174	1434.99	21.7128	1421.44	14.3816	1421.44	14.3816
Kk	131249	308.733	1.57495	3.0296	1.79278	0.244266	1.51982	1415.11	13.6869	1408.84	19.2337	1424.54	18.163	1424.54	18.163
Kk	51834.6	145.237	1.86371	2.97733	1.35801	0.239712	1.21062	1401.85	10.3225	1385.2	15.0902	1427.24	11.7486	1427.24	11.7486
Kk	38639.7	201.28	2.40161	3.09958	1.4356	0.24878	1.21638	1432.59	11.0216	1432.18	15.6214	1433.18	14.5469	1433.18	14.5469
Kk	16053.5	69.5466	2.33587	2.98287	1.67673	0.239154	1.23401	1403.26	12.7513	1382.3	15.3529	1435.23	21.6522	1435.23	21.6522
Kk	15729.2	43.0765	2.3271	3.02677	2.11684	0.242598	1.62954	1414.39	16.1576	1400.19	20.5088	1435.83	25.7697	1435.83	25.7697
Kk	14463.9	19.4929	0.775689	3.00125	1.68041	0.24046	1.39484	1407.94	12.799	1389.09	17.4302	1436.56	17.8709	1436.56	17.8709
Kk	185262	584.62	3.93222	3.11394	1.17052	0.24942	1.04081	1436.14	8.99645	1435.49	13.3941	1437.09	10.2122	1437.09	10.2122
Kk	28007	71.6232	0.843318	3.02392	1.73409	0.24216	1.40726	1413.67	13.2327	1397.92	17.6856	1437.48	19.3204	1437.48	19.3204
Kk	213564	208.761	2.82813	3.08334	1.36675	0.24682	1.00772	1428.56	10.4795	1422.05	12.8599	1438.24	17.6034	1438.24	17.6034
Kk	321991	471.176	2.51678	3.15902	1.66398	0.251895	1.45748	1447.2	12.834	1448.24	18.9048	1445.67	15.2918	1445.67	15.2918
Kk	107208	196.202	2.46737	3.0941	1.50846	0.246463	1.27148	1431.23	11.576	1420.21	16.207	1447.63	15.4551	1447.63	15.4551
Kk	28872.7	86.617	1.18154	3.08119	1.55727	0.245214	1.17019	1428.02	11.9384	1413.75	14.8551	1449.35	19.5607	1449.35	19.5607
Kk	3474.89	1181	5.20007	1.26517	6.22269	0.100458	5.82669	830.229	35.3046	617.091	34.289	1453.7	41.5641	1453.7	41.5641
Kk	34420.1	208.76	2.96677	3.15647	1.77007	0.25059	1.49828	1446.58	13.6497	1441.52	19.3536	1454.01	17.931	1454.01	17.931
Kk	15837.2	76.4121	15.2262	3.03573	1.68665	0.238842	1.33697	1416.65	12.8831	1380.67	16.6163	1471.14	19.5178	1471.14	19.5178
Kk	26523.9	274.545	3.05354	2.75008	1.10738	0.213394	0.845738	1342.11	8.24592	1246.87	9.58814	1497.37	13.5211	1497.37	13.5211
Kk	14360.6	408.526	2.46111	3.02176	1.53537	0.232962	1.29466	1413.13	11.714	1350.01	15.7693	1509.6	15.5842	1509.6	15.5842
Kk	93561	359.073	5.99679	3.54792	1.35966	0.268135	1.1183	1537.97	10.7705	1531.33	15.2428	1547.1	14.5317	1547.1	14.5317
Kk	141585	22.9408	4.66531	3.80521	2.12888	0.284192	1.25366	1593.85	17.1194	1612.44	17.8846	1569.33	32.237	1569.33	32.237
Kk	15028.9	73.3733	1.89432	3.82076	1.38498	0.284939	1.0738	1597.13	11.1461	1616.19	15.3501	1572.05	16.3809	1572.05	16.3809
Kk	10157.8	42.1416	0.67955	3.57918	1.45895	0.266484	1.05989	1544.93	11.5794	1522.93	14.3764	1575.13	18.7685	1575.13	18.7685
Kk	81156.7	64.9518	1.3851	3.46061	1.2124	0.257504	1.00661	1518.29	9.55099	1477.06	13.2879	1576.23	12.6477	1576.23	12.6477
Kk	42156.7	212.027	2.45331	4.01356	1.3263	0.292409	1.08605	1636.95	10.7813	1653.56	15.8402	1615.66	14.1759	1615.66	14.1759
Kk	157982	442.856	1.70443	3.97526	1.74473	0.288205	1.57336	1629.16	14.1558	1632.55	22.6916	1624.76	14.025	1624.76	14.025
Kk	32584.1	116.416	2.28457	3.83683	1.43375	0.277491	1.09658	1600.51	11.5488	1578.72	15.355	1629.29	17.1698	1629.29	17.1698
Kk	59934.4	165.454	1.20806	3.94478	1.53667	0.284387	1.19133	1622.92	12.4482	1613.42	17.0046	1635.24	18.0286	1635.24	18.0286
Kk	25956.6	139.197	2.13215	4.004	1.54336	0.287546	1.30846	1635.01	12.5399	1629.25	18.8376	1642.4	15.1898	1642.4	15.1898
Kk	43524.2	82.4745	1.97428	4.03793	1.44587	0.287837	1.21128	1641.87	11.7676	1630.71	17.4522	1656.17	14.6252	1656.17	14.6252
Kk	362151	371.092	4.60972	4.14403	1.51583	0.293509	1.37785	1663.03	12.4	1659.04	20.1545	1668.05	11.6871	1668.05	11.6871
Kk	262372	417.916	3.29927	4.30979	1.58589	0.304588	1.44768	1695.24	13.0709	1714.02	21.7888	1672.07	11.9697	1672.07	11.9697
Kk	567700	279.607	4.21473	3.98006	1.68965	0.280168	1.50154	1630.14	13.7122	1592.21	21.184	1679.42	14.3116	1679.42	14.3116
Kk	460287	157.065	1.87917	4.12014	1.49094	0.289055	1.313	1658.31	12.1826	1636.8	18.9799	1685.63	13.037	1685.63	13.037
Kk	79214.1	99.5181	2.42042	4.21486	1.45885	0.294993	1.26316	1676.92	11.9729	1666.43	18.5491	1690.04	13.4628	1690.04	13.4628
Kk	24854.1	85.5692	3.62897	4.26501	1.49513	0.296278	1.19198	1686.64	12.2985	1672.83	17.5626	1703.83	16.6184	1703.83	16.6184
Kk	36407	69.9878	3.94199	4.38671	1.55585	0.30328	1.31508	1709.84	12.8658	1707.55	19.7278	1712.63	15.2912	1712.63	15.2912
Kk	34169	95.4251	4.46559	4.44111	1.46836	0.303749	1.15594	1720.04	12.1699	1709.87	17.361	1732.43	16.6122	1732.43	16.6122
Kk	148822	250.676	3.68844	4.41971	1.32045	0.301781	1.04122	1716.04	10.9342	1700.13	15.5602	1735.49	14.8925	1735.49	14.8925
Kk	31990.8	228.066	3.49147	4.55962	1.20086	0.310334	1.00024	1741.92	10.0005	1742.35	15.2711	1741.39	12.1774	1741.39	12.1774
Kk	171914	446.557	2.97759	4.58131	1.29252	0.309657	1.1949	1745.87	10.773	1739.02	18.2127	1754.08	9.01688	1754.08	9.01688
Kk	61770.5	100.604	4.35856	4.61452	1.40621	0.308527	1.1034	1751.9	11.7358	1733.46	16.7712	1773.96	15.9107	1773.96	15.9107
Kk	9342.58	62.9063	1.66602	4.67656	1.47661	0.312189	1.23997	1763.06	12.3526	1751.47	19.0174	1776.8	14.6285	1776.8	14.6285
Kk	1.21306e+06	538.613	16.4128	3.73628	1.79283	0.248783	1.54525	1579.18	14.3615	1432.19	19.8451	1781.46	16.5771	1781.46	16.5771
Kk	144923	76.7031	4.04357	4.67945	1.75634	0.310983	1.55689	1763.57	14.6946	1745.54	23.8077	1784.98	14.8168	1784.98	14.8168
Kk	242409	178.252	3.16974	4.71257	1.39918	0.312877	1.20122	1769.48	11.7206	1754.85	18.4541	1786.77	13.0743	1786.77	13.0743
Kk	13108.5	46.5751	1.50651	4.84829	1.53096	0.319791	1.17492	1793.32	12.8878	1788.71	18.3522	1798.67	17.8626	1798.67	17.8626
Kk	34429.8	82.0041	1.28866	4.85018	1.28793	0.319269	1.07774	1793.65	10.8425	1786.16	16.8134	1802.35	12.8269	1802.35	12.8269
Kk	47307.4	107.702	2.47895	5.02707	1.19005	0.330646	1.02182	1823.89	10.079	1841.51	16.3679	1803.82	11.0939	1803.82	11.0939
Kk	35725.1	45.1164	0.883002	4.83204	1.74802	0.316054	1.51439	1790.49	14.7068	1770.43	23.4447	1813.94	15.8563	1813.94	15.8563
Kk	27794.5	62.9358	1.69704	4.80039	1.29416	0.313729	1.12052	1784.97	10.8756	1759.03	17.2499	1815.41	11.7579	1815.41	11.7579
Kk	23952.7	86.1852	1.38435	4.87634	1.38975	0.318054	1.2135	1798.18	11.7105	1780.22	18.8768	1819.05	12.2942	1819.05	12.2942
Kk	428159	427.334	11.78	5.15167	1.69089	0.335915	1.45122	1844.67	14.379	1866.99	23.5236	1819.57	15.7502	1819.57	15.7502
Kk	30273.3	97.7549	1.94962	4.95583	1.64171	0.322679	1.41915	1811.82	13.8716	1802.8	22.3185	1822.19	14.9752	1822.19	14.9752
Kk	32321.8	170.637	1.94848	4.90388	1.29311	0.318667	1.07686	1802.92	10.9065	1783.21	16.7757	1825.78	12.983	1825.78	12.983
Kk	287244	177.428	1.15064	4.85809	1.62034	0.315445	1.3572	1795.02	13.6449	1767.44	20.9805	1827.19	16.0504	1827.19	16.0504
Kk	61839	145.784	2.17377	4.92943	1.27001	0.319917	1.02535	1807.31	10.7211	1789.32	16.0207	1828.1	13.5869	1828.1	13.5869
Kk	48922.1	174.094	2.2164	4.94686	1.55894	0.320991	1.34575	1810.29	13.1682	1794.57	21.0803	1828.42	14.267	1828.42	14.267
Kk	184563	74.4687	3.58478	4.92516	1.322	0.319346	0.889661	1806.58	11.1583	1786.54	13.8818	1829.77	17.7258	1829.77	17.7258
Kk	93781.5	42.4437	1.8518	4.89656	1.35403	0.317381	0.942627	1801.66	11.4174	1776.92	14.6396	1830.4	17.6192	1830.4	17.6192
Kk	34539	32.5665	1.2445	4.82604	1.35222	0.312731	0.943381	1789.45	11.374	1754.13	14.4878	1830.86	17.5592	1830.86	17.5592
Kk	19564.1	113.614	1.97111	4.84395	1.80925	0.313793	1.49093	1792.56	15.2284	1759.35	22.9559	1831.42	18.5761	1831.42	18.5761
Kk	148986	106.03	2.8922	5.04339	1.36456	0.32641	1.17684	1826.64	11.5633	1820.96	18.669	1833.11	12.5168	1833.11	12.5168
Kk	18885.3	56.2301	0.854212	4.96647	1.3055	0.32136	1.08352	1813.63	11.0345	1796.37	16.9874	1833.51	13.1962	1833.51	13.1962
Kk	38111.2	68.3048	2.11758	4.90294	1.62668	0.315871	1.36257	1802.76	13.7197	1769.53	21.0851	1841.4	16.0836	1841.4	16.0836
Kk	205608	58.2136	2.29187	4.99263	1.48615	0.321309	1.16348	1818.07	12.5726	1796.12	18.2388	1843.31	16.7335	1843.31	16.7335
Kk	67419.9	37.585	3.4069	5.05598	1.44466	0.325173	1.1467	1828.75	12.2473	1814.94	18.1388	1844.49	15.9001	1844.49	15.9001
Kk	53486.2	87.2502	2.28641	5.04538	1.71687	0.324071	1.4415	1826.97	14.5502	1809.58	22.7438	1846.84	16.8704	1846.84	16.8704
Kk	13815.2	28.215	1.02025	4.94237	1.64325	0.316759	1.33395	1809.52	13.8783	1773.88	20.6862	1850.81	17.3507	1850.81	17.3507
Kk	1.78838e+06	121.033	5.99937	4.75506	1.47358	0.30461	1.25165	1777	12.3632	1714.13	18.8394	1851.66	14.0595	1851.66	14.0595
Kk	35422.5	116.109	1.73989	5.2032	1.82306	0.331006	1.56917	1853.14	15.5282	1843.26	25.1563	1864.24	16.7528	1864.24	16.7528
Kk	175791	211.603	4.32406	5.25342	1.24819	0.333721	0.994522	1861.33	10.6476	1856.39	16.0417	1866.83	13.6109	1866.83	13.6109
Kk	34973.9	184.611	2.94756	5.41602	1.62182	0.342438	1.37797	1887.39	13.9019	1898.39	22.6594	1875.3	15.4182	1875.3	15.4182
Kk	35826.4	92.6308	1.33412	5.18699	1.4195	0.326521	1.17608	1850.48	12.0843	1821.5	18.6618	1883.21	14.3155	1883.21	14.3155
Kk	31894.4	52.2155	0.794382	5.29704	1.5313	0.333091	1.23631	1868.39	13.0801	1853.35	19.9136	1885.14	16.2699	1885.14	16.2699
Kk	77902.1	116.15	1.73639	5.38905	1.49414	0.335712	1.29612	1883.11	12.7973	1866.01	21	1902.02	13.357	1902.02	13.357
Kk	39059.5	70.0551	0.984267	5.52372	1.58975	0.341841	1.25908	1904.29	13.6685	1895.52	20.6774	1913.85	17.4169	1913.85	17.4169
Kk	9134.72	24.6862	0.359105	5.46116	1.4364	0.33753	1.15527	1894.51	12.3283	1874.78	18.7937	1916.19	15.3128	1916.19	15.3128
Kk	6254.25	26.2192	0.827376	5.43548	1.83816	0.334778	1.54752	1890.47	15.7654	1861.5	25.0211	1922.42	17.7829	1922.42	17.7829
Kk	15453.4	31.7159	1.26333	5.77221	1.50938	0.35079	1.13467	1942.25	13.0636	1938.37	18.9955	1946.38	17.793	1946.38	17.793
Kk	53590.8	255.64	2.19854	6.35265	1.53357	0.368132	1.24301	2025.75	13.4546	2020.6	21.5611	2030.99	15.8986	2030.99	15.8986
Kk	17764.4	78.561	0.975914	6.15386	1.44997	0.35538	1.14199	1997.92	12.6654	1960.24	19.3025	2037.11	15.8037	2037.11	15.8037
Kk	31849.1	53.9938	3.43656	6.48482	1.52039	0.373458	1.3275	2043.84	13.376	2045.65	23.2692	2042	13.102	2042	13.102
Kk	5887.96	17.2359	1.69319	6.34649	1.46776	0.364196	1.05437	2024.9	12.8754	2002.03	18.1456	2048.28	18.0383	2048.28	18.0383
Kk	36340.7	103.977	1.36506	6.4532	1.33045	0.368156	1.02414	2039.54	11.6972	2020.72	17.7654	2058.62	14.9846	2058.62	14.9846
Kk	30226.9	63.4899	1.22774	6.38988	1.34193	0.364203	1.07129	2030.88	11.7824	2002.06	18.437	2060.27	14.2565	2060.27	14.2565
Kk	6568.6	56.0172	2.93222	5.26829	2.06009	0.299545	1.27761	1863.74	17.5824	1689.05	18.9841	2064.57	28.4965	2064.57	28.4965
Kk	86178.4	114.067	2.36907	6.47005	1.53011	0.364811	1.30959	2041.84	13.4574	2004.94	22.5658	2079.3	13.9299	2079.3	13.9299
Kk	55265.3	98.5853	1.37051	6.64422	1.68835	0.368973	1.46687	2065.24	14.9017	2024.57	25.4867	2106.05	14.6709	2106.05	14.6709
Kk	81697.6	307.712	1.4991	7.04269	1.52313	0.386912	1.1962	2116.83	13.5435	2108.49	21.5123	2124.93	16.5131	2124.93	16.5131
Kk	34490	51.6185	0.512903	7.76239	1.43519	0.393359	1.10834	2203.86	12.9103	2138.39	20.1706	2265.3	15.7246	2265.3	15.7246
Kk	24321.6	278.584	4.10056	8.60627	1.29034	0.413719	0.94549	2297.22	11.7386	2231.9	17.8369	2355.82	14.9993	2355.82	14.9993
Kk	38718.8	133.708	2.6048	11.2149	1.42744	0.478623	1.18936	2541.16	13.3082	2521.26	24.8181	2557.06	13.2109	2557.06	13.2109
Kk	14587.5	34.9924	0.728147	10.9819	1.32082	0.466446	1.01701	2521.6	12.2927	2467.96	20.8535	2565.04	14.0951	2565.04	14.0951
Kk	149969	69.0462	1.87819	12.0365	1.35352	0.491537	1.1396	2607.25	12.6899	2577.32	24.21	2630.57	12.1359	2630.57	12.1359
Kk	114917	170.663	4.51469	11.9234	1.27615	0.484852	1.10288	2598.41	11.9557	2548.36	23.2153	2637.64	10.6618	2637.64	10.6618
Kk	34879.4	37.8872	1.41069	12.1685	1.47307	0.489456	1.19277	2617.48	13.8223	2568.32	25.2676	2655.72	14.3315	2655.72	14.3315
Kk	485724	79.003	3.06183	9.99336	1.57347	0.395643	1.34606	2434.17	14.5245	2148.94	24.5987	2681.97	13.4752	2681.97	13.4752
Kk	93389.1	91.1421	1.15662	12.8184	1.22899	0.505891	0.98438	2666.4	11.5764	2639.07	21.318	2687.18	12.1622	2687.18	12.1622
Kk	44438.7	95.602	1.71741	12.881	1.48085	0.506789	1.29403	2670.99	13.954	2642.91	28.0569	2692.3	11.8952	2692.3	11.8952
Kk	22095.6	94.1488	0.85128	13.0318	1.41454	0.506054	1.20277	2681.96	13.3402	2639.76	26.0531	2713.91	12.2783	2713.91	12.2783
Kk	60553.1	232.73	8.31963	14.1393	1.25021	0.520884	0.996291	2759.1	11.8565	2702.93	21.9964	2800.43	12.3576	2800.43	12.3576
Kk	3651.48	10.8855	3.49481	14.6572	1.43073	0.535195	1.2188	2793.25	13.6004	2763.3	27.3905	2814.93	12.2445	2814.93	12.2445
Kk	171319	100.679	2.7288	14.7009	1.37926	0.534021	1.16149	2796.08	13.1136	2758.37	26.0653	2823.39	12.1415	2823.39	12.1415
Kk	118019	143.904	1.29741	15.162	1.33664	0.539054	1.02508	2825.47	12.7329	2779.49	23.1449	2858.43	13.9621	2858.43	13.9621
Kk	65539.1	49.4408	2.84058	15.6219	1.47153	0.544254	1.25199	2853.96	14.0437	2801.23	28.445	2891.39	12.5458	2891.39	12.5458
Kk	24231	59.0798	0.84843	18.1352	1.40087	0.58267	1.04429	2996.94	13.4817	2959.63	24.7841	3022.05	14.9845	3022.05	14.9845
Kk	125443	111.869	2.02116	24.6307	1.48759	0.661645	1.22794	3293.69	14.5164	3273.54	31.5198	3305.97	13.1704	3305.97	13.1704
Jm	4914.92	99.5178	0.625975	0.145513	4.17073	0.0220977	1.51349	137.942	5.37956	140.9	2.10937	87.355	92.1573	140.9	2.10937
Jm	3880.21	55.598	0.885089	0.145795	2.76897	0.0234564	1.66802	138.192	3.57754	149.463	2.4644	NA	NA	149.463	2.4644
Jm	21065	146.277	0.627951	0.154751	1.88042	0.0236191	1.20284	146.098	2.55877	150.489	1.78917	75.3676	34.3437	150.489	1.78917
Jm	4699.31	127.586	0.386946	0.153825	2.25042	0.0239355	1.36816	145.283	3.04636	152.481	2.0617	29.3276	42.8183	152.481	2.0617
Jm	5877.16	466.992	3.29237	0.154291	1.97556	0.023985	1.60425	145.693	2.68131	152.792	2.42235	31.6288	27.6252	152.792	2.42235
Jm	11388.8	485.161	2.25992	0.159245	2.15573	0.0242503	1.61144	150.042	3.00688	154.462	2.45949	80.716	33.9785	154.462	2.45949
Jm	23207.9	243.32	3.18561	0.166884	1.89241	0.0244864	1.41841	156.711	2.7481	155.948	2.18545	168.236	29.2672	155.948	2.18545
Jm	14487.5	574.007	2.15213	0.164249	1.84212	0.0247346	1.46766	154.416	2.6388	157.509	2.28369	107.214	26.3057	157.509	2.28369
Jm	11360.9	664.661	3.6784	0.162813	2.04877	0.0248693	1.69582	153.163	2.91276	158.357	2.65273	73.5366	27.3352	158.357	2.65273
Jm	25114	739.617	3.00393	0.171845	1.67673	0.0252056	1.42112	161.019	2.49668	160.472	2.25235	169.054	20.7999	160.472	2.25235
Jm	30884.2	1234.46	2.73346	0.173221	1.81399	0.0252142	1.54027	162.21	2.71948	160.526	2.442	186.854	22.3242	160.526	2.442
Jm	20003.6	678.188	4.44922	0.174165	1.93518	0.0257112	1.57613	163.027	2.91463	163.65	2.54687	153.963	26.2737	163.65	2.54687
Jm	57338.2	467.523	1.88181	0.175335	1.96243	0.0261772	1.52636	164.038	2.97257	166.578	2.51001	127.552	29.0184	166.578	2.51001
Jm	21956.2	217.598	3.60263	0.179102	2.13409	0.0266748	1.46286	167.288	3.2915	169.703	2.45012	133.235	36.5313	169.703	2.45012
Jm	30266.8	414.169	3.08089	0.228806	2.03016	0.0332795	1.6576	209.213	3.83837	211.041	3.44157	188.651	27.2625	211.041	3.44157
Jm	5740.88	192.975	1.46503	0.234454	2.29593	0.0349557	1.56224	213.869	4.42766	221.49	3.40142	130.74	39.5743	221.49	3.40142
Jm	37730.3	161.894	2.55228	0.254992	1.7107	0.03615	1.07279	230.623	3.52931	228.925	2.41278	247.973	30.6995	228.925	2.41278
Jm	47078.9	387.052	1.35595	0.258461	1.64586	0.0367958	1.3416	233.426	3.43226	232.941	3.06934	238.291	22.0056	232.941	3.06934
Jm	8929.64	57.0817	1.8026	0.24116	2.46199	0.0369518	1.4275	219.37	4.85732	233.911	3.27923	66.0978	47.7354	233.911	3.27923
Jm	8326.54	139.48	2.3228	0.258904	2.1883	0.0379542	1.55617	233.783	4.56968	240.14	3.66824	170.332	35.9222	240.14	3.66824
Jm	55244.5	229.886	2.69645	0.269325	1.77944	0.0384976	1.42862	242.154	3.83371	243.513	3.414	228.969	24.4993	243.513	3.414
Jm	4586.11	161.043	2.04619	0.258125	2.85833	0.038934	1.71137	233.155	5.95463	246.222	4.13432	103.382	54.1085	246.222	4.13432
Jm	16712	332.982	1.99047	0.27647	1.77438	0.0392894	1.31187	247.853	3.90227	248.427	3.19704	242.405	27.5142	248.427	3.19704
Jm	3450.08	49.4225	1.23826	0.280065	4.45635	0.0409617	1.47568	250.709	9.90032	258.791	3.7433	175.717	98.1218	258.791	3.7433
Jm	35729.6	334.523	1.63482	0.289777	1.87569	0.0413672	1.57215	258.384	4.279	261.302	4.02591	231.968	23.6096	261.302	4.02591
Jm	7368.22	111.718	2.06165	0.28255	1.94365	0.0414953	1.31069	252.678	4.34783	262.095	3.36635	166.128	33.5162	262.095	3.36635
Jm	11406.3	204.047	2.53418	0.287004	1.87607	0.0419796	1.26987	256.198	4.24805	265.092	3.29805	175.551	32.1923	265.092	3.29805
Jm	841162	380.369	1.9467	0.302534	1.86732	0.0423033	1.24524	268.378	4.4039	267.094	3.25801	279.617	31.8463	267.094	3.25801
Jm	20306	517.065	1.80247	0.295765	1.97709	0.0423048	1.5231	263.087	4.58226	267.103	3.98511	227.465	29.1221	267.103	3.98511
Jm	31943.2	427.215	0.970864	0.302489	1.60948	0.0427985	1.2176	268.342	3.79536	270.156	3.22146	252.565	24.2211	270.156	3.22146
Jm	5378.7	255.845	2.25193	0.283484	3.29209	0.0430416	1.2353	253.417	7.38324	271.659	3.28607	87.823	72.3529	271.659	3.28607
Jm	33120.4	179.96	1.73674	0.311586	1.70852	0.043587	1.1653	275.409	4.12129	275.029	3.13749	278.667	28.6055	275.029	3.13749
Jm	28635.2	638.071	1.30075	0.317994	1.58041	0.0444772	1.30123	280.358	3.87175	280.525	3.57199	278.986	20.5339	280.525	3.57199
Jm	17426.8	630.215	1.35201	0.318798	2.24154	0.0445368	1.96082	280.978	5.50197	280.893	5.38953	281.706	24.8486	280.893	5.38953
Jm	32826.3	344.243	1.29215	0.315122	1.82631	0.0445934	1.44917	278.144	4.44346	281.242	3.98805	252.184	25.5876	281.242	3.98805
Jm	15594.9	301.574	16.7418	0.326206	1.8335	0.0455314	1.20239	286.665	4.57925	287.028	3.37548	283.704	31.6394	287.028	3.37548
Jm	4678.07	82.4337	1.29453	0.318962	2.9856	0.0457281	1.6966	281.104	7.33121	288.241	4.78258	222.141	56.8508	288.241	4.78258
Jm	40487.8	137.732	0.855616	0.347975	2.04074	0.047221	1.478	303.197	5.34918	297.438	4.29627	347.738	31.8215	297.438	4.29627
Jm	30447.9	531.217	2.54101	0.337728	2.30665	0.0477568	1.98794	295.449	5.91311	300.735	5.84113	253.884	26.9049	300.735	5.84113
Jm	6030.84	92.4547	1.87066	0.371471	3.40091	0.0492725	1.59169	320.743	9.35352	310.054	4.81829	399.091	67.3582	310.054	4.81829
Jm	39535.8	277.806	0.865522	0.367876	1.45934	0.0507574	1.10751	318.078	3.98513	319.17	3.44876	310.062	21.6352	319.17	3.44876
Jm	12027.4	389.627	0.967607	0.384283	1.57403	0.053709	1.24549	330.185	4.43681	337.253	4.09246	280.691	22.036	337.253	4.09246
Jm	74814.8	1414.58	2.9597	0.398969	1.77686	0.0540586	1.51688	340.9	5.14537	339.391	5.01499	351.183	20.8913	339.391	5.01499
Jm	422468	231.974	2.64611	0.403328	1.57377	0.0541022	1.09742	344.059	4.59276	339.658	3.63097	373.872	25.3697	339.658	3.63097
Jm	42186.4	305.369	1.07858	0.405515	1.65327	0.0545825	1.26363	345.64	4.84338	342.595	4.2161	366.14	24.0298	342.595	4.2161
Jm	39921.7	648.162	1.55379	0.401527	1.87432	0.054612	1.60687	342.755	5.45245	342.775	5.36409	342.625	21.8182	342.775	5.36409
Jm	11336.4	988.424	2.78022	0.427844	2.11841	0.0547897	1.91967	361.644	6.44541	343.861	6.42801	477.329	19.7971	343.861	6.42801
Jm	150209	394.829	5.77249	0.420771	1.93079	0.0563457	1.64886	356.602	5.80618	353.364	5.66965	377.712	22.5946	353.364	5.66965
Jm	14669.4	285.019	1.89116	0.426929	1.78962	0.0576595	1.35948	360.994	5.43688	361.376	4.77766	358.516	26.2579	361.376	4.77766
Jm	35321.2	528.92	1.62728	0.438725	2.04689	0.05858	1.74071	369.353	6.3379	366.984	6.20968	384.227	24.1964	366.984	6.20968
Jm	5576.53	193.408	2.35694	0.413797	1.69773	0.0586858	1.27073	351.606	5.04549	367.628	4.54086	247.087	25.9226	367.628	4.54086
Jm	14581.5	298.056	2.11952	0.434092	1.72059	0.059279	1.39508	366.078	5.2883	371.239	5.0328	333.502	22.8213	371.239	5.0328
Jm	18523.6	148.451	2.33225	0.436195	1.7615	0.0594203	1.4325	367.566	5.43229	372.099	5.17939	339.091	23.2178	372.099	5.17939
Jm	42048.8	538.71	23.8401	0.452542	2.00604	0.0601555	1.75513	379.058	6.34606	376.571	6.41998	394.254	21.7888	376.571	6.41998
Jm	8807.25	146.974	7.84296	0.443575	1.99956	0.0609073	1.59511	372.77	6.23874	381.141	5.90339	321.084	27.4073	381.141	5.90339
Jm	4300.16	227.734	1.49875	0.43034	3.72217	0.0609755	1.29112	363.418	11.3715	381.555	4.7834	249.231	80.3921	381.555	4.7834
Jm	85241.2	290.494	2.68204	0.465116	1.49948	0.062943	1.15392	387.81	4.83351	393.499	4.40487	354.02	21.6134	393.499	4.40487
Jm	30041.4	567.596	31.368	0.476794	1.90108	0.0631549	1.62326	395.871	6.23228	394.783	6.21607	402.204	22.1637	394.783	6.21607
Jm	38453.4	343.601	13.9469	0.476046	1.84942	0.063879	1.58558	395.356	6.05648	399.172	6.13721	373.079	21.4181	399.172	6.13721
Jm	1813.86	27.1711	0.917673	0.41163	2.98567	0.0642143	1.59576	350.048	8.84034	401.204	6.20709	23.2076	60.5449	401.204	6.20709
Jm	20066.7	198.101	4.88494	0.483329	1.8379	0.0647235	1.52853	400.354	6.08081	404.288	5.98988	377.691	22.9408	404.288	5.98988
Jm	136962	389.738	2.07175	0.508885	2.2362	0.0661399	1.98979	417.699	7.65793	412.858	7.95748	444.503	22.698	412.858	7.95748
Jm	151780	356.089	1.65545	0.507578	1.99087	0.066229	1.63028	416.819	6.80617	413.397	6.52796	435.785	25.445	413.397	6.52796
Jm	33656	284.289	2.01735	0.508255	1.40848	0.0663725	1.13273	417.275	4.81939	414.264	4.54491	433.933	18.6454	414.264	4.54491
Jm	12546.9	301.483	2.35997	0.497761	1.60283	0.0665654	1.10541	410.186	5.40878	415.43	4.44738	380.753	26.0911	415.43	4.44738
Jm	25030	477.601	2.24402	0.497232	1.8732	0.0666041	1.7228	409.827	6.3167	415.664	6.93509	377.058	16.5438	415.664	6.93509
Jm	55423.4	161.75	2.62684	0.510106	1.99732	0.0683961	1.55681	418.521	6.85073	426.486	6.42469	374.835	28.1482	426.486	6.42469
Jm	7083.93	112.952	1.87334	0.555027	1.97779	0.069621	1.23196	448.285	7.16793	433.872	5.16921	522.901	33.9518	433.872	5.16921
Jm	80241.9	597.98	2.13472	0.552863	1.66296	0.0708712	1.39846	446.87	6.01176	441.402	5.96625	475.135	19.8883	441.402	5.96625
Jm	7626.99	71.8664	1.68049	0.540827	2.75641	0.0711529	1.82962	438.97	9.82407	443.097	7.83464	417.361	46.0679	443.097	7.83464
Jm	6226.34	100.55	1.83929	0.531226	1.73894	0.0715164	1.13313	432.623	6.12574	445.285	4.87533	365.73	29.7193	445.285	4.87533
Jm	148761	206.582	1.80534	0.560855	1.55531	0.0718266	1.14691	452.083	5.67464	447.151	4.9546	477.218	23.2317	447.151	4.9546
Jm	7867.06	80.4283	1.28884	0.540596	1.64388	0.0720706	1.36161	438.817	5.8572	448.618	5.90072	387.699	20.6825	448.618	5.90072
Jm	7882.77	85.9034	1.15908	0.521528	1.97886	0.0721037	1.44888	426.172	6.8873	448.818	6.28161	305.462	30.722	448.818	6.28161
Jm	20894.7	144.083	1.36794	0.557086	1.77618	0.0721442	1.24793	449.628	6.45257	449.061	5.41324	452.505	28.0619	449.061	5.41324
Jm	78556	301.066	2.49603	0.560912	1.64429	0.0721849	1.33484	452.12	5.99969	449.306	5.79327	466.476	21.2665	449.306	5.79327
Jm	21015.1	104.491	1.70065	0.563176	1.50656	0.0729654	1.05803	453.592	5.51135	453.996	4.63818	451.518	23.8302	453.996	4.63818
Jm	6696.42	107.653	3.08742	0.648184	3.46638	0.0731808	1.63925	507.361	13.8429	455.291	7.20591	749.495	64.5315	455.291	7.20591
Jm	46539.2	342.809	1.67442	0.565325	1.46792	0.0738894	1.24556	454.987	5.38305	459.546	5.52467	431.998	17.3078	459.546	5.52467
Jm	10197.8	220.785	1.78248	0.57701	1.53254	0.0762457	0.959612	462.538	5.69371	473.674	4.38246	407.587	26.7387	473.674	4.38246
Jm	30686.1	248.974	2.0861	0.623758	1.68605	0.0795963	1.39361	492.2	6.57659	493.713	6.62354	485.158	20.9517	493.713	6.62354
Jm	22584.4	362.495	12.8536	0.650013	1.87976	0.082609	1.5578	508.487	7.51928	511.677	7.66276	494.145	23.1694	511.677	7.66276
Jm	3013.06	59.3342	1.87727	0.670569	3.48859	0.0835098	1.27232	521.058	14.2196	517.039	6.32148	538.697	71.0562	517.039	6.32148
Jm	3736.72	71.9729	3.07297	0.622084	1.64782	0.0836733	1.10462	491.153	6.41685	518.011	5.49818	367.746	27.5327	518.011	5.49818
Jm	29857.2	357.265	1.92135	0.68276	1.84031	0.0853996	1.54457	528.441	7.58182	528.272	7.83415	529.191	21.9023	528.272	7.83415
Jm	69146	346.53	2.6137	0.680126	1.4658	0.0855017	1.09203	526.85	6.02499	528.879	5.54494	518.05	21.473	528.879	5.54494
Jm	13557	233.555	2.09823	0.692872	1.60076	0.0868108	1.01622	534.525	6.65258	536.648	5.23269	525.495	27.135	536.648	5.23269
Jm	9118.51	132.275	0.816382	0.690325	2.1897	0.0877054	1.8265	532.996	9.0805	541.952	9.49408	494.838	26.6116	541.952	9.49408
Jm	87035.4	91.8844	1.05778	0.71981	1.77495	0.0882363	1.38555	550.555	7.5433	545.098	7.24209	573.185	24.1191	545.098	7.24209
Jm	13017.3	237.295	2.30037	0.696161	1.62251	0.0883732	1.24229	536.495	6.76185	545.909	6.50254	496.68	22.9754	545.909	6.50254
Jm	134143	435.418	1.25894	0.729595	1.8715	0.0886118	1.58893	556.316	8.01618	547.322	8.33763	593.293	21.4247	547.322	8.33763
Jm	11626.4	760.659	2.71067	0.80448	2.0716	0.0894446	1.54783	599.353	9.37804	552.251	8.192	781.805	28.9545	552.251	8.192
Jm	33076.2	756.217	2.21186	0.768881	1.40769	0.0900664	1.06995	579.121	6.21303	555.93	5.69891	671.19	19.5677	555.93	5.69891
Jm	20788.1	109.202	2.09528	0.739906	1.87317	0.0918094	1.45092	562.351	8.08848	566.229	7.86505	546.67	25.9018	566.229	7.86505
Jm	33398.7	422.314	3.49828	0.761658	1.59719	0.0918497	1.29902	574.966	7.01183	566.467	7.04447	608.683	20.0912	566.467	7.04447
Jm	15391	96.9596	2.46136	0.766445	1.65231	0.091928	1.21342	577.721	7.27963	566.93	6.5854	620.372	24.1988	566.93	6.5854
Jm	16010.3	31.5135	3.53061	0.733431	2.34215	0.0922502	1.61462	558.565	10.0626	568.832	8.79091	516.925	37.2572	568.832	8.79091
Jm	618078	82.8952	1.41543	0.756092	1.80807	0.0929091	1.37104	571.753	7.90463	572.719	7.51353	567.932	25.6725	572.719	7.51353
Jm	23480.3	240.607	1.6054	0.807706	1.77539	0.09306	1.37185	601.167	8.05487	573.609	7.52913	706.489	23.9734	573.609	7.52913
Jm	163062	441.576	1.549	0.75805	1.67173	0.093089	1.40147	572.884	7.31931	573.78	7.69389	569.351	19.8383	573.78	7.69389
Jm	126826	525.356	2.61369	0.76779	1.61579	0.0936368	1.39088	578.494	7.12578	577.01	7.6768	584.35	17.8311	577.01	7.6768
Jm	48568	214.705	1.51209	0.761283	1.83239	0.0946519	1.56281	574.75	8.04217	582.991	8.71121	542.275	20.9165	582.991	8.71121
Jm	14905.2	87.3951	1.38106	0.767339	1.9456	0.0948063	1.53176	578.235	8.5775	583.9	8.55084	556.048	26.1453	583.9	8.55084
Jm	30313.7	406.249	2.1251	0.777401	1.77825	0.0955168	1.5689	584	7.89753	588.082	8.81812	568.178	18.2035	588.082	8.81812
Jm	50819.1	320.734	3.48588	0.788255	1.40758	0.0955506	1.11209	590.182	6.30009	588.281	6.25256	597.501	18.6883	588.281	6.25256
Jm	39880.4	448.494	47.0646	0.82153	2.04138	0.0959587	1.79673	608.902	9.34874	590.682	10.1413	677.268	20.7119	590.682	10.1413
Jm	94751.5	351.86	3.51601	0.788771	1.52025	0.0968061	1.26651	590.475	6.80685	595.664	7.20612	570.6	18.3095	595.664	7.20612
Jm	1.96827e+06	152.988	0.792434	0.78398	1.76275	0.0968408	1.20099	587.751	7.86583	595.868	6.83552	556.503	28.1432	595.868	6.83552
Jm	41427.9	105.347	1.97818	0.805033	1.99991	0.0970653	1.60994	599.664	9.05691	597.188	9.18248	609.016	25.6712	597.188	9.18248
Jm	17135.8	401.765	2.3265	0.778383	1.90008	0.0971172	1.51199	584.561	8.4446	597.492	8.62803	534.664	25.2073	597.492	8.62803
Jm	1358.99	35.8375	2.23236	0.681155	2.37869	0.0971619	1.53784	527.472	9.78631	597.755	8.77918	233.833	41.8643	597.755	8.77918
Jm	44293	293.443	5.77229	0.802079	1.62555	0.0976344	1.26884	598.001	7.34652	600.531	7.2756	588.398	22.0225	600.531	7.2756
Jm	465249	497.693	17.0558	0.814004	2.45367	0.0977012	2.23367	604.698	11.1802	600.923	12.816	618.851	21.9375	600.923	12.816
Jm	16047.7	55.0099	0.961332	0.805381	1.98983	0.0989901	1.59352	599.86	9.01343	608.488	9.25282	567.4	25.9503	608.488	9.25282
Jm	138458	382.704	2.10793	0.827563	1.69013	0.099166	1.49184	612.259	7.77119	609.519	8.67642	622.386	17.1549	609.519	8.67642
Jm	46109.9	81.2072	2.00047	0.834318	1.91128	0.0992015	1.47388	616.005	8.8272	609.728	8.57475	639.167	26.1868	609.728	8.57475
Jm	12734.5	159.539	0.910472	0.816661	1.8011	0.0996694	1.26514	606.184	8.2214	612.471	7.3919	582.729	27.8166	612.471	7.3919
Jm	13590.6	159.85	2.25397	0.814611	1.71478	0.100127	1.38791	605.038	7.81655	615.155	8.14311	567.341	21.9373	615.155	8.14311
Jm	33784.2	148.58	1.27603	0.83362	1.70156	0.101386	1.25702	615.619	7.85499	622.526	7.4593	590.316	24.8503	622.526	7.4593
Jm	1.80421e+07	203.171	1.25499	0.856094	1.53306	0.101571	1.12975	627.988	7.17988	623.611	6.71521	643.807	22.2916	623.611	6.71521
Jm	7694.19	185.404	0.804369	0.810606	1.56552	0.101853	1.29677	602.794	7.11673	625.261	7.72739	519.166	19.2296	625.261	7.72739
Jm	29306.9	164.884	0.970059	0.8458	1.79468	0.102184	1.35471	622.341	8.35044	627.193	8.09638	604.72	25.4662	627.193	8.09638
Jm	21057.3	189.643	1.25233	0.85283	1.68682	0.104088	1.19669	626.201	7.88377	638.32	7.27268	582.644	25.8086	638.32	7.27268
Jm	37126.6	435.107	1.81845	0.868568	1.83576	0.104504	1.52092	634.79	8.66464	640.751	9.27664	613.6	22.2179	640.751	9.27664
Jm	11214.9	164.419	15.0701	0.866933	1.86061	0.106713	1.15114	633.901	8.77311	653.629	7.15529	564.144	31.8632	653.629	7.15529
Jm	8792.56	137.463	4.20496	1.06879	1.64503	0.112404	1.36109	738.145	8.62959	686.693	8.86591	897.579	19.0819	686.693	8.86591
Jm	22573.7	267.969	2.51967	1.06098	1.63524	0.116972	1.30766	734.305	8.54779	713.114	8.82783	799.499	20.5942	713.114	8.82783
Jm	26359	244.05	0.966776	1.04008	1.4034	0.119078	1.20212	723.956	7.26506	725.254	8.24587	719.915	15.3872	725.254	8.24587
Jm	8332.45	115.783	1.13009	1.14601	3.02089	0.124669	2.45076	775.357	16.3817	757.382	17.5127	827.474	36.8679	757.382	17.5127
Jm	33662.7	594.79	11.0226	1.17074	1.79843	0.126365	1.50973	786.99	9.84896	767.097	10.9186	843.812	20.3486	767.097	10.9186
Jm	9038.78	45.7029	0.667929	1.17797	2.03193	0.132	1.28274	790.365	11.1593	799.263	9.64237	765.326	33.1852	799.263	9.64237
Jm	34211.5	105.384	4.25639	1.57995	1.61737	0.162626	1.23322	962.35	10.0574	971.356	11.1202	941.83	21.4427	941.83	21.4427
Jm	14759.2	114.723	0.871012	1.57682	1.78279	0.162093	1.3677	961.118	11.0776	968.396	12.298	944.498	23.4121	944.498	23.4121
Jm	33918	90.0081	3.40355	1.56073	1.48437	0.160037	1.1381	954.758	9.18644	956.982	10.1215	949.618	19.4927	949.618	19.4927
Jm	85172.9	356.893	4.94884	1.40189	1.87941	0.143422	1.56363	889.736	11.1386	863.985	12.6434	954.277	21.3383	954.277	21.3383
Jm	11960.6	58.5329	2.34544	1.54958	1.4963	0.158011	0.860594	950.325	9.23432	945.714	7.56992	961.038	25.0216	961.038	25.0216
Jm	31864.3	37.9034	1.19607	1.62366	1.98636	0.165267	1.41699	979.407	12.4824	985.978	12.9552	964.696	28.438	964.696	28.438
Jm	10223.6	103.321	0.988424	1.61226	1.57944	0.164025	1.26708	974.985	9.89841	979.108	11.5099	965.722	19.2317	965.722	19.2317
Jm	9908.61	32.4756	4.81075	1.60906	1.74214	0.163082	1.18574	973.741	10.9098	973.883	10.7178	973.401	26.0214	973.401	26.0214
Jm	313980	81.4977	1.83363	1.67138	1.86055	0.168957	1.40326	997.712	11.8204	1006.36	13.0748	978.733	24.8914	978.733	24.8914
Jm	5143.92	73.1703	3.22147	1.61943	1.55681	0.163232	1.25171	977.771	9.77313	974.71	11.323	984.672	18.829	984.672	18.829
Jm	549052	698.359	2.32414	1.51509	1.88396	0.152216	1.56036	936.498	11.524	913.374	13.2883	991.313	21.4696	991.313	21.4696
Jm	10189	116.084	5.82879	1.66479	1.62304	0.167114	1.25358	995.202	10.296	996.191	11.571	993.008	20.9479	993.008	20.9479
Jm	28493.3	187.786	2.8343	1.71384	1.65395	0.171738	1.13657	1013.72	10.6061	1021.68	10.7386	996.558	24.4169	996.558	24.4169
Jm	18977.9	76.7186	2.78705	1.73124	1.86871	0.172886	1.46877	1020.21	12.0279	1027.99	13.9565	1003.54	23.4317	1003.54	23.4317
Jm	8679.08	26.7411	0.959592	1.7006	1.84184	0.169808	1.28895	1008.76	11.7772	1011.05	12.0614	1003.75	26.7057	1003.75	26.7057
Jm	108607	68.4677	3.16853	1.64629	1.57009	0.16437	1.24987	988.129	9.91832	981.016	11.3741	1003.94	19.2675	1003.94	19.2675
Jm	23081.2	173.775	2.98343	1.73629	1.60288	0.173278	1.21027	1022.09	10.3277	1030.15	11.5224	1004.85	21.3121	1004.85	21.3121
Jm	27144	38.5699	1.28745	1.73231	1.79258	0.172633	1.2136	1020.61	11.5404	1026.6	11.5174	1007.76	26.7422	1007.76	26.7422
Jm	12970.7	107.745	2.89013	1.69223	1.71234	0.168614	1.44985	1005.61	10.9291	1004.47	13.4854	1008.06	18.4613	1008.06	18.4613
Jm	38222.4	411.927	13.1316	1.66977	2.06441	0.166281	1.80068	997.097	13.1109	991.588	16.5499	1009.21	20.4568	1009.21	20.4568
Jm	20433.3	46.2399	1.51996	1.71753	2.05279	0.170931	1.67773	1015.1	13.1743	1017.24	15.7882	1010.47	23.9655	1010.47	23.9655
Jm	22066	196.196	4.33518	1.69509	1.49962	0.168448	1.16669	1006.68	9.57731	1003.55	10.8425	1013.48	19.076	1013.48	19.076
Jm	201324	252.045	18.4779	1.75541	1.55203	0.173791	1.21346	1029.16	10.0401	1032.96	11.5819	1021.06	19.5884	1021.06	19.5884
Jm	77667.6	242.491	2.40948	1.66955	1.42327	0.16512	1.21019	997.017	9.03836	985.169	11.0561	1023.15	15.1601	1023.15	15.1601
Jm	180491	110.723	2.25681	1.75924	1.79804	0.173696	1.48863	1030.57	11.6408	1032.44	14.2017	1026.57	20.4173	1026.57	20.4173
Jm	18130.9	167.154	1.2491	1.82112	1.60486	0.179718	1.31714	1053.09	10.5196	1065.43	12.935	1027.56	18.562	1027.56	18.562
Jm	18554.2	157.947	2.81675	1.79537	1.65186	0.177143	1.32325	1043.78	10.7729	1051.35	12.8368	1027.94	20.0149	1027.94	20.0149
Jm	31352	314.238	5.22359	1.57256	1.61186	0.154893	1.39359	959.436	10.0049	928.331	12.0488	1031.42	16.3891	1031.42	16.3891
Jm	10244.5	52.2169	1.37523	1.84177	1.89828	0.181384	1.38727	1060.49	12.4928	1074.53	13.7306	1031.7	26.208	1031.7	26.208
Jm	75427.3	115.826	2.87923	1.77327	1.81663	0.174322	1.38451	1035.72	11.795	1035.88	13.249	1035.35	23.778	1035.35	23.778
Jm	42735.5	339.747	3.13766	1.77327	1.81422	0.174253	1.54229	1035.72	11.7794	1035.5	14.7538	1036.16	19.316	1036.16	19.316
Jm	132104	1118.36	8.47677	1.55324	1.59697	0.152395	1.36728	951.782	9.86479	914.376	11.6559	1039.28	16.6769	1039.28	16.6769
Jm	207401	203.229	4.2027	1.74493	1.6009	0.170749	1.27135	1025.29	10.3337	1016.24	11.953	1044.67	19.644	1044.67	19.644
Jm	15209.8	152.162	2.07266	1.86333	1.76384	0.182265	1.27891	1068.17	11.6554	1079.34	12.7101	1045.45	24.5189	1045.45	24.5189
Jm	34144.6	185.861	4.26779	1.79841	1.65884	0.175843	1.29053	1044.88	10.825	1044.23	12.4413	1046.27	21.0368	1046.27	21.0368
Jm	33454.4	116.971	1.94607	1.85037	1.71924	0.180077	1.49611	1063.56	11.3329	1067.4	14.7174	1055.72	17.076	1055.72	17.076
Jm	1.09122e+06	128.844	1.73427	1.70611	2.00402	0.16594	1.60403	1010.82	12.8297	989.702	14.7165	1056.91	24.1885	1056.91	24.1885
Jm	44776.3	94.4083	1.89998	1.87539	1.5223	0.182221	1.08552	1072.43	10.0818	1079.1	10.7859	1058.93	21.5011	1058.93	21.5011
Jm	32798.9	274.572	2.74094	1.74532	1.59619	0.169441	1.23305	1025.43	10.3041	1009.03	11.517	1060.62	20.3979	1060.62	20.3979
Jm	15343.3	58.7046	1.60933	1.8982	1.82486	0.184227	1.35845	1080.46	12.1365	1090.03	13.6233	1061.23	24.5242	1061.23	24.5242
Jm	51957.3	129.085	2.05153	1.85547	1.63392	0.179744	1.36863	1065.38	10.7809	1065.58	13.4422	1064.98	17.9287	1064.98	17.9287
Jm	26956.2	55.363	4.33889	1.88709	1.54399	0.182264	1.20667	1076.56	10.2476	1079.33	11.9921	1070.97	19.3353	1070.97	19.3353
Jm	42070.1	476.246	2.17567	1.90388	1.67713	0.183818	1.39219	1082.45	11.1654	1087.8	13.9355	1071.7	18.769	1071.7	18.769
Jm	36447.3	142.475	1.67407	1.82432	1.59793	0.175632	1.27475	1054.24	10.4807	1043.07	12.2765	1077.42	19.3293	1077.42	19.3293
Jm	44990.7	121.81	3.27586	1.89421	1.78162	0.18183	1.36585	1079.06	11.8403	1076.97	13.5467	1083.28	22.9238	1083.28	22.9238
Jm	3.87162e+06	57.3934	2.46854	1.88465	1.79973	0.180731	1.36032	1075.7	11.9397	1070.97	13.4227	1085.29	23.6064	1085.29	23.6064
Jm	30710.8	112.212	2.40285	1.8936	1.67281	0.180614	1.23234	1078.84	11.1158	1070.33	12.1532	1096.11	22.6441	1096.11	22.6441
Jm	42133	34.685	3.98564	1.95008	1.7059	0.185204	1.38319	1098.47	11.4504	1095.34	13.9334	1104.68	19.9547	1104.68	19.9547
Jm	31198.3	91.9918	4.02295	2.00298	1.88217	0.190128	1.57176	1116.52	12.7479	1122.07	16.1867	1105.72	20.7049	1105.72	20.7049
Jm	28128.4	180.933	3.14856	2.02932	1.43322	0.192255	1.04305	1125.39	9.74904	1133.58	10.8425	1109.59	19.6522	1109.59	19.6522
Jm	67121.4	49.987	3.95971	1.96544	1.95414	0.186202	1.61714	1103.75	13.1516	1100.77	16.3642	1109.6	21.9144	1109.6	21.9144
Jm	9674.49	76.8058	3.78545	2.07312	1.89958	0.195853	1.57802	1139.96	13.0124	1153	16.6604	1115.25	21.117	1115.25	21.117
Jm	15609.5	118.204	8.9496	2.06367	1.5728	0.194604	1.1631	1136.84	10.7577	1146.27	12.2142	1118.9	21.1179	1118.9	21.1179
Jm	20747.4	172.328	3.17557	2.06784	1.89654	0.194666	1.51223	1138.22	12.9808	1146.6	15.8848	1122.26	22.8138	1122.26	22.8138
Jm	111893	661.93	2.14671	2.09318	1.57146	0.196318	1.33149	1146.57	10.7982	1155.51	14.0854	1129.69	16.6431	1129.69	16.6431
Jm	17104.6	117.286	2.28628	2.01596	1.60116	0.188906	1.14234	1120.9	10.8677	1115.44	11.7007	1131.47	22.3404	1131.47	22.3404
Jm	15955	181.526	1.62611	1.91354	1.56967	0.178982	1.2903	1085.82	10.4682	1061.41	12.6273	1135.14	17.7719	1135.14	17.7719
Jm	32161.5	221.24	3.71408	2.01435	1.62505	0.188077	1.43216	1120.36	11.0269	1110.95	14.6151	1138.64	15.2714	1138.64	15.2714
Jm	286252	1164.39	3.8686	1.82464	1.48623	0.169463	1.19962	1054.35	9.74863	1009.15	11.206	1149.18	17.4249	1149.18	17.4249
Jm	34305.2	1020.23	3.03585	1.865	1.79026	0.173081	1.48405	1068.76	11.8337	1029.06	14.1152	1150.67	19.8949	1150.67	19.8949
Jm	7838.3	88.863	3.08323	2.19514	1.49755	0.203578	1.15433	1179.5	10.4471	1194.51	12.5865	1152.04	18.9578	1152.04	18.9578
Jm	46656.9	410.323	4.41392	2.03744	1.57179	0.188104	1.31101	1128.11	10.7058	1111.1	13.3804	1160.98	17.2088	1160.98	17.2088
Jm	30014.9	218.721	2.70165	2.14945	1.60995	0.198007	1.33668	1164.88	11.1572	1164.6	14.2418	1165.37	17.7909	1165.37	17.7909
Jm	23796.8	102.242	10.3201	1.84466	2.05766	0.169481	1.63453	1061.52	13.5492	1009.25	15.27	1170.63	24.7551	1170.63	24.7551
Jm	1.13104e+06	73.4389	2.64601	2.13008	1.71226	0.195558	1.42352	1158.61	11.832	1151.41	15.0102	1172.12	18.8538	1172.12	18.8538
Jm	30599.5	268.684	4.00063	2.21405	1.40901	0.203205	1.17125	1185.49	9.85579	1192.51	12.7515	1172.72	15.5151	1172.72	15.5151
Jm	86987.6	203.683	4.75737	2.06361	1.77764	0.188498	1.51161	1136.82	12.1587	1113.23	15.4549	1182.14	18.4893	1182.14	18.4893
Jm	30499	123.483	3.73308	2.22307	1.34583	0.202734	0.966999	1188.34	9.42574	1189.99	10.5075	1185.35	18.5109	1185.35	18.5109
Jm	7361	205.468	2.87722	1.91145	1.839	0.172809	1.31821	1085.09	12.2599	1027.57	12.5211	1202.44	25.2702	1202.44	25.2702
Jm	33585.9	508.883	3.29128	2.2845	1.53529	0.203542	1.32714	1207.51	10.8433	1194.32	14.4687	1231.19	15.1484	1231.19	15.1484
Jm	42201.4	410.369	2.61388	2.30675	1.54792	0.202807	1.25243	1214.36	10.9647	1190.38	13.6132	1257.25	17.7769	1257.25	17.7769
Jm	37936.3	193.197	2.3	2.44276	1.78637	0.214537	1.53197	1255.29	12.8706	1252.95	17.4446	1259.3	17.9528	1259.3	17.9528
Jm	16812.8	79.9444	1.8039	2.65199	2.01736	0.227341	1.74318	1315.2	14.876	1320.55	20.8148	1306.47	19.7159	1306.47	19.7159
Jm	30131.6	103.551	2.53014	2.61677	1.53047	0.22268	1.18799	1305.36	11.2439	1296.02	13.9476	1320.72	18.6974	1320.72	18.6974
Jm	16942.4	109.477	1.40086	2.64987	1.64898	0.224488	1.28488	1314.61	12.1566	1305.55	15.1851	1329.4	20.0032	1329.4	20.0032
Jm	11110.9	38.7262	3.69853	2.76424	1.96645	0.230056	1.52987	1345.94	14.6636	1334.79	18.4451	1363.68	23.7971	1363.68	23.7971
Jm	91626.7	61.8764	3.92352	2.84483	1.52912	0.234313	1.02179	1367.45	11.4886	1357.07	12.5041	1383.69	21.8508	1383.69	21.8508
Jm	13409.6	47.6534	1.51677	2.72226	1.54771	0.224013	1.04369	1334.55	11.4937	1303.05	12.3134	1385.44	21.9464	1385.44	21.9464
Jm	384043	59.8555	2.05361	3.00972	1.6317	0.245736	1.18705	1410.08	12.4366	1416.45	15.095	1400.46	21.4544	1400.46	21.4544
Jm	39808.9	104.578	3.35298	2.94004	1.56221	0.239788	1.26082	1392.28	11.837	1385.59	15.72	1402.53	17.6717	1402.53	17.6717
Jm	17235.5	101.212	2.11743	3.03167	1.59534	0.24712	1.36826	1415.63	12.1815	1423.61	17.4778	1403.62	15.7143	1403.62	15.7143
Jm	1.62793e+06	535.425	4.00489	3.0999	1.90117	0.251638	1.66959	1432.67	14.5967	1446.92	21.6385	1411.54	17.4001	1411.54	17.4001
Jm	2.76158e+06	348.717	1.99603	3.0653	1.44447	0.247574	1.2576	1424.06	11.0595	1425.95	16.088	1421.22	13.579	1421.22	13.579
Jm	485697	215.87	1.29844	3.09592	1.56338	0.25004	1.28863	1431.68	11.9992	1438.68	16.6162	1421.27	16.9157	1421.27	16.9157
Jm	70249.6	346.983	1.88672	3.09621	1.57032	0.248943	1.31416	1431.75	12.0528	1433.02	16.886	1429.84	16.4072	1429.84	16.4072
Jm	174290	836.667	3.70976	2.8667	1.90339	0.229915	1.65223	1373.21	14.3294	1334.05	19.9105	1434.62	18.0259	1434.62	18.0259
Jm	18265.4	193.088	2.1692	3.05503	1.71455	0.244964	1.42538	1421.49	13.1167	1412.45	18.0799	1435.04	18.1749	1435.04	18.1749
Jm	84335.4	181.241	2.17323	3.11588	1.84362	0.24976	1.44907	1436.62	14.1725	1437.24	18.6684	1435.68	21.7384	1435.68	21.7384
Jm	100634	132.655	1.01472	3.11763	1.85699	0.249794	1.53668	1437.05	14.2772	1437.42	19.7992	1436.49	19.8825	1436.49	19.8825
Jm	10870.7	74.901	2.50821	3.24243	1.64548	0.259625	1.09941	1467.37	12.7703	1487.92	14.6078	1437.73	23.3439	1437.73	23.3439
Jm	9725.82	14.3263	0.937138	2.94473	2.48311	0.235733	1.85357	1393.49	18.8237	1364.48	22.7943	1438.17	31.5039	1438.17	31.5039
Jm	20298.9	109.078	1.2011	3.06507	1.47572	0.245322	1.26586	1424	11.2985	1414.31	16.0754	1438.51	14.4607	1438.51	14.4607
Jm	48417.2	84.5507	1.64598	3.14153	1.57382	0.251258	1.16971	1442.93	12.1223	1444.96	15.1415	1439.91	20.0707	1439.91	20.0707
Jm	34702.5	197.2	1.18022	3.15519	1.45337	0.252299	1.17595	1446.27	11.2062	1450.32	15.2728	1440.3	16.2785	1440.3	16.2785
Jm	140496	213.225	5.90809	2.93575	1.82115	0.234699	1.55244	1391.18	13.7941	1359.08	19.0233	1440.73	18.1464	1440.73	18.1464
Jm	369056	141.787	1.71493	3.09977	1.45728	0.247722	1.21161	1432.63	11.1882	1426.72	15.507	1441.41	15.4312	1441.41	15.4312
Jm	38504.9	117.455	3.96762	3.18653	1.67717	0.254423	1.25764	1453.9	12.9627	1461.24	16.4432	1443.16	21.1418	1443.16	21.1418
Jm	16825.9	50.8629	1.23426	3.18167	1.64647	0.253563	1.32012	1452.72	12.7207	1456.83	17.2137	1446.7	18.7381	1446.7	18.7381
Jm	255409	405.145	6.73256	3.12685	1.93212	0.248389	1.73599	1439.32	14.8656	1430.16	22.2663	1452.86	16.1395	1452.86	16.1395
Jm	37764.1	112.645	1.27991	3.28029	1.76709	0.258526	1.389	1476.39	13.7516	1482.3	18.3935	1467.89	20.7438	1467.89	20.7438
Jm	5422.22	37.3504	2.70632	3.24303	1.93728	0.255289	1.62441	1467.51	15.0359	1465.69	21.2963	1470.12	20.04	1470.12	20.04
Jm	76617.8	92.9593	2.02436	3.08055	1.81795	0.242218	1.44842	1427.86	13.9363	1398.22	18.2064	1472.32	20.8505	1472.32	20.8505
Jm	35141.8	153.983	2.98754	3.50078	1.5293	0.270781	1.24238	1527.39	12.0787	1544.77	17.0657	1503.39	16.854	1503.39	16.854
Jm	36893.3	350.308	2.24338	3.48674	1.64927	0.266926	1.46054	1524.22	13.0147	1525.18	19.8368	1522.87	14.4401	1522.87	14.4401
Jm	1790.46	8.01192	1.59907	3.64236	2.93929	0.27729	1.40942	1558.84	23.4203	1577.7	19.7245	1533.36	48.5587	1533.36	48.5587
Jm	16319.9	67.5376	1.9168	3.63432	1.37672	0.272903	0.996346	1557.08	10.963	1555.52	13.7703	1559.18	17.8226	1559.18	17.8226
Jm	11201.2	41.8272	1.75383	3.82482	1.79745	0.278304	1.52888	1597.98	14.4692	1582.82	21.4575	1618.03	17.595	1618.03	17.595
Jm	238825	450.397	13.3363	3.96536	1.51637	0.287946	1.30581	1627.14	12.2967	1631.26	18.8197	1621.79	14.3431	1621.79	14.3431
Jm	144030	268.066	3.40633	4.10552	1.7943	0.296605	1.60625	1655.4	14.6515	1674.45	23.6866	1631.29	14.8609	1631.29	14.8609
Jm	38503.8	152.462	2.50048	3.99568	1.73772	0.287855	1.48413	1633.32	14.1134	1630.8	21.3845	1636.54	16.7864	1636.54	16.7864
Jm	46432.5	117.831	1.38115	4.16711	1.76821	0.299204	1.49979	1667.58	14.4804	1687.36	22.2659	1642.74	17.3818	1642.74	17.3818
Jm	71821	167.619	1.95783	4.04397	1.69138	0.288586	1.41712	1643.09	13.77	1634.46	20.4591	1654.13	17.1088	1654.13	17.1088
Jm	391258	83.5946	0.853664	4.09391	1.4333	0.291765	1.05399	1653.09	11.697	1650.34	15.3463	1656.57	17.9926	1656.57	17.9926
Jm	149282	361.133	2.72007	3.62838	2.4069	0.257983	2.22179	1555.78	19.1612	1479.51	29.3725	1660.9	17.1366	1660.9	17.1366
Jm	6.02666e+06	264.649	3.6823	4.04963	1.56688	0.286519	1.34297	1644.22	12.7598	1624.11	19.2808	1670.01	14.9258	1670.01	14.9258
Jm	33059.6	249.948	3.13298	4.25747	1.51144	0.298937	1.29918	1685.18	12.4285	1686.03	19.2743	1684.1	14.2588	1684.1	14.2588
Jm	52145.4	337.86	3.96812	4.20718	1.71463	0.294257	1.37759	1675.42	14.0675	1662.77	20.1904	1691.29	18.8275	1691.29	18.8275
Jm	34270.4	129.672	3.3807	4.21377	1.67544	0.294582	1.42545	1676.7	13.75	1664.39	20.9097	1692.14	16.2353	1692.14	16.2353
Jm	505968	196.863	1.73046	4.4023	1.35113	0.305982	1.16079	1712.77	11.1801	1720.9	17.532	1702.83	12.7325	1702.83	12.7325
Jm	50872.8	107.739	3.20426	4.36773	1.42332	0.302751	1.16549	1706.26	11.7602	1704.93	17.4603	1707.86	15.035	1707.86	15.035
Jm	57742.9	103.683	2.12519	4.37905	1.68587	0.3034	1.40886	1708.39	13.9366	1708.15	21.141	1708.68	17.0378	1708.68	17.0378
Jm	7899.35	12.7029	5.01277	4.45113	2.14362	0.307386	1.55574	1721.91	17.7748	1727.83	23.5797	1714.7	27.1181	1714.7	27.1181
Jm	129387	257.733	4.19709	4.51105	1.70275	0.310733	1.37903	1733.01	14.1532	1744.31	21.0749	1719.37	18.3554	1719.37	18.3554
Jm	30960.1	187.47	1.99413	4.24938	1.55918	0.292671	1.31296	1683.62	12.8165	1654.86	19.1629	1719.61	15.4549	1719.61	15.4549
Jm	101138	209.631	3.45165	4.59651	1.19648	0.312187	0.914107	1748.63	9.97841	1751.46	14.0196	1745.24	14.1405	1745.24	14.1405
Jm	168193	386.687	4.30856	4.09063	2.08566	0.277778	1.89405	1652.44	17.019	1580.16	26.5433	1745.58	15.9946	1745.58	15.9946
Jm	27041.1	260.587	2.40559	4.50635	1.50927	0.304963	1.24676	1732.14	12.5424	1715.87	18.7824	1751.84	15.5674	1751.84	15.5674
Jm	35715.5	258.345	3.74762	4.85411	1.5907	0.322597	1.38257	1794.33	13.3934	1802.4	21.739	1784.94	14.338	1784.94	14.338
Jm	72743.9	191.546	0.642911	4.83435	1.79776	0.320263	1.47979	1790.89	15.1265	1791.01	23.1402	1790.74	18.5944	1790.74	18.5944
Jm	160591	51.2378	2.23205	4.85008	1.63635	0.320633	1.3469	1793.63	13.7759	1792.82	21.0805	1794.55	16.9177	1794.55	16.9177
Jm	57413.8	129.935	0.994048	5.39058	1.85902	0.338877	1.49456	1883.36	15.9237	1881.26	24.3856	1885.65	19.9063	1885.65	19.9063
Jm	19559.8	61.7201	2.31681	5.83887	1.56673	0.350099	1.11802	1952.2	13.583	1935.07	18.6894	1970.4	19.5654	1970.4	19.5654
Jm	37535.5	97.0617	1.69509	6.08167	1.21288	0.363651	1.00388	1987.62	10.5767	1999.46	17.2576	1975.32	12.1255	1975.32	12.1255
Jm	49767	214.338	4.42371	5.60572	1.58742	0.332494	1.3081	1916.98	13.6791	1850.46	21.0415	1989.71	15.9946	1989.71	15.9946
Jm	62494.8	360.092	7.10697	5.98889	1.57311	0.349253	1.35663	1974.23	13.6884	1931.03	22.6375	2019.79	14.1164	2019.79	14.1164
Jm	12907.1	145.4	3.27807	6.27582	1.7633	0.362999	1.4254	2015.09	15.4447	1996.38	24.4718	2034.3	18.3669	2034.3	18.3669
Jm	39896.9	109.981	3.20022	6.5267	1.41076	0.375002	1.12932	2049.51	12.4221	2052.89	19.8549	2046.08	14.9399	2046.08	14.9399
Jm	173187	123.515	2.10756	7.10044	1.58679	0.384397	1.39378	2124.1	14.1239	2096.79	24.948	2150.62	13.2446	2150.62	13.2446
Jm	30604.2	41.5534	2.0804	9.5603	1.87566	0.443826	1.61321	2393.36	17.2433	2367.74	31.9677	2415.22	16.2455	2415.22	16.2455
Jm	31344.1	19.7598	1.38037	12.1618	1.37652	0.505095	1.20982	2616.97	12.9157	2635.66	26.1728	2602.52	10.9408	2602.52	10.9408
Jm	64668.6	51.3674	0.905141	13.3968	1.59321	0.51885	1.30772	2708.03	15.0547	2694.3	28.798	2718.28	15.0026	2718.28	15.0026
Jm	1.09831e+06	251.216	12.7532	12.3833	1.80008	0.460515	1.53555	2633.91	16.9136	2441.83	31.212	2785	15.3877	2785	15.3877
Jm	82425.2	53.9708	1.70029	14.9687	1.84415	0.550114	1.60599	2813.25	17.5543	2825.65	36.7413	2804.37	14.8263	2804.37	14.8263
Jm	18500.4	40.0334	1.73078	15.2453	1.74454	0.554456	1.36522	2830.69	16.6248	2843.68	31.3916	2821.45	17.7328	2821.45	17.7328
Jm	20654.6	40.9778	2.75157	14.9602	1.84374	0.539166	1.48827	2812.71	17.5498	2779.96	33.6078	2836.26	17.746	2836.26	17.746
Je	6880.45	297.364	1.52239	0.160289	2.09815	0.0238684	1.13199	150.956	2.9431	152.058	1.70114	133.68	41.5178	152.058	1.70114
Je	19021.7	165.609	1.68413	0.167645	1.9723	0.0239023	1.22811	157.373	2.8753	152.271	1.84814	234.901	35.6116	152.271	1.84814
Je	45586.1	735.196	2.04678	0.164891	1.62847	0.0239447	1.30457	154.976	2.34057	152.538	1.96661	192.435	22.6812	152.538	1.96661
Je	30335	314.609	1.50706	0.171321	1.64091	0.0242	1.20478	160.564	2.43696	154.145	1.83509	256.328	25.6302	154.145	1.83509
Je	25955.8	1139.2	1.96019	0.164526	1.79116	0.0242314	1.37256	154.658	2.56952	154.343	2.0933	159.48	26.9252	154.343	2.0933
Je	2568.16	246.191	0.939371	0.15126	2.45689	0.0243713	1.16471	143.023	3.27768	155.224	1.78631	NA	NA	155.224	1.78631
Je	23548.7	833.093	1.6744	0.167636	1.9708	0.0244243	1.66171	157.366	2.87299	155.557	2.55397	184.655	24.6826	155.557	2.55397
Je	32258	1154.69	1.43413	0.167209	1.92067	0.0245288	1.54654	156.994	2.79379	156.215	2.38689	168.747	26.6209	156.215	2.38689
Je	18573.1	641.519	1.85993	0.166619	1.92405	0.024549	1.42391	156.48	2.79024	156.342	2.19938	158.555	30.2578	156.342	2.19938
Je	25987.5	406.897	1.43947	0.165731	1.4635	0.0247003	1.01276	155.708	2.11266	157.294	1.57373	131.66	24.8218	157.294	1.57373
Je	4.01783e+06	312.493	3.22031	0.17636	1.9093	0.0249518	1.41188	164.924	2.90647	158.876	2.21571	252.66	29.5791	158.876	2.21571
Je	12530.7	726.238	1.27917	0.170694	1.78552	0.0251225	1.22621	160.021	2.64345	159.949	1.93719	161.095	30.3573	159.949	1.93719
Je	11842.3	348.076	1.47005	0.17224	1.89791	0.025153	1.228	161.361	2.83154	160.141	1.94231	179.276	33.7342	160.141	1.94231
Je	4424.86	188.011	2.44692	0.163258	3.29977	0.0253293	1.25313	153.551	4.70235	161.25	1.9956	36.2761	73.0898	161.25	1.9956
Je	15353.4	347.887	2.95795	0.170699	1.70448	0.025393	1.16598	160.025	2.52353	161.65	1.86137	136.026	29.1915	161.65	1.86137
Je	10051.5	921.688	20.4359	0.166007	1.91511	0.0254202	1.61307	155.948	2.76853	161.821	2.5778	67.63	24.5597	161.821	2.5778
Je	32555.1	1410.83	1.44403	0.192113	2.33086	0.0255415	1.45855	178.431	3.81406	162.584	2.34171	393.874	40.784	162.584	2.34171
Je	24475.8	163.655	1.90813	0.176563	1.97938	0.0256669	1.38648	165.099	3.01611	163.371	2.23665	189.967	32.8732	163.371	2.23665
Je	3663.17	344.306	2.5755	0.173235	4.63792	0.0256687	1.30456	162.223	6.95362	163.383	2.10465	145.296	104.456	163.383	2.10465
Je	21708.9	1797.58	8.81646	0.173897	1.71632	0.0256938	1.52682	162.796	2.58162	163.541	2.46557	151.966	18.3481	163.541	2.46557
Je	3788.99	220.949	1.81725	0.167158	2.03928	0.0257098	1.44776	156.949	2.96555	163.641	2.33931	57.056	34.2716	163.641	2.33931
Je	15575.8	753.399	1.15177	0.175188	1.83754	0.0257184	1.33926	163.911	2.78141	163.696	2.16471	167.008	29.3882	163.696	2.16471
Je	6198.19	283.586	2.01786	0.175102	2.17192	0.0257324	1.59817	163.837	3.28618	163.784	2.58456	164.59	34.3898	163.784	2.58456
Je	54932	472.64	3.02842	0.176622	1.50141	0.0257386	1.02527	165.15	2.28844	163.822	1.65846	184.204	25.5451	163.822	1.65846
Je	334514	2111.89	1.57534	0.177875	1.71897	0.0257655	1.31312	166.23	2.63582	163.992	2.12625	198.248	25.7711	163.992	2.12625
Je	12838.3	721.217	1.23062	0.178609	1.99101	0.0258185	1.60746	166.863	3.06365	164.324	2.60807	203.03	27.268	164.324	2.60807
Je	95980	1386.37	2.18757	0.179349	1.76089	0.0258615	1.53681	167.5	2.71906	164.595	2.49749	208.752	19.9315	164.595	2.49749
Je	33552.7	844.171	1.46463	0.178988	1.65301	0.0258792	1.44081	167.19	2.54813	164.706	2.34304	202.475	18.8077	164.706	2.34304
Je	9686.86	966.316	16.2212	0.173817	1.64213	0.0259398	1.26409	162.726	2.46905	165.087	2.06035	128.537	24.6531	165.087	2.06035
Je	27328.8	403.95	4.65006	0.176169	1.74115	0.0259875	1.29432	164.759	2.64806	165.386	2.11341	155.743	27.2438	165.386	2.11341
Je	24221.3	277.717	1.75888	0.182434	2.16153	0.0260664	1.54658	170.152	3.38627	165.882	2.53277	229.925	34.8668	165.882	2.53277
Je	37608.4	884.113	3.81021	0.182054	1.61719	0.0260683	1.21763	169.826	2.52903	165.894	1.9942	224.971	24.5874	165.894	1.9942
Je	13557.6	367.117	1.07194	0.179044	1.66004	0.0260854	0.981545	167.238	2.55965	166.002	1.60858	184.742	31.1703	166.002	1.60858
Je	25007	732.457	1.15968	0.18171	1.85327	0.026216	1.53552	169.531	2.8936	166.822	2.52873	207.513	24.0657	166.822	2.52873
Je	25499	505.469	1.34633	0.189306	1.55675	0.0263237	1.18778	176.037	2.51606	167.499	1.9639	292.293	22.9829	167.499	1.9639
Je	40896.6	699.195	1.74332	0.18209	1.68821	0.0263526	1.3466	169.857	2.64053	167.68	2.22887	200.314	23.658	167.68	2.22887
Je	10248.8	835.378	3.25591	0.179657	1.7136	0.0263757	1.20914	167.765	2.64988	167.825	2.00305	166.895	28.3805	167.825	2.00305
Je	125747	714.069	1.27972	0.180602	1.45384	0.0264068	1.20495	168.579	2.25822	168.02	1.9984	176.405	18.9732	168.02	1.9984
Je	18884.8	1062.31	0.831241	0.177878	1.82857	0.026418	1.49058	166.233	2.80392	168.09	2.47314	139.89	24.8483	168.09	2.47314
Je	6862.62	777.399	3.39514	0.172557	1.94509	0.0264546	1.65293	161.635	2.90649	168.321	2.74622	64.7773	24.4137	168.321	2.74622
Je	10532.5	717.735	3.83578	0.175877	1.9301	0.0264636	1.646	164.506	2.93129	168.377	2.73562	109.164	23.8	168.377	2.73562
Je	11713.9	928.11	3.00664	0.176985	1.8198	0.0264858	1.44282	165.463	2.77856	168.516	2.39988	122.017	26.1186	168.516	2.39988
Je	36142.1	1381.12	1.3248	0.18034	1.6017	0.0265671	1.3779	168.353	2.48483	169.027	2.29875	158.914	19.1017	169.027	2.29875
Je	17873	462.305	1.81588	0.178799	1.59101	0.0265897	1.03727	167.027	2.45036	169.169	1.73192	136.8	28.3269	169.169	1.73192
Je	44339.9	613.252	6.41503	0.184935	1.8108	0.0265994	1.56254	172.298	2.86964	169.23	2.60988	214.612	21.1892	169.23	2.60988
Je	40336.2	735.642	1.51425	0.186269	1.62188	0.0266855	1.36754	173.441	2.58587	169.771	2.29138	223.799	20.162	169.771	2.29138
Je	125819	479.99	1.08073	0.187586	1.76498	0.0267124	1.34417	174.567	2.83077	169.939	2.25443	237.719	26.3834	169.939	2.25443
Je	26592.7	550.29	4.1114	0.184794	1.79095	0.0268144	1.25191	172.177	2.83635	170.58	2.1075	194.201	29.7775	170.58	2.1075
Je	5944.73	330.291	1.23564	0.177706	3.04716	0.0268365	1.00541	166.085	4.66869	170.719	1.69389	100.521	68.0403	170.719	1.69389
Je	17561	621.215	3.14927	0.185486	1.68063	0.0270596	1.08901	172.77	2.67004	172.119	1.8496	181.676	29.8195	172.119	1.8496
Je	240461	717.275	1.93541	0.187304	1.65752	0.02716	1.26228	174.326	2.65507	172.749	2.15162	195.799	24.9667	172.749	2.15162
Je	30646.1	1042.23	4.74923	0.1901	1.80871	0.0271945	1.49978	176.715	2.93358	172.966	2.55962	227.184	23.362	172.966	2.55962
Je	17863.5	696.26	40.0452	0.185879	1.61194	0.0272665	1.28677	173.107	2.56548	173.417	2.20173	168.84	22.6754	173.417	2.20173
Je	7256.53	520.486	1.80522	0.186664	1.93808	0.0272666	1.29074	173.779	3.09553	173.418	2.20854	178.67	33.7058	173.418	2.20854
Je	3836.28	155.113	2.00693	0.17399	2.49204	0.0273295	1.44198	162.876	3.75014	173.813	2.47286	6.68775	48.913	173.813	2.47286
Je	4359.82	282.481	1.20832	0.182565	1.89719	0.0277686	1.24543	170.266	2.97396	176.567	2.16919	83.5452	33.9521	176.567	2.16919
Je	13158	585.865	2.69948	0.194787	1.94797	0.0281846	1.42014	180.705	3.22465	179.177	2.50952	200.721	30.9604	179.177	2.50952
Je	3984.99	499.501	5.83803	0.18509	2.37752	0.0285936	1.12841	172.431	3.7704	181.74	2.02213	46.5547	49.9824	181.74	2.02213
Je	34406.8	312.277	2.07187	0.209402	1.88366	0.0306039	1.35486	193.051	3.31164	194.327	2.59356	177.458	30.5386	194.327	2.59356
Je	9007.51	231.151	1.05478	0.237156	2.3424	0.0315637	1.62672	216.089	4.55936	200.327	3.20866	391.486	37.8112	200.327	3.20866
Je	3559.69	171.048	2.62322	0.20531	1.93782	0.031804	1.18014	189.609	3.35163	201.829	2.34496	40.0546	36.7614	201.829	2.34496
Je	50204.8	637.972	2.85978	0.231584	1.75196	0.0330909	1.45843	211.505	3.34503	209.864	3.01145	229.798	22.4438	209.864	3.01145
Je	6420.65	214.595	1.40452	0.245972	1.92415	0.0350995	1.13453	223.299	3.857	222.385	2.48	232.96	35.8703	222.385	2.48
Je	8937.56	549.925	1.88491	0.245208	2.3245	0.0354537	1.62644	222.676	4.64787	224.591	3.58994	202.471	38.5674	224.591	3.58994
Je	4241.06	124.454	0.634878	0.243307	2.39421	0.035686	1.36778	221.125	4.75742	226.037	3.03811	169.146	45.9039	226.037	3.03811
Je	3808.98	184.074	0.434901	0.241277	2.20318	0.0357164	1.11967	219.466	4.34841	226.226	2.48905	147.568	44.4934	226.226	2.48905
Je	5101.38	231.667	1.19311	0.246069	1.71735	0.0357687	1.02226	223.378	3.44355	226.552	2.27572	190.104	32.0918	226.552	2.27572
Je	3575.36	191.892	2.28047	0.238818	2.14908	0.0359745	1.23597	217.452	4.20674	227.833	2.76677	106.531	41.5368	227.833	2.76677
Je	18659.3	352.197	1.00017	0.254992	1.62677	0.0360852	1.27361	230.623	3.35617	228.522	2.85949	252.125	23.2822	228.522	2.85949
Je	30153.6	880.283	3.97716	0.254099	1.68905	0.0361632	1.43655	229.901	3.47492	229.007	3.23206	239.074	20.4737	229.007	3.23206
Je	15863.9	309.833	1.19988	0.260405	1.55631	0.036175	1.13049	234.993	3.26488	229.08	2.54426	294.523	24.4412	229.08	2.54426
Je	16211.5	551.971	2.76786	0.257449	2.10571	0.036273	1.80269	232.609	4.37755	229.69	4.0677	262.203	24.9879	229.69	4.0677
Je	9921.45	638.207	0.465766	0.253437	1.90857	0.0362908	1.6257	229.364	3.91839	229.8	3.67007	224.879	23.0927	229.8	3.67007
Je	35638.4	506.658	0.832484	0.255838	1.73147	0.0363583	1.42832	231.307	3.5816	230.221	3.23025	242.34	22.552	230.221	3.23025
Je	7844.64	195.492	0.678364	0.253766	1.99978	0.0363856	1.13237	229.63	4.10989	230.39	2.56281	221.878	38.1496	230.39	2.56281
Je	8266.59	382.747	1.48497	0.252163	1.74729	0.0364702	1.3072	228.331	3.57287	230.916	2.96511	201.768	26.9172	230.916	2.96511
Je	21682.8	496.705	0.638985	0.258693	1.92276	0.0365251	1.57581	233.613	4.01256	231.258	3.5796	257.361	25.3421	231.258	3.5796
Je	17980.6	592.836	2.73389	0.257872	1.6646	0.036529	1.26206	232.951	3.46505	231.282	2.86718	249.796	24.9567	231.282	2.86718
Je	2834.35	211.808	1.67136	0.236865	2.02876	0.0367259	1.43369	215.85	3.94495	232.506	3.27403	37.8101	34.345	232.506	3.27403
Je	7914.44	833.581	2.78758	0.250768	1.62518	0.0368322	1.25716	227.2	3.30849	233.168	2.87892	165.851	24.0771	233.168	2.87892
Je	3941.76	179.595	3.53926	0.251328	2.51561	0.0368658	1.15744	227.655	5.13035	233.377	2.65287	168.929	52.1906	233.377	2.65287
Je	31010.8	541.291	1.74628	0.256328	1.92789	0.0368791	1.54892	231.704	3.994	233.459	3.5514	213.956	26.612	233.459	3.5514
Je	37078.5	334.437	1.78575	0.261612	1.8621	0.0369363	1.239	235.965	3.92074	233.815	2.84506	257.443	31.9411	233.815	2.84506
Je	51836.7	234.706	2.74636	0.260371	1.63587	0.0369745	1.09315	234.966	3.43143	234.052	2.51264	244.094	28.0272	234.052	2.51264
Je	20512	748.812	2.79121	0.264598	1.86961	0.0372238	1.47892	238.366	3.97208	235.602	3.42144	265.709	26.2528	235.602	3.42144
Je	30005	187.98	1.60942	0.268135	1.86562	0.0374572	1.44102	241.202	4.00538	237.052	3.35392	281.816	27.1183	237.052	3.35392
Je	8113.7	691.754	3.18282	0.253317	1.62187	0.037653	1.29437	229.267	3.32852	238.269	3.02777	137.928	22.9366	238.269	3.02777
Je	20416.9	308.003	1.26358	0.269231	1.88356	0.0377821	1.39438	242.079	4.05693	239.071	3.2725	271.338	29.0511	239.071	3.2725
Je	7486.02	348.906	1.12846	0.259168	1.88236	0.0378006	1.2949	233.996	3.93399	239.186	3.04047	182.17	31.8314	239.186	3.04047
Je	4676.17	206.83	2.55083	0.255704	2.06512	0.0378109	1.26721	231.199	4.27001	239.249	2.97623	150.108	38.2174	239.249	2.97623
Je	24471.6	192.122	2.05787	0.272704	1.71884	0.0379087	1.08452	244.854	3.73966	239.857	2.55349	293.055	30.4422	239.857	2.55349
Je	12463.3	661.646	1.61564	0.264987	1.98664	0.037949	1.58016	238.677	4.22561	240.107	3.72428	224.638	27.8454	240.107	3.72428
Je	144542	456.881	2.93956	0.273486	1.77231	0.0383757	1.24538	245.477	3.86467	242.757	2.96702	271.55	28.9067	242.757	2.96702
Je	2863.82	118.736	1.63638	0.247679	3.61478	0.0386378	0.927563	224.689	7.28627	244.384	2.22438	23.221	83.866	244.384	2.22438
Je	16226.4	311.95	1.36801	0.277324	1.62817	0.0389085	1.26112	248.532	3.58937	246.064	3.04467	271.885	23.5938	246.064	3.04467
Je	16128.5	579.909	0.982674	0.280128	1.84238	0.0401475	1.3663	250.759	4.09368	253.747	3.3996	222.883	28.5832	253.747	3.3996
Je	7527.16	480.769	1.69034	0.281681	1.19168	0.0404823	0.884766	251.99	2.65929	255.822	2.2191	216.472	18.5054	255.822	2.2191
Je	42958.5	553.085	1.19206	0.288458	1.4305	0.0407152	1.19407	257.345	3.25186	257.264	3.01142	258.066	18.116	257.264	3.01142
Je	35891.3	342.081	2.34647	0.292637	1.79913	0.040952	1.36394	260.633	4.13568	258.731	3.45906	277.794	26.8704	258.731	3.45906
Je	2403.5	109.029	2.44148	0.276028	2.43677	0.041381	1.1569	247.502	5.35231	261.388	2.96351	117.808	50.5459	261.388	2.96351
Je	37913.3	422.412	1.05398	0.302356	1.52669	0.0420322	1.10301	268.239	3.59892	265.417	2.86813	292.919	24.1042	265.417	2.86813
Je	4162.89	378.255	3.38373	0.287635	1.68359	0.0421042	1.07351	256.696	3.81872	265.863	2.796	173.763	30.2824	265.863	2.796
Je	2203.37	96.6036	1.59584	0.28387	3.4462	0.0425141	1.41603	253.723	7.73708	268.398	3.72258	120.176	74.0676	268.398	3.72258
Je	5952.73	176.228	1.11056	0.309312	1.58879	0.0440236	1.19044	273.648	3.81112	277.725	3.23594	238.942	24.247	277.725	3.23594
Je	109320	475.776	0.740957	0.320602	1.41401	0.0445246	1.01786	282.365	3.48559	280.818	2.79697	295.211	22.4045	280.818	2.79697
Je	23153.1	964.231	2.96506	0.325444	1.57696	0.045907	1.38133	286.082	3.9316	289.344	3.90842	259.492	17.4992	289.344	3.90842
Je	17391.6	556.351	0.987619	0.331025	1.5862	0.0460821	1.28614	290.348	4.00557	290.423	3.65234	289.741	21.2167	290.423	3.65234
Je	36994.9	998.502	3.74948	0.329136	1.70535	0.0462115	1.45281	288.906	4.28797	291.22	4.13674	270.21	20.4768	291.22	4.13674
Je	28123.5	368.767	3.3265	0.344424	1.36984	0.046549	0.939031	300.519	3.56334	293.299	2.69246	356.951	22.5032	293.299	2.69246
Je	55590.8	806.63	2.39306	0.361479	1.4951	0.0500938	1.2994	313.318	4.03065	315.097	3.99591	300.127	16.8439	315.097	3.99591
Je	60132.1	242.001	2.44344	0.547425	2.40574	0.0514784	1.56628	443.309	8.6418	323.592	4.94327	1124.42	36.3998	323.592	4.94327
Je	2534.75	59.172	1.11019	0.34761	3.37286	0.0517571	1.41533	302.922	8.83418	325.3	4.48985	133.921	71.9731	325.3	4.48985
Je	70797.1	213.76	1.26428	0.398717	1.81133	0.0534803	1.3769	340.717	5.24282	335.853	4.50597	374.01	26.4906	335.853	4.50597
Je	10349	305.704	2.74704	0.42432	1.67867	0.0566157	1.25693	359.136	5.07793	355.011	4.34161	385.848	24.9933	355.011	4.34161
Je	8486.57	329.107	1.21721	0.414504	1.56942	0.0570316	1.16828	352.114	4.66979	357.548	4.06342	316.413	23.8395	357.548	4.06342
Je	106192	1081.26	1.87748	0.421687	1.58921	0.0571197	1.34784	357.257	4.78631	358.085	4.69481	351.892	19.0148	358.085	4.69481
Je	40257.5	189.178	3.40709	0.457965	1.82167	0.0600689	1.42394	382.842	5.81017	376.044	5.20147	424.127	25.3509	376.044	5.20147
Je	8697.74	275.952	1.53956	0.456597	2.0346	0.0617157	1.18379	381.888	6.47603	386.051	4.4359	356.709	37.3401	386.051	4.4359
Je	150911	592.843	0.716073	0.474273	1.53103	0.0626709	1.30759	394.136	5.00111	391.848	4.97117	407.557	17.8208	391.848	4.97117
Je	11281.5	425.962	4.91237	0.484006	1.4297	0.0639014	1.10278	400.817	4.73471	399.308	4.2699	409.505	20.3533	399.308	4.2699
Je	38526.6	759.576	1.75532	0.51421	1.76267	0.0673167	1.49695	421.276	6.07801	419.969	6.08631	428.415	20.7503	419.969	6.08631
Je	13474.4	206.518	0.624126	0.51659	1.63758	0.0673418	1.19568	422.871	5.66391	420.121	4.86312	437.873	24.9284	420.121	4.86312
Je	23162.5	506.437	1.59773	0.550014	1.75311	0.067613	1.37932	445.006	6.31658	421.759	5.6312	567.071	23.5575	421.759	5.6312
Je	34737.2	264.695	2.21444	0.517177	1.52664	0.0677342	1.08578	423.264	5.28414	422.49	4.44023	427.455	23.9317	422.49	4.44023
Je	30922.2	169.754	1.16288	0.545656	1.91195	0.0692514	1.43101	442.147	6.85362	431.644	5.97461	497.19	27.9365	431.644	5.97461
Je	34012.3	540.17	2.21584	0.541026	1.73382	0.0700507	1.49969	439.101	6.18085	436.461	6.32889	452.944	19.3198	436.461	6.32889
Je	15724.1	168.115	2.28706	0.555281	1.59667	0.0718085	1.03897	448.45	5.78832	447.042	4.48723	455.679	26.9255	447.042	4.48723
Je	217414	640.712	2.28382	0.546581	1.79356	0.0722795	1.58205	442.754	6.43625	449.875	6.87457	405.893	18.9134	449.875	6.87457
Je	8718.11	305.645	2.65095	0.554516	1.81074	0.0724118	1.10726	447.951	6.55858	450.67	4.81966	433.993	31.9136	450.67	4.81966
Je	185986	265.758	1.17959	0.645106	1.64276	0.0806608	1.36818	505.463	6.54104	500.066	6.58318	529.981	19.9303	500.066	6.58318
Je	1.96976e+06	275.179	1.46673	0.699864	1.59439	0.0854577	1.27873	538.71	6.66547	528.617	6.48984	581.645	20.662	528.617	6.48984
Je	32241	118.684	1.25309	0.720384	1.75484	0.0881853	1.10275	550.894	7.46127	544.796	5.7609	576.206	29.6744	544.796	5.7609
Je	6802.1	128.337	1.50618	0.710673	1.99936	0.0892892	1.34621	545.146	8.43399	551.332	7.11356	519.35	32.45	551.332	7.11356
Je	21337.5	133.815	1.36314	0.719863	1.67366	0.0899079	1.3126	550.586	7.11311	554.992	6.98007	532.405	22.7555	554.992	6.98007
Je	33006.3	81.8345	1.44834	0.772482	1.81983	0.0929775	1.37342	581.186	8.05335	573.123	7.53164	612.804	25.8165	573.123	7.53164
Je	6552.9	73.5332	0.881136	0.776714	2.06204	0.0966435	1.13459	583.607	9.15342	594.708	6.44562	540.645	37.6674	594.708	6.44562
Je	13275.6	352.91	2.33225	0.803177	1.48417	0.0968335	1.01368	598.619	6.71262	595.825	5.76905	609.196	23.4379	595.825	5.76905
Je	11253.1	94.858	2.91844	0.808432	1.47511	0.0972837	1.08791	601.574	6.69579	598.471	6.21772	613.267	21.5418	598.471	6.21772
Je	267266	509.965	11.9483	0.806724	1.46647	0.0979876	1.28769	600.615	6.64879	602.605	7.40803	593.131	15.1894	602.605	7.40803
Je	43004	373.947	2.33549	0.834662	1.486	0.0985782	1.24447	616.195	6.86452	606.071	7.19868	653.552	17.4265	606.071	7.19868
Je	36938.8	527.558	1.6733	0.855136	1.83437	0.103518	1.54196	627.464	8.5859	634.993	9.32457	600.398	21.4972	634.993	9.32457
Je	9417.08	118.397	2.03661	0.888749	1.46308	0.106259	1.19131	645.697	6.99052	650.983	7.37649	627.236	18.3263	650.983	7.37649
Je	13647.2	154.81	4.93191	1.04672	1.93597	0.109803	1.3999	727.257	10.0534	671.604	8.92864	902.832	27.5882	671.604	8.92864
Je	5656.56	63.5892	1.89261	0.945262	1.84059	0.111625	1.3696	675.632	9.08181	682.176	8.86575	653.86	26.3855	682.176	8.86575
Je	12138.5	167.056	1.66525	1.19983	1.46032	0.123729	1.141	800.509	8.08757	751.99	8.09869	938.023	18.6671	751.99	8.09869
Je	17254.5	1124.43	15.6562	1.22752	1.33058	0.126252	1.13473	813.211	7.44538	766.45	8.20002	943.407	14.2347	766.45	8.20002
Je	8813.38	252.209	1.76213	1.27656	1.47575	0.138621	1.16582	835.319	8.40259	836.862	9.14953	831.223	18.8647	836.862	9.14953
Je	20100	118.037	2.56975	1.6013	1.58015	0.162822	1.28761	970.717	9.87696	972.442	11.6226	966.797	18.6977	966.797	18.6977
Je	68483.5	132.838	2.95091	1.62281	1.35907	0.163476	1.06173	979.079	8.5385	976.064	9.61673	985.834	17.2481	985.834	17.2481
Je	7470.47	126.096	1.06241	1.66837	1.58043	0.166999	1.19854	996.567	10.0338	995.558	11.0564	998.772	20.9251	998.772	20.9251
Je	15522.3	87.6237	1.94755	1.72026	1.41067	0.171781	1.02138	1016.12	9.05839	1021.92	9.65238	1003.63	19.7312	1003.63	19.7312
Je	32950.4	214.976	4.69701	1.71456	1.90182	0.170997	1.56779	1013.99	12.1976	1017.6	14.7584	1006.19	21.8432	1006.19	21.8432
Je	7890.21	111.236	2.18534	1.68911	1.91628	0.168246	1.18331	1004.43	12.2225	1002.44	10.9857	1008.75	30.5712	1008.75	30.5712
Je	78520.2	269.508	0.918395	1.64319	1.4361	0.16353	1.15157	986.939	9.06537	976.366	10.4335	1010.5	17.394	1010.5	17.394
Je	14887.3	79.7905	2.19733	1.75706	1.61911	0.174819	1.22234	1029.76	10.4776	1038.61	11.7254	1011	21.519	1011	21.519
Je	35689.1	262.046	4.86545	1.74943	1.43544	0.173641	1.18176	1026.95	9.27432	1032.14	11.271	1015.9	16.5079	1015.9	16.5079
Je	7107.66	88.4129	1.08708	1.72517	1.47149	0.171089	1.12172	1017.95	9.45881	1018.11	10.5641	1017.59	19.2899	1017.59	19.2899
Je	10796.2	71.1986	2.5239	1.73283	1.55251	0.171828	1.1119	1020.8	9.99591	1022.18	10.5104	1017.84	21.9453	1017.84	21.9453
Je	39626.2	258.11	3.42582	1.71167	1.44313	0.169348	1.16195	1012.91	9.24978	1008.52	10.8478	1022.41	17.3228	1022.41	17.3228
Je	13513.7	155.788	1.59416	1.73971	1.42762	0.172117	0.997064	1023.36	9.20506	1023.77	9.43832	1022.46	20.6986	1022.46	20.6986
Je	60461.2	140.652	1.63656	1.80395	1.33074	0.178291	1.00299	1046.89	8.69337	1057.63	9.78346	1024.53	17.6944	1024.53	17.6944
Je	8854.52	89.703	0.669927	1.7657	1.72426	0.174274	1.37019	1032.94	11.178	1035.62	13.1087	1027.27	21.1893	1027.27	21.1893
Je	26434.1	101.092	2.14229	1.76145	1.64205	0.173202	1.14633	1031.38	10.6357	1029.73	10.9096	1034.87	23.7699	1034.87	23.7699
Je	35130.4	197.34	2.65264	1.85039	1.57174	0.181736	1.2627	1063.57	10.3606	1076.45	12.5181	1037.21	18.9191	1037.21	18.9191
Je	53414.6	247.217	1.69816	1.81022	1.8268	0.177367	1.55904	1049.16	11.949	1052.58	15.1404	1042.02	19.2334	1042.02	19.2334
Je	520679	103.794	2.35504	1.83944	1.53525	0.180147	1.19344	1059.66	10.0989	1067.78	11.7438	1042.99	19.5046	1042.99	19.5046
Je	30641.5	150.712	1.95366	1.77541	1.32463	0.173697	0.949892	1036.5	8.60414	1032.45	9.06208	1045.08	18.6405	1045.08	18.6405
Je	31303.9	142.753	2.28766	1.82329	1.29484	0.178165	1.05456	1053.87	8.49096	1056.94	10.2803	1047.53	15.1688	1047.53	15.1688
Je	16037.3	123.172	2.06136	1.73037	1.59853	0.168941	1.19131	1019.89	10.2868	1006.27	11.0991	1049.25	21.5045	1049.25	21.5045
Je	1.91727e+07	245.392	2.94083	1.7412	1.37136	0.16992	1.13951	1023.91	8.84502	1011.67	10.6691	1050.17	15.3974	1050.17	15.3974
Je	33247	521.607	4.40901	1.89343	1.43867	0.184769	1.25519	1078.79	9.55958	1092.98	12.619	1050.25	14.1882	1050.25	14.1882
Je	23434.5	265.631	1.20941	1.79678	1.41169	0.175314	1.16659	1044.29	9.20912	1041.32	11.2175	1050.52	16.0412	1050.52	16.0412
Je	60364.3	96.8001	2.24704	1.79026	1.53194	0.174499	1.169	1041.92	9.98063	1036.85	11.1963	1052.58	19.9668	1052.58	19.9668
Je	34228.5	289.617	3.54124	1.75084	1.34393	0.170437	1.02385	1027.47	8.68556	1014.52	9.61105	1055.18	17.5518	1055.18	17.5518
Je	7796.14	66.1944	2.01959	1.79939	1.67696	0.174408	1.14163	1045.24	10.9454	1036.35	10.9293	1063.87	24.7068	1063.87	24.7068
Je	36462.6	222.034	2.75792	1.90689	1.51585	0.184749	1.12684	1083.5	10.0971	1092.86	11.3275	1064.74	20.3724	1064.74	20.3724
Je	169888	179.367	1.28531	1.75225	1.34031	0.169309	0.995501	1027.99	8.66468	1008.3	9.29205	1070.15	18.0153	1070.15	18.0153
Je	73132.1	76.47	1.67289	1.72892	1.64322	0.166317	1.2636	1019.35	10.5713	991.788	11.6158	1079	21.0806	1079	21.0806
Je	10253.5	59.7226	1.45617	1.8056	2.18973	0.173573	1.15573	1047.49	14.3102	1031.77	11.0191	1080.4	37.3193	1080.4	37.3193
Je	66917	420.734	8.93983	1.85451	1.25743	0.178052	1.00049	1065.04	8.2951	1056.32	9.74796	1082.91	15.2708	1082.91	15.2708
Je	9826.48	65.7171	1.7397	1.87444	1.9504	0.179961	1.35655	1072.1	12.915	1066.76	13.3373	1082.95	28.0876	1082.95	28.0876
Je	102982	441.868	1.64056	1.9286	1.63675	0.184786	1.44941	1091.05	10.9449	1093.07	14.5727	1087.03	15.2416	1087.03	15.2416
Je	32456	79.4764	1.78224	1.9084	1.43837	0.182562	1.22252	1084.03	9.58357	1080.96	12.1664	1090.18	15.1917	1090.18	15.1917
Je	28039.5	348.666	2.30739	1.85351	1.52266	0.176725	1.24397	1064.68	10.043	1049.06	12.0434	1096.83	17.5918	1096.83	17.5918
Je	147119	365.795	2.04876	1.98328	1.52445	0.188141	1.2038	1109.84	10.2908	1111.3	12.2882	1106.96	18.7117	1106.96	18.7117
Je	6629.46	55.286	3.01754	2.07124	1.89838	0.195955	1.32179	1139.34	13.0003	1153.56	13.9612	1112.35	27.2209	1112.35	27.2209
Je	13927.2	215.165	2.77845	2.04695	1.53046	0.192185	1.24731	1131.28	10.4402	1133.2	12.9619	1127.57	17.6789	1127.57	17.6789
Je	14986.6	102.628	2.56963	2.12953	1.74875	0.19944	1.31706	1158.43	12.0832	1172.31	14.1176	1132.55	22.9037	1132.55	22.9037
Je	15820.7	208.249	1.75958	2.101	1.05697	0.195695	0.816644	1149.13	7.27147	1152.15	8.6161	1143.46	13.3224	1143.46	13.3224
Je	55420.2	114.648	2.13469	2.05091	1.44212	0.190799	1.15283	1132.6	9.84377	1125.7	11.9076	1145.83	17.1979	1145.83	17.1979
Je	565484	156.827	2.97904	2.04079	1.53816	0.189045	1.28049	1129.23	10.4824	1116.2	13.1238	1154.35	16.9239	1154.35	16.9239
Je	58212	104.645	1.83056	2.10027	1.42506	0.191661	1.13526	1148.9	9.80288	1130.37	11.7705	1184.06	17.0207	1184.06	17.0207
Je	119433	1695.08	2.8528	2.10375	1.66216	0.19084	1.4356	1150.03	11.4401	1125.92	14.8309	1195.79	16.5079	1195.79	16.5079
Je	75360.2	899.552	5.43096	2.20709	1.90789	0.199746	1.70173	1183.29	13.3327	1173.96	18.2641	1200.38	17.0042	1200.38	17.0042
Je	124324	463.148	1.45985	2.23981	1.37965	0.201908	1.06257	1193.6	9.68508	1185.56	11.5069	1208.18	17.3183	1208.18	17.3183
Je	120749	670.267	6.36232	2.33632	1.51916	0.209881	1.24161	1223.4	10.8022	1228.18	13.8846	1214.98	17.2189	1214.98	17.2189
Je	23548.4	49.2477	2.79253	2.3781	1.6068	0.21269	1.09469	1236.04	11.486	1243.13	12.3767	1223.68	23.1272	1223.68	23.1272
Je	20585.1	191.986	1.73757	2.38127	1.43082	0.209475	1.12498	1236.99	10.232	1226.02	12.5603	1256.18	17.2711	1256.18	17.2711
Je	33508.1	260.001	1.12993	2.31524	1.3772	0.203071	1.07686	1216.97	9.76611	1191.8	11.7175	1261.88	16.7752	1261.88	16.7752
Je	74579.8	312.838	4.37067	2.31667	1.22731	0.202736	0.933247	1217.41	8.70475	1190	10.1409	1266.31	15.565	1266.31	15.565
Je	100285	203.213	1.87389	2.36558	1.36084	0.20685	1.1695	1232.27	9.71244	1212.01	12.9218	1267.86	13.5662	1267.86	13.5662
Je	9107.82	46.4757	0.482819	2.50172	1.4883	0.217822	1.05896	1272.53	10.7968	1270.36	12.21	1276.19	20.3752	1276.19	20.3752
Je	44274.6	326.338	2.8768	2.76823	1.45542	0.232044	1.18214	1347.01	10.8567	1345.21	14.3527	1349.86	16.3851	1349.86	16.3851
Je	37087.3	153.256	1.05343	2.86568	1.5222	0.235985	1.31106	1372.94	11.4583	1365.79	16.1366	1384.06	14.8548	1384.06	14.8548
Je	3708.29	51.4752	1.32532	3.07015	1.627	0.252645	1.29246	1425.27	12.462	1452.1	16.8043	1385.41	18.9778	1385.41	18.9778
Je	6717.96	71.2497	1.70683	3.01909	1.45266	0.246688	1.02016	1412.45	11.0805	1421.37	13.013	1399.01	19.8224	1399.01	19.8224
Je	54475.8	632.858	2.17629	3.1122	1.74405	0.252588	1.57843	1435.71	13.4032	1451.81	20.5186	1411.91	14.1936	1411.91	14.1936
Je	260857	128.713	1.22721	3.08048	1.38242	0.249913	1.13784	1427.85	10.5972	1438.03	14.6659	1412.69	15.0205	1412.69	15.0205
Je	36019.2	121.023	2.52934	2.96692	1.49349	0.239982	1.28519	1399.19	11.3423	1386.6	16.0343	1418.39	14.5438	1418.39	14.5438
Je	37051.4	107.38	1.31627	3.17204	1.38209	0.255941	1.08026	1450.38	10.6702	1469.04	14.1912	1423.12	16.47	1423.12	16.47
Je	42848.1	536.023	2.75198	2.99432	1.62792	0.241574	1.36804	1406.18	12.392	1394.87	17.1592	1423.33	16.8571	1423.33	16.8571
Je	107828	423.226	1.71127	3.15294	1.41357	0.254252	1.17554	1445.72	10.8974	1460.37	15.3615	1424.22	14.9958	1424.22	14.9958
Je	2.52711e+06	617.343	1.85675	3.18601	1.65834	0.256372	1.37565	1453.77	12.8166	1471.25	18.0959	1428.29	17.6807	1428.29	17.6807
Je	105123	1151.97	1.88822	3.13134	1.49561	0.25169	1.25456	1440.43	11.5108	1447.18	16.2622	1430.44	15.5395	1430.44	15.5395
Je	38784.6	440.179	1.66087	3.14424	1.29984	0.252556	1.0421	1443.59	10.0139	1451.65	13.5453	1431.72	14.8255	1431.72	14.8255
Je	17102.4	136.494	1.73395	3.12794	1.37031	0.251195	1.10612	1439.59	10.5436	1444.63	14.3155	1432.12	15.434	1432.12	15.434
Je	211699	359.605	3.33459	3.08799	1.53822	0.247472	1.3419	1429.71	11.7987	1425.43	17.1608	1436.08	14.3403	1436.08	14.3403
Je	38020.1	931.873	3.86694	2.73752	1.41606	0.219345	1.28259	1338.7	10.5317	1278.41	14.8733	1436.43	11.4451	1436.43	11.4451
Je	31682.8	94.6188	1.39329	3.14754	1.6048	0.251981	1.29079	1444.4	12.3667	1448.69	16.7473	1438.07	18.1805	1438.07	18.1805
Je	73195.8	357.826	1.78019	3.03451	1.53737	0.242668	1.31336	1416.34	11.7416	1400.55	16.5334	1440.16	15.2317	1440.16	15.2317
Je	671685	457.105	2.10683	3.15201	1.52722	0.251634	1.25519	1445.49	11.7728	1446.9	16.2675	1443.41	16.5755	1443.41	16.5755
Je	36818.5	248.066	0.867853	3.14721	1.49873	0.251233	1.35966	1444.32	11.5489	1444.83	17.5991	1443.54	12.0119	1443.54	12.0119
Je	230679	1235.73	2.20713	3.06965	1.8358	0.244656	1.59935	1425.15	14.061	1410.86	20.2661	1446.54	17.1636	1446.54	17.1636
Je	40363.4	369.307	1.84009	3.14971	1.6476	0.250962	1.34442	1444.93	12.6986	1443.43	17.3868	1447.11	18.1367	1447.11	18.1367
Je	125411	422.182	1.21642	3.20218	1.30829	0.254523	1.08903	1457.69	10.1233	1461.76	14.2431	1451.74	13.7976	1451.74	13.7976
Je	24774.4	99.0918	1.65791	3.11894	1.61871	0.247785	1.27591	1437.37	12.4464	1427.04	16.3333	1452.67	18.955	1452.67	18.955
Je	13524.2	61.5208	1.63268	3.29213	1.56378	0.260446	1.24599	1479.19	12.1795	1492.13	16.5969	1460.67	17.9615	1460.67	17.9615
Je	30269.3	184.208	2.09525	3.14178	1.2394	0.248175	0.997108	1442.99	9.54648	1429.06	12.7804	1463.56	13.9869	1463.56	13.9869
Je	23498	61.9195	1.99285	3.30049	1.8236	0.259873	1.38895	1481.17	14.2117	1489.19	18.4689	1469.68	22.4341	1469.68	22.4341
Je	450778	141.545	1.89851	3.25649	1.43032	0.255868	1.14319	1470.73	11.1116	1468.67	15.0145	1473.68	16.3107	1473.68	16.3107
Je	615399	129.507	1.59687	3.22141	1.68491	0.253057	1.37913	1462.32	13.0563	1454.22	17.9545	1474.09	18.3657	1474.09	18.3657
Je	64368.8	420.985	3.33162	3.39912	1.53128	0.262566	1.20187	1504.19	12.0145	1502.96	16.1124	1505.91	17.9256	1505.91	17.9256
Je	122054	236.625	2.76673	3.27684	1.39376	0.251789	1.18158	1475.57	10.8434	1447.7	15.321	1515.88	13.9461	1515.88	13.9461
Je	84458.5	129.966	2.57516	3.44171	1.3231	0.262515	0.918197	1513.98	10.4102	1502.69	12.3076	1529.77	17.9399	1529.77	17.9399
Je	85264.5	315.559	2.14503	3.75609	1.29401	0.274276	1.0167	1583.41	10.377	1562.47	14.107	1611.41	14.9143	1611.41	14.9143
Je	179348	401.747	4.0191	4.06171	1.20771	0.291849	0.926143	1646.65	9.84053	1650.76	13.4879	1641.39	14.3875	1641.39	14.3875
Je	585438	171.633	1.07777	4.02974	1.37831	0.289468	0.930685	1640.22	11.2131	1638.87	13.4682	1641.93	18.8692	1641.93	18.8692
Je	481822	337.841	1.60834	4.03905	1.48089	0.289662	1.25894	1642.1	12.0533	1639.84	18.2281	1644.97	14.4678	1644.97	14.4678
Je	432973	181.705	1.85974	4.12586	1.42157	0.295783	1.06336	1659.44	11.6189	1670.36	15.6473	1645.62	17.5028	1645.62	17.5028
Je	15139.7	103.106	1.43683	4.05626	1.52601	0.289869	1.33291	1645.56	12.4309	1640.87	19.3097	1651.53	13.7715	1651.53	13.7715
Je	30275.9	69.0699	1.93213	4.12858	1.49521	0.294406	1.24481	1659.98	12.2224	1663.51	18.2515	1655.49	15.3453	1655.49	15.3453
Je	108184	650.781	18.5083	3.67123	1.36644	0.260445	1.14915	1565.13	10.9048	1492.12	15.3069	1665.05	13.6798	1665.05	13.6798
Je	902449	312.848	1.11777	3.94566	1.50955	0.279855	1.20713	1623.1	12.2291	1590.63	17.0155	1665.44	16.7711	1665.44	16.7711
Je	38479.1	230.787	2.12778	3.63116	1.80369	0.255631	1.65468	1556.39	14.3607	1467.45	21.7164	1679.25	13.26	1679.25	13.26
Je	137753	108.969	1.34732	4.2222	1.38765	0.295307	1.06989	1678.35	11.3923	1667.99	15.7239	1691.29	16.2967	1691.29	16.2967
Je	541297	488.354	3.57789	4.14552	1.42551	0.289382	1.03717	1663.33	11.6619	1638.44	15.0058	1694.87	18.0271	1694.87	18.0271
Je	141392	153.684	5.32289	4.34266	1.9049	0.302422	1.68441	1701.5	15.7229	1703.31	25.2134	1699.26	16.3892	1699.26	16.3892
Je	72364.5	221.827	5.46945	4.3123	1.31781	0.300003	1.18483	1695.71	10.8624	1691.32	17.6261	1701.13	10.6248	1701.13	10.6248
Je	23019.5	239.178	1.49481	4.24156	1.30392	0.294777	1.02781	1682.1	10.7142	1665.36	15.0844	1703.04	14.7751	1703.04	14.7751
Je	112649	892.576	5.63504	4.30526	1.65075	0.299073	1.50173	1694.37	13.6029	1686.71	22.2872	1703.84	12.6197	1703.84	12.6197
Je	109094	337.512	2.29341	4.50527	1.62545	0.30963	1.35383	1731.94	13.5074	1738.89	20.6338	1723.55	16.5243	1723.55	16.5243
Je	4.16413e+06	456.977	2.28691	4.31464	1.43858	0.294743	1.27392	1696.16	11.8592	1665.19	18.6949	1734.64	12.2574	1734.64	12.2574
Je	18260.9	349.742	2.64731	3.8079	1.68201	0.259367	1.47515	1594.42	13.5274	1486.6	19.5848	1740	14.8121	1740	14.8121
Je	146303	485.51	2.10266	4.67434	1.52518	0.317523	1.31673	1762.66	12.7579	1777.62	20.4566	1744.95	14.0986	1744.95	14.0986
Je	20330.3	203.198	1.81418	4.50452	1.55886	0.303958	1.32773	1731.81	12.9536	1710.91	19.9517	1757.13	14.9394	1757.13	14.9394
Je	76006.7	83.0308	1.03338	5.18502	1.45568	0.33921	1.12785	1850.16	12.3915	1882.87	18.4159	1813.57	16.7154	1813.57	16.7154
Je	35712.3	97.1426	0.895704	5.12054	1.38326	0.332778	1.10105	1839.52	11.7511	1851.83	17.7224	1825.6	15.1857	1825.6	15.1857
Je	100932	421.052	2.15026	5.09121	1.56111	0.328883	1.2877	1834.64	13.2497	1832.96	20.5441	1836.53	15.9869	1836.53	15.9869
Je	49829.5	381.361	2.17541	5.07216	1.2226	0.327426	1.04998	1831.46	10.37	1825.89	16.6957	1837.78	11.3438	1837.78	11.3438
Je	21703.9	98.309	1.2488	5.13043	1.40689	0.328966	1.1337	1841.16	11.9557	1833.37	18.0907	1849.96	15.0647	1849.96	15.0647
Je	14917.1	66.2824	1.2405	4.44671	3.43995	0.284338	3.26169	1721.09	28.5233	1613.17	46.5505	1854.96	19.7529	1854.96	19.7529
Je	27065.1	91.1222	1.06767	5.14891	1.35717	0.327884	1.13036	1844.21	11.5398	1828.12	17.9927	1862.41	13.5617	1862.41	13.5617
Je	16373.1	31.848	1.1213	5.68844	1.68179	0.354041	1.29793	1929.62	14.5245	1953.86	21.8773	1903.65	19.2153	1903.65	19.2153
Je	13846.5	62.5436	0.634217	5.52913	1.56986	0.343967	1.33477	1905.14	13.4995	1905.72	22.0218	1904.48	14.8448	1904.48	14.8448
Je	19377.1	84.9006	1.83878	5.48148	1.24316	0.340556	0.870027	1897.7	10.6757	1889.34	14.248	1906.84	15.9497	1906.84	15.9497
Je	11752.7	25.5887	1.26364	6.9684	1.39251	0.389502	0.797508	2107.41	12.3655	2120.52	14.4113	2094.63	20.0605	2094.63	20.0605
Je	3.16668e+06	336.343	4.08008	6.50552	1.0817	0.354286	0.910555	2046.65	9.52033	1955.03	15.3557	2140.25	10.2079	2140.25	10.2079
Je	164802	445.999	3.06668	7.26952	1.23475	0.379266	1.08248	2145.07	11.0218	2072.85	19.1882	2214.95	10.2991	2214.95	10.2991
Je	18401.6	164.354	6.64367	9.24268	1.5966	0.387873	1.48015	2362.35	14.6299	2112.96	26.6665	2585.18	9.99327	2585.18	9.99327
Je	25481.6	143.058	0.816965	14.3315	1.53676	0.529439	1.33527	2771.9	14.5873	2739.09	29.7971	2795.86	12.4521	2795.86	12.4521
Je	34732.6	47.1315	1.16238	15.2577	1.24463	0.55199	1.0404	2831.46	11.8609	2833.44	23.8541	2830.05	11.1436	2830.05	11.1436
Je	1.16673e+06	166.573	1.15917	15.3014	1.26962	0.551289	1.12908	2834.19	12.1012	2830.53	25.8662	2836.78	9.46493	2836.78	9.46493
Je	76619.5	291.628	1.3537	16.378	1.62255	0.540364	1.37332	2899.13	15.5283	2784.97	31.0567	2979.38	13.913	2979.38	13.913
Je	86885.8	300.31	0.77939	17.3528	1.18756	0.572152	0.905892	2954.54	11.4018	2916.65	21.2526	2980.44	12.3622	2980.44	12.3622
IPq	162.113	162.113	1.78362	0.390855	2.07806	0.0511859	1.42893	334.994	5.92962	321.798	4.48537	427.634	33.6453	321.798	4.48537
IPq	113.792	113.792	5.49274	0.399649	1.76423	0.0550048	1.2719	341.394	5.11504	345.175	4.2748	315.706	27.8073	345.175	4.2748
IPq	490.96	490.96	3.07188	0.480124	1.72402	0.0592887	1.54929	398.158	5.67847	371.298	5.58996	557.194	16.4914	371.298	5.58996
IPq	102.508	102.508	0.982227	0.421856	1.45378	0.060294	0.766965	357.377	4.37966	377.413	2.81152	229.214	28.5283	377.413	2.81152
IPq	146.561	146.561	2.51844	0.469103	1.46	0.0620995	1.16312	390.569	4.73371	388.381	4.38395	403.525	19.761	388.381	4.38395
IPq	690.46	690.46	3.1443	0.7925	9.04913	0.0635199	1.85169	592.589	40.6451	396.997	7.12938	1435.82	169.258	396.997	7.12938
IPq	86.2003	86.2003	2.70159	0.491135	1.74235	0.0658719	1.16616	405.684	5.82712	411.237	4.6459	374.17	29.1243	411.237	4.6459
IPq	114.179	114.179	5.91707	0.505486	1.47684	0.0660632	1.01722	415.409	5.03498	412.394	4.06357	432.17	23.867	412.394	4.06357
IPq	99.0139	99.0139	1.46106	0.519404	1.77328	0.0669064	1.38968	424.753	6.15524	417.491	5.61791	464.362	24.407	417.491	5.61791
IPq	140.625	140.625	1.35499	0.511166	1.26921	0.0669718	0.900032	419.233	4.3593	417.886	3.64179	426.63	19.9587	417.886	3.64179
IPq	61.1023	61.1023	2.88261	0.487054	2.43753	0.0670577	1.20437	402.901	8.10661	418.405	4.87911	314.949	48.2067	418.405	4.87911
IPq	110.54	110.54	7.1308	0.503798	1.64198	0.0673691	1.26387	414.27	5.58561	420.286	5.14241	380.878	23.5657	420.286	5.14241
IPq	121.828	121.828	1.0177	0.507055	1.51096	0.0673909	1.13969	416.467	5.16193	420.418	4.63857	394.618	22.2488	420.418	4.63857
IPq	169.87	169.87	1.79895	0.517236	1.32425	0.0674185	1.07307	423.303	4.58395	420.584	4.36908	438.117	17.2913	420.584	4.36908
IPq	174.16	174.16	2.55436	0.510957	1.38397	0.0675893	1.06763	419.092	4.75217	421.616	4.35725	405.205	19.714	421.616	4.35725
IPq	105.937	105.937	4.80408	0.503638	1.75254	0.0677142	1.37004	414.162	5.96044	422.37	5.60115	368.662	24.6014	422.37	5.60115
IPq	49.0683	49.0683	0.737642	0.503632	1.69461	0.0677308	0.821298	414.158	5.76336	422.47	3.35849	368.082	33.3915	422.47	3.35849
IPq	49.9916	49.9916	2.10462	0.501316	2.03005	0.0680759	1.14386	412.593	6.88308	424.553	4.69983	346.219	37.9156	424.553	4.69983
IPq	139.604	139.604	1.83516	0.518366	1.21513	0.0681013	0.973841	424.059	4.21226	424.706	4.00267	420.521	16.2253	424.706	4.00267
IPq	122.641	122.641	2.99985	0.515816	1.69772	0.0681061	1.20006	422.352	5.8661	424.735	4.93278	409.342	26.8644	424.735	4.93278
IPq	401.745	401.745	5.67357	0.517793	1.52952	0.068111	1.35502	423.676	5.29825	424.765	5.57011	417.733	15.8481	424.765	5.57011
IPq	136.175	136.175	3.31318	0.51545	1.6669	0.068191	1.12453	422.108	5.75692	425.248	4.62771	404.97	27.5468	425.248	4.62771
IPq	64.5385	64.5385	1.5239	0.519091	1.72569	0.0682982	1.35331	424.544	5.98766	425.895	5.57741	417.194	23.9201	425.895	5.57741
IPq	71.5706	71.5706	1.65003	0.503011	2.02023	0.0683368	1.31005	413.739	6.86521	426.128	5.40199	345.21	34.7861	426.128	5.40199
IPq	229.863	229.863	2.04724	0.519985	1.58232	0.0683648	1.28672	425.141	5.49641	426.297	5.3078	418.859	20.5667	426.297	5.3078
IPq	209.791	209.791	1.34925	0.514197	1.60444	0.0685134	1.24824	421.267	5.5323	427.193	5.15955	388.934	22.631	427.193	5.15955
IPq	111.687	111.687	1.07215	0.527543	1.46132	0.0685368	1.00321	430.178	5.1244	427.334	4.14806	445.415	23.6211	427.334	4.14806
IPq	76.0865	76.0865	3.12363	0.503253	2.14879	0.068545	1.55616	413.902	7.30441	427.384	6.4351	339.433	33.5375	427.384	6.4351
IPq	167.236	167.236	1.79657	0.524717	1.48805	0.0685571	1.22756	428.298	5.19982	427.457	5.07708	432.805	18.7381	427.457	5.07708
IPq	219.707	219.707	1.07125	0.513153	1.45429	0.0685698	1.21326	420.567	5.0078	427.534	5.01882	382.521	18.0219	427.534	5.01882
IPq	153.495	153.495	4.34761	0.525081	1.43005	0.0686243	0.992153	428.54	4.99938	427.862	4.10723	432.166	22.9679	427.862	4.10723
IPq	80.1035	80.1035	0.982601	0.516409	1.78389	0.0686638	1.4223	422.75	6.16852	428.101	5.89112	393.646	24.1523	428.101	5.89112
IPq	185.289	185.289	1.11887	0.520543	1.34372	0.0687692	0.998276	425.514	4.67089	428.736	4.14075	408.077	20.1254	428.736	4.14075
IPq	197.85	197.85	3.31037	0.517364	1.11526	0.0688564	0.85672	423.389	3.86113	429.262	3.5578	391.511	16.0222	429.262	3.5578
IPq	80.8121	80.8121	2.06057	0.519256	1.62951	0.0688762	0.912643	424.655	5.65514	429.382	3.79106	399.052	30.2534	429.382	3.79106
IPq	53.4297	53.4297	1.00243	0.506393	1.77128	0.0690561	1.37211	416.021	6.04606	430.466	5.71359	336.674	25.3665	430.466	5.71359
IPq	272.213	272.213	9.54223	0.531349	1.25749	0.0691586	1.02262	432.705	4.4304	431.084	4.26419	441.317	16.2821	431.084	4.26419
IPq	206.257	206.257	2.06122	0.522979	1.46138	0.0691867	1.25443	427.139	5.09552	431.254	5.23281	404.976	16.7825	431.254	5.23281
IPq	296.396	296.396	1.33873	0.524422	1.41762	0.0694348	1.11354	428.101	4.95185	432.75	4.66066	403.131	19.6468	432.75	4.66066
IPq	73.1432	73.1432	1.23284	0.502424	2.02999	0.0695335	1.15065	413.342	6.89299	433.345	4.82236	303.125	38.1333	433.345	4.82236
IPq	144.041	144.041	5.63865	0.522253	1.62337	0.0695506	1.02164	426.655	5.65516	433.448	4.28268	390.103	28.3167	433.448	4.28268
IPq	116.112	116.112	1.41019	0.525231	1.34437	0.0695886	0.997429	428.64	4.70076	433.677	4.18333	401.631	20.1904	433.677	4.18333
IPq	169.623	169.623	1.26123	0.528845	1.4659	0.0695982	1.06475	431.043	5.14876	433.735	4.46624	416.66	22.5103	433.735	4.46624
IPq	195.092	195.092	1.92372	0.509019	2.3312	0.069734	1.07713	417.789	7.98468	434.553	4.52642	326.27	46.9128	434.553	4.52642
IPq	24.1822	24.1822	2.34359	0.473238	2.58729	0.0699101	1.18395	393.423	8.43899	435.614	4.98707	152.378	53.8929	435.614	4.98707
IPq	555.711	555.711	1.6994	0.551667	1.93506	0.0700803	1.59706	446.088	6.98569	436.639	6.74247	495.113	24.0717	436.639	6.74247
IPq	96.6352	96.6352	1.53642	0.518687	1.54327	0.0702223	0.96753	424.274	5.35195	437.495	4.09245	353.034	27.1633	437.495	4.09245
IPq	132.812	132.812	2.7434	0.541132	1.25095	0.0703793	0.918468	439.17	4.46	438.44	3.89305	442.978	18.9085	438.44	3.89305
IPq	265.094	265.094	2.41429	0.530725	1.4499	0.0706866	1.11411	432.291	5.1044	440.291	4.74156	389.858	20.8281	440.291	4.74156
IPq	372.12	372.12	5.01005	0.53563	1.37741	0.0707636	1.1062	435.539	4.87836	440.754	4.71266	408.038	18.3635	440.754	4.71266
IPq	237.194	237.194	2.82039	0.529809	1.31874	0.0710697	1.03337	431.683	4.63739	442.597	4.42019	373.829	18.4297	442.597	4.42019
IPq	411.708	411.708	1.94546	0.555294	2.01127	0.0715619	1.66027	448.459	7.29154	445.559	7.14764	463.342	25.1643	445.559	7.14764
IPq	267.173	267.173	2.48997	0.542036	1.39044	0.0718668	0.994439	439.766	4.9627	447.393	4.29817	400.018	21.7748	447.393	4.29817
IPq	464.05	464.05	148.45	0.555904	1.37118	0.0718753	1.10937	448.857	4.97444	447.444	4.79544	456.11	17.8908	447.444	4.79544
IPq	80.7111	80.7111	1.66104	0.526429	1.7684	0.0723215	1.0822	429.437	6.1927	450.127	4.70508	319.906	31.7799	450.127	4.70508
IPq	407.078	407.078	1.341	0.554017	1.53454	0.0725464	1.24915	447.625	5.55493	451.479	5.4467	427.847	19.8744	451.479	5.4467
IPq	192.827	192.827	3.73379	0.562798	1.46547	0.0728503	1.11625	453.346	5.35872	453.305	4.88622	453.576	21.0888	453.305	4.88622
IPq	138.284	138.284	2.3065	0.61082	1.40779	0.0779886	0.821318	484.077	5.4205	484.106	3.83042	483.965	25.2411	484.106	3.83042
IPq	180.232	180.232	3.64554	0.702799	1.77451	0.0808024	1.06806	540.462	7.43677	500.911	5.14744	711.001	30.1242	500.911	5.14744
IPq	74.7621	74.7621	1.52026	0.677941	1.54658	0.0839274	1.216	525.529	6.34489	519.523	6.06951	551.723	20.8608	519.523	6.06951
IPq	190.155	190.155	2.03975	0.687249	1.63403	0.0873133	1.35686	531.146	6.7582	539.628	7.02393	494.895	20.0464	539.628	7.02393
IPq	139.175	139.175	0.869277	0.696146	1.44219	0.087366	1.15018	536.486	6.01029	539.941	5.95733	521.807	19.0981	539.941	5.95733
IPq	549.589	549.589	1.49424	0.727465	1.43801	0.0890553	1.19793	555.064	6.14893	549.947	6.31481	576.13	17.2921	549.947	6.31481
IPq	275.834	275.834	1.32119	0.750428	1.26944	0.0931743	1.08217	568.473	5.52601	574.283	5.94593	545.276	14.5006	574.283	5.94593
IPq	119.438	119.438	7.32744	0.777455	1.54587	0.0981777	1.2675	584.031	6.86572	603.72	7.30478	508.176	19.4722	603.72	7.30478
IPq	93.9269	93.9269	1.75853	0.887894	1.09695	0.108109	0.855425	645.237	5.23847	661.759	5.37998	587.854	14.8879	661.759	5.37998
IPq	203.351	203.351	4.46905	1.3668	1.50776	0.143938	1.22642	874.792	8.84133	866.895	9.94789	894.838	18.1158	866.895	9.94789
IPq	285.068	285.068	2.58974	1.50304	1.23086	0.157466	1.07238	931.619	7.50494	942.679	9.40468	905.522	12.4681	905.522	12.4681
IPq	100.675	100.675	1.58399	1.4924	1.25418	0.153853	1.01054	927.296	7.62547	922.523	8.68613	938.681	15.216	938.681	15.216
IPq	183.439	183.439	9.59567	1.55839	1.34809	0.159457	1.0915	953.829	8.3381	953.759	9.67682	953.973	16.1814	953.973	16.1814
IPq	102.888	102.888	5.96523	1.53565	1.48434	0.156119	1.17236	944.764	9.12803	935.175	10.2055	967.198	18.5783	967.198	18.5783
IPq	132.32	132.32	1.32424	1.61923	1.3433	0.163895	1.0509	977.692	8.43231	978.386	9.53966	976.124	17.0334	976.124	17.0334
IPq	36.3446	36.3446	2.52922	1.66406	1.37156	0.167756	0.917422	994.924	8.69925	999.736	8.49598	984.313	20.7361	984.313	20.7361
IPq	186.912	186.912	6.39638	1.5602	1.36571	0.157097	1.03384	954.547	8.45093	940.622	9.04833	986.793	18.1466	986.793	18.1466
IPq	19.8103	19.8103	1.06801	1.73026	1.87653	0.174197	1.11434	1019.85	12.0757	1035.19	10.657	987.061	30.7248	987.061	30.7248
IPq	63.3629	63.3629	2.33493	1.6845	1.64947	0.169542	1.21403	1002.69	10.5099	1009.58	11.3451	987.615	22.7109	987.615	22.7109
IPq	69.749	69.749	2.16269	1.65806	1.48035	0.166753	1.15739	992.635	9.37654	994.199	10.6633	989.199	18.7752	989.199	18.7752
IPq	206.276	206.276	2.32909	1.69005	1.50303	0.169379	1.1754	1004.78	9.58851	1008.69	10.9751	996.251	19.0359	996.251	19.0359
IPq	151.921	151.921	4.14669	1.63066	1.16769	0.163292	0.99225	982.116	7.34962	975.043	8.97873	997.941	12.5007	997.941	12.5007
IPq	99.0024	99.0024	1.39091	1.72749	1.32195	0.172952	1.02712	1018.82	8.50173	1028.35	9.76299	998.359	16.887	998.359	16.887
IPq	93.3202	93.3202	2.09159	1.64819	1.36686	0.164911	1.10806	988.858	8.63818	984.012	10.112	999.608	16.2497	999.608	16.2497
IPq	27.1009	27.1009	1.43835	1.74876	1.80431	0.174468	1.39951	1026.71	11.6561	1036.68	13.402	1005.49	23.1087	1005.49	23.1087
IPq	169.737	169.737	2.63183	1.71884	1.4651	0.171474	1.0986	1015.59	9.40506	1020.23	10.3663	1005.59	19.6506	1005.59	19.6506
IPq	377.403	377.403	4.24474	1.66091	1.1906	0.165255	0.944602	993.722	7.54606	985.913	8.63576	1010.98	14.6944	1010.98	14.6944
IPq	211.171	211.171	0.758295	1.72759	1.36551	0.171837	1.18542	1018.86	8.78207	1022.22	11.2057	1011.61	13.7414	1011.61	13.7414
IPq	137.644	137.644	3.55275	1.73249	1.27452	0.172074	1.00401	1020.68	8.20534	1023.53	9.50206	1014.55	15.9094	1014.55	15.9094
IPq	42.233	42.233	1.3861	1.80009	1.54248	0.178589	1.17864	1045.49	10.069	1059.26	11.5131	1016.81	20.1562	1016.81	20.1562
IPq	310.047	310.047	2.31622	1.75318	1.44194	0.173759	1.15825	1028.34	9.32353	1032.79	11.0533	1018.85	17.3927	1018.85	17.3927
IPq	176.473	176.473	2.54701	1.68198	1.30769	0.166414	1.08351	1001.73	8.32742	992.323	9.9653	1022.36	14.819	1022.36	14.819
IPq	85.149	85.149	5.83365	1.64149	1.31203	0.162253	0.946036	986.286	8.27889	969.286	8.5137	1024.29	18.413	1024.29	18.413
IPq	179.836	179.836	2.0999	1.69797	1.26955	0.167393	1.07874	1007.77	8.11297	997.73	9.97137	1029.63	13.5515	1029.63	13.5515
IPq	81.7033	81.7033	2.66525	1.72992	1.01463	0.170393	0.820641	1019.72	6.52861	1014.28	7.70179	1031.41	12.0796	1031.41	12.0796
IPq	513.648	513.648	2.59522	1.77256	1.2843	0.17443	1.13936	1035.46	8.3373	1036.47	10.9087	1033.29	11.9944	1033.29	11.9944
IPq	21.2343	21.2343	1.63238	1.826	1.76807	0.179331	1.3432	1054.84	11.6005	1063.32	13.1668	1037.32	23.2372	1037.32	23.2372
IPq	325.848	325.848	3.94641	1.75215	1.28805	0.171216	1.07579	1027.95	8.32669	1018.81	10.138	1047.5	14.3014	1047.5	14.3014
IPq	243.153	243.153	2.27759	1.89114	1.39063	0.18446	1.2246	1077.98	9.23652	1091.29	12.294	1051.18	13.298	1051.18	13.298
IPq	118.904	118.904	1.78245	1.80921	1.2579	0.17637	0.888758	1048.79	8.22606	1047.12	8.58981	1052.3	17.955	1052.3	17.955
IPq	80.8667	80.8667	1.74318	1.79109	1.32795	0.174551	0.986661	1042.22	8.65299	1037.14	9.4523	1052.92	17.9253	1052.92	17.9253
IPq	174.522	174.522	1.83248	1.83728	1.28852	0.179032	0.913372	1058.89	8.47234	1061.68	8.94069	1053.15	18.3298	1053.15	18.3298
IPq	64.7432	64.7432	1.66162	1.84212	1.59003	0.179229	1.22042	1060.62	10.4647	1062.76	11.9574	1056.24	20.5362	1056.24	20.5362
IPq	42.7726	42.7726	1.25706	1.79402	1.53872	0.174528	1.09119	1043.29	10.0323	1037.01	10.4525	1056.47	21.8581	1056.47	21.8581
IPq	17.818	17.818	1.16406	1.85677	1.72981	0.180513	1.34124	1065.84	11.4164	1069.78	13.221	1057.8	22.0003	1057.8	22.0003
IPq	132.627	132.627	2.92896	1.80335	1.35379	0.17522	1.08877	1046.67	8.84291	1040.81	10.4645	1058.95	16.191	1058.95	16.191
IPq	48.2673	48.2673	1.3492	1.81442	1.74492	0.175937	1.39037	1050.67	11.4228	1044.74	13.4098	1063.05	21.2283	1063.05	21.2283
IPq	27.2094	27.2094	1.13516	1.82489	1.6752	0.176278	1.28346	1054.44	10.9887	1046.61	12.399	1070.72	21.6323	1070.72	21.6323
IPq	150.01	150.01	1.38454	1.87677	1.44232	0.180585	1.07648	1072.92	9.55454	1070.17	10.6148	1078.53	19.2642	1078.53	19.2642
IPq	247.704	247.704	1.31446	1.83015	1.12327	0.175842	0.874292	1056.33	7.37565	1044.22	8.42846	1081.44	14.1291	1081.44	14.1291
IPq	451.035	451.035	4.41092	1.99534	1.28621	0.191711	1.09094	1113.93	8.70005	1130.64	11.3135	1081.46	13.6559	1081.46	13.6559
IPq	37.0784	37.0784	0.751502	1.95759	1.41712	0.187348	0.978353	1101.06	9.52432	1106.99	9.95144	1089.32	20.5238	1089.32	20.5238
IPq	357.028	357.028	1.80932	2.03205	1.46118	0.194222	1.33575	1126.3	9.94368	1144.21	14.0042	1091.96	11.8555	1091.96	11.8555
IPq	200.85	200.85	3.75525	2.01119	1.19181	0.191201	1.0054	1119.29	8.08275	1127.88	10.4031	1102.65	12.8159	1102.65	12.8159
IPq	282.461	282.461	5.69234	1.75566	1.87483	0.166683	1.20902	1029.25	12.1291	993.81	11.135	1105.38	28.6543	1105.38	28.6543
IPq	52.6009	52.6009	3.89583	1.93834	1.4527	0.18362	1.10028	1094.43	9.73079	1086.72	11.0035	1109.76	18.9674	1109.76	18.9674
IPq	63.8705	63.8705	1.18113	2.07236	1.32283	0.196208	1.07522	1139.71	9.06023	1154.91	11.3691	1110.87	15.4049	1110.87	15.4049
IPq	321.645	321.645	3.94158	1.97429	1.67618	0.185983	1.49308	1106.77	11.2979	1099.58	15.0937	1120.96	15.2116	1120.96	15.2116
IPq	136.641	136.641	1.86229	1.82759	1.3339	0.171903	0.967506	1055.41	8.7544	1022.59	9.14881	1123.95	18.3055	1123.95	18.3055
IPq	54.1713	54.1713	2.14302	2.14507	1.57264	0.20107	1.27151	1163.46	10.8915	1181.07	13.722	1130.84	18.4301	1130.84	18.4301
IPq	81.9626	81.9626	2.68083	2.03216	1.24502	0.190348	0.976807	1126.34	8.47268	1123.26	10.0694	1132.26	15.3548	1132.26	15.3548
IPq	73.3767	73.3767	3.00042	2.08673	1.0999	0.194614	0.892688	1144.45	7.5502	1146.32	9.37485	1140.92	12.7642	1140.92	12.7642
IPq	255.838	255.838	2.7622	2.11776	1.14207	0.197256	0.963065	1154.61	7.87709	1160.56	10.2286	1143.46	12.201	1143.46	12.201
IPq	278.836	278.836	1.31665	2.12271	1.52055	0.197207	1.29696	1156.22	10.4956	1160.3	13.7721	1148.58	15.7644	1148.58	15.7644
IPq	146.955	146.955	1.70355	2.10216	1.16253	0.19515	0.874057	1149.51	7.99914	1149.22	9.20037	1150.05	15.2028	1150.05	15.2028
IPq	62.7135	62.7135	1.29845	2.10848	1.12946	0.195196	0.83863	1151.58	7.77914	1149.46	8.82918	1155.55	15.0156	1155.55	15.0156
IPq	62.5574	62.5574	3.08176	2.01452	1.50438	0.186355	1.22447	1120.41	10.2083	1101.6	12.3992	1157.07	17.3427	1157.07	17.3427
IPq	90.263	90.263	1.83059	2.1517	1.3335	0.198211	1.088	1165.6	9.24427	1165.7	11.6022	1165.4	15.295	1165.4	15.295
IPq	71.4939	71.4939	2.9337	2.08281	1.23401	0.191659	0.957853	1143.16	8.46566	1130.35	9.93102	1167.53	15.4287	1167.53	15.4287
IPq	164.472	164.472	2.02954	2.1413	1.35827	0.196424	1.12733	1162.25	9.40151	1156.08	11.931	1173.78	15.0117	1173.78	15.0117
IPq	222.545	222.545	2.20947	2.15588	1.05983	0.197478	0.903137	1166.95	7.35156	1161.76	9.60117	1176.6	10.9701	1176.6	10.9701
IPq	198.468	198.468	1.7025	2.22006	1.25014	0.202913	1.01042	1187.39	8.75186	1190.95	10.9875	1180.94	14.5626	1180.94	14.5626
IPq	47.8246	47.8246	1.33773	2.14566	1.27423	0.195606	0.905294	1163.65	8.82546	1151.67	9.54778	1186.05	17.7138	1186.05	17.7138
IPq	32.8321	32.8321	1.25077	2.23084	1.46979	0.2031	0.937451	1190.78	10.3051	1191.95	10.2018	1188.65	22.3523	1188.65	22.3523
IPq	233.108	233.108	3.07616	2.31604	1.31083	0.210682	1.04077	1217.21	9.29638	1232.45	11.6754	1190.28	15.7324	1190.28	15.7324
IPq	257.465	257.465	2.17637	2.36404	1.19445	0.212926	0.983827	1231.81	8.52318	1244.39	11.1335	1209.86	13.3317	1209.86	13.3317
IPq	122.575	122.575	1.78802	2.22607	1.44229	0.199737	1.24448	1189.28	10.1056	1173.91	13.356	1217.32	14.3541	1217.32	14.3541
IPq	30.1489	30.1489	1.46461	2.26617	1.50587	0.202763	1.13039	1201.83	10.6093	1190.15	12.2844	1222.86	19.5498	1222.86	19.5498
IPq	39.0298	39.0298	2.5593	2.42137	1.21003	0.214661	0.859514	1248.96	8.69555	1253.6	9.79196	1240.99	16.6912	1240.99	16.6912
IPq	152.273	152.273	1.33339	2.41674	1.21571	0.21386	0.916093	1247.59	8.73152	1249.35	10.4044	1244.53	15.6446	1244.53	15.6446
IPq	165.472	165.472	2.34632	2.52226	1.33148	0.221336	1.13124	1278.47	9.68155	1288.93	13.2157	1260.93	13.7211	1260.93	13.7211
IPq	38.1112	38.1112	1.96558	2.20147	2.29187	0.192629	1.44484	1181.51	16.0036	1135.6	15.0437	1266.55	34.7232	1266.55	34.7232
IPq	31.2093	31.2093	1.3548	2.52002	1.61656	0.218962	1.22716	1277.83	11.7517	1276.39	14.2102	1280.22	20.4895	1280.22	20.4895
IPq	209.704	209.704	1.79414	2.56518	1.03324	0.221582	0.734183	1290.77	7.54874	1290.23	8.58488	1291.65	14.1445	1291.65	14.1445
IPq	47.7884	47.7884	1.74911	2.53782	1.2471	0.218682	0.979391	1282.95	9.08383	1274.91	11.3291	1296.42	15.0112	1296.42	15.0112
IPq	139.036	139.036	2.04804	2.70536	1.18451	0.232656	0.880021	1329.93	8.78159	1348.4	10.7074	1300.28	15.4079	1300.28	15.4079
IPq	118.506	118.506	1.9409	2.5791	1.18381	0.220706	0.98223	1294.73	8.662	1285.6	11.4481	1309.86	12.8229	1309.86	12.8229
IPq	113.242	113.242	2.25994	2.67383	1.20279	0.228175	0.998894	1321.25	8.88882	1324.93	11.9632	1315.28	12.9927	1315.28	12.9927
IPq	102.874	102.874	2.55839	2.73478	1.13543	0.232493	0.927054	1337.96	8.44225	1347.55	11.2732	1322.63	12.6993	1322.63	12.6993
IPq	110.847	110.847	2.27458	2.68351	1.28515	0.227303	1.09926	1323.92	9.5069	1320.35	13.1242	1329.7	12.8847	1329.7	12.8847
IPq	64.2746	64.2746	1.87087	2.69553	1.29011	0.227971	1.07927	1327.23	9.55512	1323.86	12.9164	1332.66	13.6729	1332.66	13.6729
IPq	76.2577	76.2577	1.62917	2.62358	1.66371	0.221007	1.3741	1307.27	12.2317	1287.19	16.0334	1340.34	18.1256	1340.34	18.1256
IPq	77.6497	77.6497	2.25495	2.82821	1.08343	0.237284	0.860169	1363.05	8.12751	1372.56	10.6341	1348.15	12.7155	1348.15	12.7155
IPq	100.587	100.587	1.84684	2.79685	1.17429	0.233836	0.970464	1354.7	8.78342	1354.57	11.8564	1354.88	12.7511	1354.88	12.7511
IPq	47.5182	47.5182	2.19802	2.86241	1.30625	0.236708	1.11608	1372.08	9.8298	1369.56	13.7708	1375.99	13.0503	1375.99	13.0503
IPq	21.4306	21.4306	3.89525	2.82948	1.40636	0.233582	1.0673	1363.38	10.5513	1353.25	13.028	1379.3	17.6009	1379.3	17.6009
IPq	106.439	106.439	2.01321	3.02261	1.62202	0.248641	1.21838	1413.34	12.376	1431.46	15.64	1386.12	20.5597	1386.12	20.5597
IPq	139.052	139.052	2.03063	2.81444	1.55394	0.230781	1.27654	1359.39	11.6425	1338.59	15.4302	1392.23	17.0001	1392.23	17.0001
IPq	45.6252	45.6252	1.31878	2.86327	1.51594	0.233733	1.34231	1372.31	11.4088	1354.03	16.3934	1400.84	13.4996	1400.84	13.4996
IPq	177.836	177.836	2.81651	2.62852	1.44708	0.212625	1.19185	1308.65	10.6444	1242.79	13.4719	1418.26	15.6892	1418.26	15.6892
IPq	116.173	116.173	1.28214	3.06365	1.21207	0.247622	0.892286	1423.65	9.27884	1426.2	11.4164	1419.82	15.6792	1419.82	15.6792
IPq	184.501	184.501	2.57061	3.08941	1.25097	0.249637	1.06564	1430.07	9.59632	1436.61	13.7232	1420.33	12.5226	1420.33	12.5226
IPq	101.739	101.739	4.15371	3.12083	1.45051	0.246638	1.2328	1437.84	11.1546	1421.11	15.7228	1462.65	14.5243	1462.65	14.5243
IPq	58.3875	58.3875	1.16441	3.18	1.30083	0.251156	1.08622	1452.31	10.0489	1444.43	14.0562	1463.85	13.5991	1463.85	13.5991
IPq	39.7514	39.7514	1.30255	2.97063	1.7616	0.233689	1.35141	1400.14	13.383	1353.81	16.5021	1471.39	21.4487	1471.39	21.4487
IPq	62.0175	62.0175	1.45257	3.19177	1.22592	0.250959	0.960417	1455.17	9.47846	1443.42	12.4205	1472.35	14.4592	1472.35	14.4592
IPq	98.6443	98.6443	1.4232	2.97603	1.44576	0.233904	1.17504	1401.52	10.9883	1354.93	14.3591	1473.09	15.9842	1473.09	15.9842
IPq	548.914	548.914	1.36627	3.40996	1.3875	0.267597	1.18482	1506.69	10.8942	1528.59	16.124	1476.02	13.6964	1476.02	13.6964
IPq	130.729	130.729	2.46267	3.32369	1.08813	0.259678	0.854787	1486.63	8.4935	1488.19	11.3593	1484.39	12.7578	1484.39	12.7578
IPq	60.9601	60.9601	2.6472	2.95618	1.6188	0.230465	1.28369	1396.44	12.2829	1336.94	15.4994	1488.49	18.6765	1488.49	18.6765
IPq	95.5959	95.5959	2.17461	3.3287	1.19168	0.258086	1.04233	1487.81	9.30505	1480.04	13.7841	1498.88	10.9233	1498.88	10.9233
IPq	230.794	230.794	5.2259	3.19383	1.52726	0.247232	1.28777	1455.67	11.8103	1424.18	16.4556	1501.91	15.521	1501.91	15.521
IPq	120.999	120.999	1.20935	3.24751	1.3931	0.251224	1.07324	1468.58	10.8154	1444.79	13.8913	1503.14	16.7869	1503.14	16.7869
IPq	166.943	166.943	1.50935	3.33448	1.10575	0.257771	0.95639	1489.16	8.63753	1478.43	12.6353	1504.46	10.4873	1504.46	10.4873
IPq	262.242	262.242	1.83164	3.3749	1.33806	0.260763	1.08647	1498.59	10.4813	1493.74	14.486	1505.43	14.7568	1505.43	14.7568
IPq	35.6957	35.6957	2.05294	3.29636	1.40834	0.253905	1.05824	1480.19	10.9721	1458.58	13.8136	1511.29	17.5429	1511.29	17.5429
IPq	162.807	162.807	1.58775	3.40138	1.32975	0.256547	1.16668	1504.72	10.4347	1472.15	15.3553	1550.85	11.983	1550.85	11.983
IPq	140.87	140.87	2.98573	3.6616	1.40451	0.275799	1.17417	1563.04	11.2023	1570.17	16.3629	1553.4	14.4698	1553.4	14.4698
IPq	46.6046	46.6046	2.17121	3.58893	1.59894	0.26972	1.31974	1547.09	12.6981	1539.38	18.0723	1557.61	16.9392	1557.61	16.9392
IPq	26.5216	26.5216	1.48594	3.77105	1.63821	0.282707	1.30355	1586.6	13.1484	1604.98	18.5206	1562.24	18.6058	1562.24	18.6058
IPq	51.5472	51.5472	2.22413	3.34275	1.86756	0.248263	1.6113	1491.1	14.5973	1429.51	20.6586	1579.79	17.6643	1579.79	17.6643
IPq	27.0207	27.0207	0.692472	3.6708	1.2594	0.271839	0.839748	1565.04	10.0502	1550.13	11.5704	1585.19	17.5468	1585.19	17.5468
IPq	179.527	179.527	3.99909	3.80996	1.33669	0.280262	1.14501	1594.85	10.7511	1592.68	16.1582	1597.7	12.8742	1597.7	12.8742
IPq	316.93	316.93	3.23935	3.65494	1.53118	0.268796	1.23485	1561.59	12.208	1534.69	16.8642	1598.13	16.8988	1598.13	16.8988
IPq	63.8116	63.8116	3.22743	3.85583	1.37786	0.283503	1.16531	1604.49	11.1098	1608.98	16.5929	1598.58	13.7221	1598.58	13.7221
IPq	87.5332	87.5332	2.25096	3.81357	1.36998	0.280079	1.07427	1595.61	11.0211	1591.76	15.1522	1600.69	15.8636	1600.69	15.8636
IPq	81.6921	81.6921	2.05167	3.76246	1.27688	0.27605	1.03527	1584.77	10.2432	1571.44	14.4376	1602.55	13.9426	1602.55	13.9426
IPq	92.5993	92.5993	1.81992	3.74265	1.35844	0.273685	0.938725	1580.54	10.8854	1559.48	13.0031	1608.75	18.301	1608.75	18.301
IPq	128.473	128.473	1.84847	3.55851	1.45766	0.259787	1.31345	1540.33	11.5545	1488.75	17.4604	1611.85	11.7769	1611.85	11.7769
IPq	62.6117	62.6117	2.22211	4.01802	1.37923	0.292097	1.08966	1637.85	11.2141	1652	15.8797	1619.71	15.7365	1619.71	15.7365
IPq	25.4879	25.4879	1.18772	3.92887	1.63554	0.28533	1.27721	1619.65	13.2384	1618.15	18.2774	1621.57	19.01	1621.57	19.01
IPq	81.2019	81.2019	1.37283	3.9992	1.27369	0.289469	1.09212	1634.03	10.3462	1638.88	15.8045	1627.79	12.185	1627.79	12.185
IPq	59.9259	59.9259	2.21004	3.94545	1.54348	0.285068	1.28465	1623.06	12.5038	1616.84	18.3707	1631.12	15.9001	1631.12	15.9001
IPq	116.999	116.999	1.13176	3.74365	1.36385	0.270435	1.06316	1580.76	10.9294	1543.01	14.589	1631.48	15.8752	1631.48	15.8752
IPq	110.071	110.071	1.36255	3.81446	1.66044	0.275501	1.44245	1595.8	13.3587	1568.66	20.0846	1631.81	15.2828	1631.81	15.2828
IPq	61.2561	61.2561	0.783819	3.97681	1.28505	0.287226	1.02327	1629.48	10.4267	1627.65	14.7191	1631.81	14.4447	1631.81	14.4447
IPq	173.358	173.358	2.33885	3.89786	1.10493	0.281486	0.850453	1613.24	8.9289	1598.84	12.0424	1632.07	13.1076	1632.07	13.1076
IPq	189.839	189.839	1.13359	3.82398	1.21671	0.275294	0.95326	1597.81	9.79356	1567.62	13.2653	1637.84	14.0406	1637.84	14.0406
IPq	72.3469	72.3469	1.56486	3.87677	1.65479	0.278744	1.29776	1608.86	13.3578	1585.03	18.2362	1640.17	19.0589	1640.17	19.0589
IPq	263.247	263.247	1.35169	4.10787	1.40457	0.295274	1.01811	1655.87	11.4701	1667.83	14.9616	1640.71	17.9619	1640.71	17.9619
IPq	53.3029	53.3029	1.36081	4.00873	1.63615	0.288025	1.37131	1635.97	13.2971	1631.65	19.7679	1641.5	16.5653	1641.5	16.5653
IPq	214.747	214.747	1.46343	3.98933	1.49803	0.286369	1.26577	1632.03	12.1627	1623.36	18.165	1643.2	14.8678	1643.2	14.8678
IPq	162.527	162.527	8.40648	3.75988	1.41188	0.269275	1.17851	1584.22	11.3246	1537.12	16.1173	1647.48	14.4205	1647.48	14.4205
IPq	88.9719	88.9719	0.782346	3.95463	1.69088	0.282256	1.39872	1624.94	13.7045	1602.71	19.848	1653.83	17.6054	1653.83	17.6054
IPq	111.101	111.101	4.3698	3.9346	1.12828	0.280663	0.922029	1620.83	9.13498	1594.7	13.0261	1654.9	12.0477	1654.9	12.0477
IPq	73.4332	73.4332	0.956355	3.20875	1.64708	0.228867	1.25088	1459.27	12.7512	1328.56	15.018	1655.07	19.853	1655.07	19.853
IPq	141.485	141.485	1.94768	3.32805	1.23709	0.237089	0.9048	1487.65	9.65923	1371.55	11.1785	1657.3	15.6257	1657.3	15.6257
IPq	53.6046	53.6046	1.63018	3.995	1.56247	0.282805	1.1976	1633.18	12.6896	1605.47	17.0199	1669.03	18.5598	1669.03	18.5598
IPq	96.4498	96.4498	1.82561	4.06778	1.50684	0.28758	1.28183	1647.87	12.2817	1629.42	18.4559	1671.45	14.645	1671.45	14.645
IPq	144.385	144.385	4.07131	3.29788	1.55625	0.232226	1.34133	1480.55	12.1258	1346.16	16.2958	1678.79	14.578	1678.79	14.578
IPq	423.801	423.801	3.89187	3.83007	1.18307	0.268779	0.979176	1599.09	9.5259	1534.6	13.3718	1685.12	12.2557	1685.12	12.2557
IPq	67.8054	67.8054	1.39828	4.19734	1.81697	0.294382	1.47272	1673.5	14.9006	1663.39	21.5918	1686.19	19.6387	1686.19	19.6387
IPq	87.4902	87.4902	3.40194	4.3941	1.46291	0.305069	1.2351	1711.23	12.1009	1716.4	18.6116	1704.9	14.4331	1704.9	14.4331
IPq	110.56	110.56	2.54484	4.11807	1.25953	0.285209	1.07531	1657.89	10.2906	1617.54	15.3831	1709.38	12.0666	1709.38	12.0666
IPq	100.711	100.711	2.7181	3.8977	3.3807	0.269767	2.96747	1613.21	27.3248	1539.62	40.6419	1710.61	29.7993	1710.61	29.7993
IPq	20.0918	20.0918	4.57273	4.56083	1.36824	0.314702	0.967828	1742.14	11.395	1763.8	14.9345	1716.22	17.7802	1716.22	17.7802
IPq	49.4889	49.4889	3.93462	4.30301	1.42446	0.296828	1.17889	1693.94	11.7368	1675.56	17.3946	1716.74	14.6981	1716.74	14.6981
IPq	80.4271	80.4271	1.12068	4.41836	1.54777	0.303195	1.32894	1715.79	12.816	1707.13	19.9313	1726.35	14.5692	1726.35	14.5692
IPq	55.1923	55.1923	1.62998	4.32165	1.65263	0.29636	1.27392	1697.5	13.6281	1673.23	18.7739	1727.58	19.3269	1727.58	19.3269
IPq	119.514	119.514	1.8502	4.37417	1.46151	0.299531	1.32348	1707.47	12.0791	1688.98	19.665	1730.22	11.3791	1730.22	11.3791
IPq	290.125	290.125	1.50022	4.20112	2.15235	0.287309	2.03406	1674.24	17.6545	1628.07	29.2653	1732.59	12.9098	1732.59	12.9098
IPq	166.003	166.003	1.652	4.39465	1.50804	0.300045	1.30105	1711.33	12.4746	1691.53	19.3572	1735.64	13.9839	1735.64	13.9839
IPq	178.76	178.76	1.37877	4.47995	1.45857	0.305855	1.31416	1727.26	12.108	1720.28	19.8421	1735.72	11.6038	1735.72	11.6038
IPq	221.113	221.113	2.51599	4.44306	1.24995	0.302929	0.998222	1720.41	10.3604	1705.82	14.9612	1738.19	13.7915	1738.19	13.7915
IPq	138.49	138.49	2.7852	4.61188	1.36163	0.31353	1.09773	1751.42	11.3626	1758.05	16.891	1743.49	14.7597	1743.49	14.7597
IPq	188.016	188.016	2.53858	4.40308	1.34504	0.299127	1.07588	1712.92	11.1301	1686.98	15.9694	1744.77	14.7868	1744.77	14.7868
IPq	182.994	182.994	2.36172	4.62021	1.47792	0.312495	1.31343	1752.93	12.337	1752.97	20.1592	1752.85	12.3994	1752.85	12.3994
IPq	232.634	232.634	5.77241	4.86486	1.38742	0.328287	1.1736	1796.19	11.6861	1830.07	18.6982	1757.06	13.5362	1757.06	13.5362
IPq	106.086	106.086	2.55733	4.32771	1.256	0.290661	1.0445	1698.66	10.3598	1644.83	15.1637	1765.7	12.7455	1765.7	12.7455
IPq	119.185	119.185	4.25118	4.62762	1.34942	0.310627	1.11533	1754.26	11.2675	1743.79	17.0405	1766.75	13.8761	1766.75	13.8761
IPq	109.343	109.343	2.05734	4.62783	1.37116	0.309253	1.11177	1754.3	11.4491	1737.03	16.9287	1774.93	14.6457	1774.93	14.6457
IPq	340.272	340.272	1.79249	4.81941	1.61519	0.320388	1.42659	1788.29	13.583	1791.63	22.3149	1784.39	13.8061	1784.39	13.8061
IPq	377.638	377.638	2.83392	4.69108	1.3982	0.311143	1.13553	1765.65	11.7029	1746.33	17.3711	1788.57	14.8627	1788.57	14.8627
IPq	83.3373	83.3373	2.87263	4.90255	1.20302	0.32369	0.930806	1802.7	10.1461	1807.73	14.6731	1796.87	13.8728	1796.87	13.8728
IPq	146.085	146.085	1.37372	4.87883	1.44748	0.321858	1.18935	1798.61	12.198	1798.8	18.6685	1798.37	15.0145	1798.37	15.0145
IPq	154.147	154.147	1.70443	4.69635	1.43397	0.309577	1.18265	1766.59	12.0048	1738.62	18.0224	1799.8	14.7556	1799.8	14.7556
IPq	386.273	386.273	2.42476	4.76147	1.733	0.311347	1.54325	1778.13	14.5434	1747.33	23.6201	1814.47	14.319	1814.47	14.319
IPq	59.6426	59.6426	1.24284	5.00087	1.42526	0.326417	1.02939	1819.47	12.0608	1820.99	16.3302	1817.71	17.8955	1817.71	17.8955
IPq	129.81	129.81	3.09019	5.13045	1.37667	0.332704	1.16253	1841.16	11.6988	1851.47	18.7089	1829.51	13.3668	1829.51	13.3668
IPq	281.564	281.564	14.8646	4.46642	1.34748	0.288758	1.14727	1724.75	11.1796	1635.32	16.5709	1835.05	12.8043	1835.05	12.8043
IPq	124.605	124.605	3.66777	4.93261	1.22632	0.318769	0.968371	1807.85	10.3533	1783.71	15.0892	1835.79	13.6305	1835.79	13.6305
IPq	65.9728	65.9728	2.01042	4.63874	1.74411	0.299543	1.49332	1756.27	14.5697	1689.04	22.1892	1837.2	16.3207	1837.2	16.3207
IPq	140.913	140.913	1.23782	5.0389	1.26061	0.325361	1.05424	1825.88	10.6808	1815.86	16.6836	1837.32	12.5188	1837.32	12.5188
IPq	168.334	168.334	2.47282	5.04945	1.31982	0.324898	1.07964	1827.66	11.1864	1813.61	17.0673	1843.69	13.7375	1843.69	13.7375
IPq	213.777	213.777	4.62443	4.12354	1.64964	0.262495	1.44502	1658.98	13.4817	1502.59	19.368	1863.05	14.3666	1863.05	14.3666
IPq	116.152	116.152	1.0244	4.98367	1.19235	0.316396	0.871252	1816.56	10.0839	1772.1	13.4992	1867.91	14.6875	1867.91	14.6875
IPq	45.4263	45.4263	0.737518	5.32266	1.42076	0.336224	1.12563	1872.51	12.145	1868.48	18.2586	1876.97	15.6246	1876.97	15.6246
IPq	148.118	148.118	2.83338	5.18312	1.55775	0.325768	1.38503	1849.85	13.2598	1817.84	21.9392	1886.02	12.8354	1886.02	12.8354
IPq	57.6961	57.6961	1.17511	5.42278	1.46796	0.339248	1.18077	1888.46	12.5853	1883.05	19.2815	1894.4	15.6871	1894.4	15.6871
IPq	357.912	357.912	3.30956	5.43574	1.51967	0.338952	1.33945	1890.51	13.0336	1881.63	21.8585	1900.26	12.9016	1900.26	12.9016
IPq	232.52	232.52	3.70493	5.04091	1.29644	0.313808	1.02147	1826.22	10.9851	1759.42	15.7282	1903.26	14.3438	1903.26	14.3438
IPq	13.8959	13.8959	1.39663	5.3517	1.64437	0.330818	1.38983	1877.16	14.0689	1842.34	22.2717	1915.9	15.7662	1915.9	15.7662
IPq	46.8601	46.8601	1.7909	5.51424	1.36225	0.340391	1.09443	1902.82	11.7092	1888.55	17.9165	1918.39	14.5476	1918.39	14.5476
IPq	157.447	157.447	1.20238	5.48647	0.977931	0.338478	0.76071	1898.48	8.3991	1879.34	12.401	1919.45	11.0197	1919.45	11.0197
IPq	255.944	255.944	8.09834	5.15655	1.40505	0.317738	1.23704	1845.48	11.9498	1778.67	19.2284	1921.63	11.9438	1921.63	11.9438
IPq	67.5513	67.5513	0.943182	5.66117	1.49291	0.346987	1.27637	1925.47	12.8837	1920.2	21.1957	1931.13	13.8669	1931.13	13.8669
IPq	420.37	420.37	2.65252	5.27198	1.71841	0.322315	1.51444	1864.34	14.6675	1801.02	23.7968	1935.66	14.5337	1935.66	14.5337
IPq	30.4189	30.4189	2.86475	5.71945	1.4923	0.348198	1.0808	1934.31	12.8982	1925.99	17.9943	1943.23	18.4013	1943.23	18.4013
IPq	46.5563	46.5563	1.16288	5.79242	1.31152	0.349374	0.965376	1945.28	11.3569	1931.61	16.1129	1959.85	15.8444	1959.85	15.8444
IPq	118.76	118.76	1.56035	5.67944	1.32178	0.34239	1.09441	1928.25	11.4123	1898.16	17.9945	1960.73	13.2268	1960.73	13.2268
IPq	44.323	44.323	1.54648	5.89266	1.20529	0.354723	0.964982	1960.15	10.4632	1957.11	16.2883	1963.35	12.8832	1963.35	12.8832
IPq	470.129	470.129	5.79539	5.78586	1.29071	0.347106	1.15587	1944.3	11.1748	1920.77	19.1994	1969.44	10.2389	1969.44	10.2389
IPq	214.199	214.199	2.15675	6.01341	1.19078	0.360634	0.881838	1977.79	10.3673	1985.18	15.0672	1970.05	14.264	1970.05	14.264
IPq	77.0632	77.0632	2.84764	5.83165	1.00375	0.348507	0.767195	1951.13	8.7003	1927.46	12.7815	1976.31	11.5309	1976.31	11.5309
IPq	181.81	181.81	2.40942	5.94466	1.30454	0.354866	1.11835	1967.79	11.3392	1957.79	18.8828	1978.29	11.963	1978.29	11.963
IPq	264.236	264.236	1.98529	5.85518	1.41503	0.348102	1.21046	1954.62	12.2727	1925.53	20.149	1985.55	13.0422	1985.55	13.0422
IPq	266.022	266.022	1.29622	6.11829	1.38386	0.362746	1.08171	1992.86	12.0781	1995.18	18.5617	1990.44	15.3493	1990.44	15.3493
IPq	82.3087	82.3087	2.14325	5.83586	1.30533	0.345367	1.03751	1951.75	11.3156	1912.44	17.1693	1993.71	14.0811	1993.71	14.0811
IPq	404.789	404.789	1.43169	5.85015	1.32558	0.345566	1.07939	1953.87	11.4953	1913.39	17.8699	1997.03	13.6732	1997.03	13.6732
IPq	20.618	20.618	1.03789	6.5318	1.84797	0.365387	1.4863	2050.19	16.2741	2007.66	25.6404	2093.23	19.301	2093.23	19.301
IPq	20.8052	20.8052	1.12794	6.47965	1.66717	0.361135	1.33461	2043.14	14.666	1987.55	22.8266	2099.72	17.548	2099.72	17.548
IPq	11.4142	11.4142	1.23191	7.00985	1.70817	0.389731	1.25014	2112.68	15.1802	2121.58	22.6002	2104.01	20.4348	2104.01	20.4348
IPq	142.693	142.693	1.70893	8.24817	1.46929	0.394166	1.18997	2258.64	13.3065	2142.12	21.688	2365.91	14.7089	2365.91	14.7089
IPq	230.455	230.455	1.18151	11.0569	1.32355	0.482095	1.05181	2527.94	12.325	2536.38	22.0553	2521.15	13.4948	2521.15	13.4948
IPq	32.2227	32.2227	1.5055	10.8604	1.3374	0.471241	1.08167	2511.25	12.4354	2489	22.3344	2529.28	13.2034	2529.28	13.2034
IPq	159.633	159.633	2.34642	10.9185	1.07013	0.468163	0.889059	2516.21	9.95452	2475.5	18.2757	2549.21	9.97554	2549.21	9.97554
IPq	46.5611	46.5611	2.23146	11.1403	1.32169	0.463701	1.1035	2534.94	12.3154	2455.88	22.536	2598.82	12.1254	2598.82	12.1254
IPq	63.864	63.864	1.48465	11.7962	1.44543	0.479601	1.17456	2588.36	13.5305	2525.53	24.5433	2637.91	13.9901	2637.91	13.9901
IPq	59.4266	59.4266	1.01958	12.6428	1.30561	0.509396	0.977236	2653.41	12.2858	2654.05	21.2604	2652.91	14.3582	2652.91	14.3582
IPq	46.453	46.453	1.52229	12.3912	1.27126	0.498431	1.10985	2634.51	11.9448	2607.05	23.7988	2655.67	10.2805	2655.67	10.2805
IPq	34.7213	34.7213	1.33808	12.959	1.48495	0.517247	1.23807	2676.68	13.9986	2687.5	27.2087	2668.5	13.5797	2668.5	13.5797
IPq	174.332	174.332	0.886468	12.7636	1.12164	0.509199	0.882291	2662.36	10.5619	2653.21	19.1899	2669.31	11.4696	2669.31	11.4696
IPq	37.1183	37.1183	1.80555	12.2076	1.49763	0.486189	1.15108	2620.5	14.0562	2554.17	24.2749	2672.14	15.8594	2672.14	15.8594
IPq	64.4278	64.4278	0.832627	12.642	1.21148	0.498676	0.990214	2653.35	11.3999	2608.1	21.2403	2688.01	11.5356	2688.01	11.5356
IPq	217.786	217.786	4.42081	11.7147	1.58169	0.46184	1.34676	2581.88	14.7982	2447.68	27.4284	2688.94	13.7082	2688.94	13.7082
IPq	183.041	183.041	5.64446	12.8915	1.31634	0.507146	1.0226	2671.76	12.4044	2644.43	22.1821	2692.48	13.6943	2692.48	13.6943
IPq	81.4404	81.4404	1.00008	13.1524	1.33316	0.514587	1.04296	2690.64	12.5808	2676.18	22.8428	2701.51	13.7078	2701.51	13.7078
IPq	19.3767	19.3767	2.10607	13.322	1.58422	0.520273	1.31974	2702.74	14.9638	2700.34	29.1151	2704.53	14.4663	2704.53	14.4663
IPq	97.6648	97.6648	4.06107	12.4411	1.28739	0.485533	1.1039	2638.28	12.1	2551.32	23.2587	2705.67	10.9329	2705.67	10.9329
IPq	147.25	147.25	1.47518	12.9521	1.48807	0.503653	1.24551	2676.18	14.0275	2629.48	26.8937	2711.64	13.4322	2711.64	13.4322
IPq	91.0571	91.0571	4.81358	13.3294	1.33424	0.517829	1.17483	2703.27	12.6028	2689.97	25.838	2713.22	10.4307	2713.22	10.4307
IPq	28.9165	28.9165	2.88104	12.9874	1.61061	0.503789	1.24525	2678.74	15.1858	2630.06	26.893	2715.68	16.8438	2715.68	16.8438
IPq	66.4138	66.4138	0.966156	13.4247	1.62872	0.516704	1.34518	2710	15.3925	2685.18	29.5422	2728.55	15.1204	2728.55	15.1204
IPq	19.1314	19.1314	0.234462	13.9787	1.26978	0.537932	1.08265	2748.27	12.0329	2774.79	24.4117	2728.83	10.9236	2728.83	10.9236
IPq	42.6424	42.6424	6.42133	13.951	1.12118	0.534213	0.885091	2746.39	10.6233	2759.18	19.8672	2736.98	11.3228	2736.98	11.3228
IPq	104.261	104.261	1.15388	11.2153	1.39307	0.421662	1.15316	2541.19	12.9877	2268.02	22.0484	2767.08	12.8266	2767.08	12.8266
IPq	165.735	165.735	5.68733	14.6812	1.28563	0.54389	1.03808	2794.8	12.2222	2799.71	23.5747	2791.25	12.4163	2791.25	12.4163
IPq	163.951	163.951	0.986293	14.71	1.00743	0.541934	0.755985	2796.66	9.57843	2791.54	17.1283	2800.35	10.8951	2800.35	10.8951
IPq	32.8442	32.8442	1.4596	16.708	1.25664	0.573227	1.03719	2918.23	12.0397	2921.06	24.3621	2916.27	11.4894	2916.27	11.4894
IPq	54.914	54.914	2.39658	16.9891	1.17477	0.567452	0.990921	2934.22	11.2658	2897.35	23.1256	2959.59	10.1799	2959.59	10.1799
IPq	28.5617	28.5617	1.64172	15.7353	1.48267	0.509554	1.1021	2860.86	14.1562	2654.73	23.9818	3009.42	15.9336	3009.42	15.9336
IPMa	-Spot 217	250.889	1.74612	0.410785	1.59057	0.0573688	0.985649	349.441	4.70261	359.604	3.44739	282.454	28.5696	359.604	3.44739
IPMa	-Spot 37	1029.93	3.18934	0.445069	1.63118	0.0584534	1.36592	373.82	5.10121	366.213	4.86274	421.22	19.904	366.213	4.86274
IPMa	-Spot 268	542.776	1.79896	0.473667	1.85287	0.0612816	1.57564	393.719	6.0472	383.415	5.86508	454.692	21.6534	383.415	5.86508
IPMa	-Spot 193	206.087	2.09395	0.48042	1.53938	0.0643854	0.99153	398.361	5.07243	402.24	3.86645	375.891	26.484	402.24	3.86645
IPMa	-Spot 277	445.694	0.975942	0.509785	1.84768	0.0665622	1.55859	418.305	6.33481	415.41	6.27033	434.276	22.1022	415.41	6.27033
IPMa	-Spot 219	133.062	2.24767	0.498571	1.79502	0.0676656	1.26742	410.735	6.06393	422.076	5.17813	347.459	28.7465	422.076	5.17813
IPMa	-Spot 258	124.986	1.64088	0.521048	1.89418	0.0680633	1.33371	425.851	6.58858	424.477	5.47894	433.274	29.964	424.477	5.47894
IPMa	-Spot 261	623.253	0.630627	0.519707	1.93689	0.0682631	1.63303	424.956	6.72575	425.683	6.72696	420.991	23.2522	425.683	6.72696
IPMa	-Spot 19	60.1307	2.64923	0.465694	2.18994	0.0688672	1.31906	388.21	7.06523	429.327	5.47861	149.941	40.9843	429.327	5.47861
IPMa	-Spot 58	518.071	6.67646	0.525325	1.5606	0.0688798	1.39672	428.702	5.45747	429.403	5.80216	424.915	15.5302	429.403	5.80216
IPMa	-Spot 230	332.561	1.54336	0.520451	1.80434	0.068935	1.22902	425.452	6.27135	429.736	5.10935	402.287	29.5892	429.736	5.10935
IPMa	-Spot 186	236.569	1.42224	0.524379	1.64215	0.0689697	1.1766	428.072	5.73588	429.946	4.89374	417.979	25.5876	429.946	4.89374
IPMa	-Spot 283	186.739	2.2181	0.525458	1.80288	0.0692707	1.37103	428.791	6.30582	431.76	5.72567	412.843	26.1738	431.76	5.72567
IPMa	-Spot 33	205.439	1.11529	0.52801	1.75555	0.0695286	1.36514	430.488	6.15977	433.315	5.72092	415.367	24.666	433.315	5.72092
IPMa	-Spot 86	1028.24	118.754	0.532262	1.33725	0.0695714	1.12517	433.309	4.7167	433.573	4.71798	431.888	16.1021	433.573	4.71798
IPMa	-Spot 264	205.953	1.34297	0.537589	1.48797	0.069719	1.2076	436.834	5.28249	434.463	5.07368	449.329	19.3325	434.463	5.07368
IPMa	-Spot 200	183.794	1.53167	0.514584	1.73851	0.0698123	1.37283	421.527	5.99755	435.025	5.7751	348.361	24.1184	435.025	5.7751
IPMa	-Spot 5	89.4372	1.39145	0.521936	1.95715	0.0703609	1.23978	426.444	6.81526	438.329	5.25367	362.679	34.1489	438.329	5.25367
IPMa	-Spot 246	354.063	1.73182	0.537629	1.60553	0.0710216	1.1859	436.86	5.70012	442.308	5.06944	408.228	24.216	442.308	5.06944
IPMa	-Spot 185	51.5186	1.51912	0.47467	2.17927	0.0711815	1.36963	394.409	7.12272	443.27	5.86714	117.097	39.9817	443.27	5.86714
IPMa	-Spot 194	207.51	6.8383	0.544445	1.30956	0.0717414	1.0014	441.351	4.68747	446.639	4.3212	413.849	18.8626	446.639	4.3212
IPMa	-Spot 212	322.376	26.7177	0.571913	1.55725	0.0724691	1.10978	459.251	5.75299	451.014	4.83421	500.692	24.0545	451.014	4.83421
IPMa	-Spot 82	529.983	1.03841	0.559606	1.58488	0.0731619	1.39445	451.27	5.77428	455.177	6.1283	431.389	16.7853	455.177	6.1283
IPMa	-Spot 20	471.856	2.73858	0.574615	1.90198	0.0734701	1.65872	460.995	7.04766	457.028	7.31835	480.791	20.5747	457.028	7.31835
IPMa	-Spot 144	286.9	1.80605	0.579526	1.30794	0.0748954	1.11824	464.157	4.87268	465.582	5.02276	457.112	15.0668	465.582	5.02276
IPMa	-Spot 17	219.767	1.21179	0.600837	1.58505	0.0756616	1.18337	477.765	6.04071	470.175	5.36584	514.342	23.162	470.175	5.36584
IPMa	-Spot 104	89.1162	2.29746	0.600363	1.85367	0.078373	1.09944	477.464	7.06097	486.404	5.15097	434.724	33.2538	486.404	5.15097
IPMa	-Spot 192	549.283	9.41505	1.12299	1.67038	0.109358	1.44058	764.408	8.97191	669.017	9.15452	1054.46	17.0493	669.017	9.15452
IPMa	-Spot 179	656.023	5.02522	1.26855	1.47993	0.135397	1.24688	831.743	8.40312	818.581	9.5853	867.074	16.5169	818.581	9.5853
IPMa	-Spot 243	288.218	1.89402	1.50903	1.47962	0.15645	1.11661	934.048	9.03617	937.017	9.73793	927.031	19.9577	927.031	19.9577
IPMa	-Spot 85	752.054	10.7357	1.52762	1.36672	0.156002	1.22502	941.542	8.38732	934.52	10.6569	958.023	12.3878	958.023	12.3878
IPMa	-Spot 51	481.534	2.08476	1.48239	1.62391	0.151049	1.3755	923.207	9.84684	906.843	11.636	962.528	17.6372	962.528	17.6372
IPMa	-Spot 315	234.432	17.1925	1.60549	1.40187	0.163413	1.03765	972.351	8.77136	975.718	9.39553	964.735	19.2523	964.735	19.2523
IPMa	-Spot 285	124.567	2.09666	1.58785	1.64162	0.161382	1.35122	965.454	10.2279	964.451	12.1038	967.735	19.0186	967.735	19.0186
IPMa	-Spot 31	149.048	2.19847	1.55634	1.18409	0.158006	0.849805	953.016	7.31998	945.686	7.47482	969.958	16.8308	969.958	16.8308
IPMa	-Spot 224	478.986	150.325	1.65515	1.41514	0.167692	1.15048	991.524	8.95755	999.382	10.6508	974.197	16.8111	974.197	16.8111
IPMa	-Spot 79	557.634	8.98757	1.56239	1.56591	0.157699	1.34379	955.414	9.69513	943.977	11.8	981.843	16.3718	981.843	16.3718
IPMa	-Spot 164	193.034	3.10572	1.51132	1.48444	0.15227	1.20907	934.973	9.07104	913.678	10.2999	985.489	17.522	985.489	17.522
IPMa	-Spot 174	42.7515	0.814372	1.5871	1.90506	0.159886	1.19092	965.16	11.8672	956.142	10.5827	985.767	30.2642	985.767	30.2642
IPMa	-Spot 245	79.3897	2.85977	1.6961	1.694	0.170601	1.24042	1007.06	10.8212	1015.42	11.6536	988.94	23.4701	988.94	23.4701
IPMa	-Spot 265	409.436	1.70399	1.5522	1.42065	0.155996	1.17738	951.371	8.77327	934.488	10.2422	990.636	16.1579	990.636	16.1579
IPMa	-Spot 233	74.6596	3.58919	1.70382	1.24071	0.17118	0.865612	1009.97	7.93879	1018.61	8.15586	991.254	18.0587	991.254	18.0587
IPMa	-Spot 92	201.577	0.719473	1.70505	1.67931	0.170959	1.37669	1010.43	10.7483	1017.39	12.957	995.338	19.5351	995.338	19.5351
IPMa	-Spot 235	159.164	2.84423	1.75987	1.45951	0.176299	1.19245	1030.8	9.45017	1046.73	11.5211	997.137	17.0791	997.137	17.0791
IPMa	-Spot 63	82.3862	3.90965	1.7256	1.48112	0.172716	1.14178	1018.11	9.52166	1027.06	10.8403	998.909	19.1444	998.909	19.1444
IPMa	-Spot 128	81.2541	3.60439	1.68812	1.67753	0.168951	1.28512	1004.05	10.6972	1006.33	11.9737	999.075	21.9006	999.075	21.9006
IPMa	-Spot 169	398.66	2.5166	1.74752	1.72799	0.174579	1.40655	1026.25	11.1601	1037.29	13.4767	1002.75	20.3738	1002.75	20.3738
IPMa	-Spot 216	100.702	2.59053	1.71616	1.554	0.171092	1.30355	1014.59	9.97003	1018.12	12.2768	1006.95	17.1489	1006.95	17.1489
IPMa	-Spot 91	61.4264	0.970957	1.69652	1.73162	0.168924	1.32984	1007.22	11.0626	1006.18	12.3886	1009.47	22.4849	1009.47	22.4849
IPMa	-Spot 95	208.465	3.50977	1.7126	1.31703	0.170451	1.09275	1013.26	8.44321	1014.6	10.2586	1010.35	14.9066	1010.35	14.9066
IPMa	-Spot 260	88.5034	1.59647	1.79083	1.83074	0.177653	1.58832	1042.13	11.9289	1054.14	15.4459	1017	18.4426	1017	18.4426
IPMa	-Spot 305	309.267	4.02392	1.7849	1.84548	0.176848	1.50595	1039.97	12.0106	1049.73	14.5884	1019.49	21.5992	1019.49	21.5992
IPMa	-Spot 121	215.248	2.31041	1.77006	1.26505	0.175224	1.00979	1034.54	8.20818	1040.83	9.70563	1021.26	15.426	1021.26	15.426
IPMa	-Spot 269	228.704	15.4444	1.70288	1.33666	0.168523	1.10312	1009.61	8.55102	1003.97	10.2556	1021.87	15.2785	1021.87	15.2785
IPMa	-Spot 210	74.495	1.91362	1.67651	1.89651	0.165767	1.4574	999.659	12.0627	988.747	13.3593	1023.65	24.5774	1023.65	24.5774
IPMa	-Spot 109	173.693	15.9444	1.74091	1.76415	0.1717	1.5283	1023.8	11.378	1021.47	14.4371	1028.76	17.8366	1028.76	17.8366
IPMa	-Spot 69	802.466	4.32904	1.7412	1.88773	0.171577	1.69961	1023.91	12.1758	1020.8	16.0457	1030.55	16.6258	1030.55	16.6258
IPMa	-Spot 101	307.53	1.73846	1.7528	1.45438	0.172537	1.15712	1028.2	9.40327	1026.07	10.9762	1032.7	17.8236	1032.7	17.8236
IPMa	-Spot 1	910.337	8.15881	1.79236	1.32682	0.17634	1.10485	1042.69	8.64779	1046.95	10.6767	1033.74	14.8628	1033.74	14.8628
IPMa	-Spot 195	666.319	3.56041	1.77465	1.72729	0.174489	1.52158	1036.22	11.218	1036.8	14.5725	1034.99	16.5329	1034.99	16.5329
IPMa	-Spot 36	43.0361	1.68114	1.80938	1.81386	0.17784	1.2447	1048.85	11.8624	1055.16	12.1151	1035.72	26.6695	1035.72	26.6695
IPMa	-Spot 254	284.375	4.46145	1.77057	1.09259	0.173722	0.806005	1034.73	7.08985	1032.58	7.69032	1039.25	14.9106	1039.25	14.9106
IPMa	-Spot 206	105.166	2.01907	1.73671	1.61983	0.170336	1.13543	1022.24	10.4379	1013.96	10.6531	1039.99	23.3397	1039.99	23.3397
IPMa	-Spot 190	218.916	1.24748	1.84003	1.45372	0.180241	1.06514	1059.87	9.5637	1068.29	10.4859	1042.56	19.9824	1042.56	19.9824
IPMa	-Spot 213	21.184	1.1705	1.85426	2.18298	0.181508	1.38086	1064.94	14.4008	1075.21	13.675	1043.99	34.1299	1043.99	34.1299
IPMa	-Spot 106	170.954	1.92257	1.83402	1.35268	0.179238	1.04801	1057.72	8.88865	1062.81	10.2686	1047.26	17.2631	1047.26	17.2631
IPMa	-Spot 117	166.9	2.37688	1.51681	1.88518	0.148033	1.46712	937.192	11.5367	889.926	12.1952	1050.04	23.8795	1050.04	23.8795
IPMa	-Spot 256	179.093	2.6107	1.69273	1.46019	0.1649	1.18578	1005.79	9.32068	983.948	10.8207	1053.72	17.1832	1053.72	17.1832
IPMa	-Spot 88	115.85	1.31781	1.8922	1.46605	0.184084	1.17822	1078.35	9.73939	1089.25	11.8081	1056.42	17.5855	1056.42	17.5855
IPMa	-Spot 251	68.1747	1.58742	1.88557	1.92828	0.183182	1.59144	1076.03	12.7948	1084.33	15.8833	1059.25	21.916	1059.25	21.916
IPMa	-Spot 208	379.194	3.34232	1.80774	1.33469	0.175539	1.03533	1048.26	8.72571	1042.56	9.96637	1060.17	16.943	1060.17	16.943
IPMa	-Spot 286	440.69	2.28641	1.84955	1.45356	0.179561	1.26637	1063.27	9.58002	1064.57	12.4271	1060.61	14.3595	1060.61	14.3595
IPMa	-Spot 294	276.749	0.974991	1.88924	1.21114	0.183406	0.917895	1077.32	8.04149	1085.55	9.17044	1060.71	15.8904	1060.71	15.8904
IPMa	-Spot 167	553.29	2.82784	1.70988	1.62884	0.165975	1.38099	1012.24	10.4361	989.895	12.6725	1060.93	17.3782	1060.93	17.3782
IPMa	-Spot 71	310.719	3.92032	1.80761	1.36538	0.175374	1.04414	1048.21	8.92611	1041.65	10.0431	1061.93	17.688	1061.93	17.688
IPMa	-Spot 50	671.028	2.26975	1.88217	1.78322	0.182533	1.50698	1074.83	11.8248	1080.8	14.9953	1062.75	19.1782	1062.75	19.1782
IPMa	-Spot 241	79.886	2.49171	1.80483	1.7093	0.175005	1.48006	1047.21	11.1685	1039.63	14.2104	1063.07	17.1909	1063.07	17.1909
IPMa	-Spot 115	263.034	5.4101	1.68096	1.42136	0.162941	0.861006	1001.35	9.04926	973.1	7.77674	1063.73	22.7666	1063.73	22.7666
IPMa	-Spot 143	559.734	2.0217	1.64181	1.76772	0.159015	1.64142	986.41	11.1554	951.302	14.5174	1065.39	13.1887	1065.39	13.1887
IPMa	-Spot 266	22.0139	1.32194	1.79196	1.81749	0.173012	0.891436	1042.54	11.8451	1028.68	8.47582	1071.72	31.827	1071.72	31.827
IPMa	-Spot 18	248.76	1.29178	1.82929	1.59372	0.176442	1.3296	1056.02	10.4631	1047.51	12.855	1073.69	17.648	1073.69	17.648
IPMa	-Spot 231	193.232	1.89987	1.80972	1.36842	0.174495	1.02926	1048.98	8.94969	1036.83	9.85766	1074.38	18.1098	1074.38	18.1098
IPMa	-Spot 122	73.9203	2.9868	1.91711	1.50268	0.184394	1.14167	1087.06	10.0278	1090.94	11.458	1079.3	19.5883	1079.3	19.5883
IPMa	-Spot 116	80.7516	1.51236	1.84083	1.48343	0.176783	1.0553	1060.16	9.76063	1049.37	10.2197	1082.44	20.8922	1082.44	20.8922
IPMa	-Spot 306	519.939	12.6091	1.89996	1.68799	0.18181	1.38377	1081.08	11.2298	1076.86	13.7231	1089.58	19.3501	1089.58	19.3501
IPMa	-Spot 173	429.509	3.07933	1.9067	1.8309	0.182285	1.55259	1083.43	12.1954	1079.45	15.4314	1091.47	19.4196	1091.47	19.4196
IPMa	-Spot 221	138.983	0.612489	1.75464	1.61037	0.167492	1.36057	1028.87	10.4159	998.277	12.5829	1094.49	17.2295	1094.49	17.2295
IPMa	-Spot 108	29.8056	1.16541	1.92055	1.84505	0.182728	1.32888	1088.26	12.3202	1081.86	13.235	1101.09	25.5978	1101.09	25.5978
IPMa	-Spot 236	52.5207	1.21764	1.77471	1.85025	0.168791	1.41588	1036.24	12.0168	1005.44	13.1813	1101.81	23.8228	1101.81	23.8228
IPMa	-Spot 54	719.803	4.30291	1.89064	1.76547	0.179707	1.51173	1077.81	11.7253	1065.38	14.8452	1103.05	18.2312	1103.05	18.2312
IPMa	-Spot 119	24.4951	2.12595	1.9939	2.0235	0.189066	1.38693	1113.45	13.6844	1116.31	14.2161	1107.83	29.4494	1107.83	29.4494
IPMa	-Spot 126	193.295	3.45764	1.99965	1.53523	0.189411	1.30387	1115.39	10.3921	1118.18	13.3853	1109.95	16.1953	1109.95	16.1953
IPMa	-Spot 77	120.672	1.84135	1.96346	1.47219	0.18572	1.04838	1103.07	9.90446	1098.15	10.5855	1112.77	20.6187	1112.77	20.6187
IPMa	-Spot 146	208.492	2.55971	2.04581	1.39006	0.19338	1.19205	1130.9	9.48063	1139.66	12.4522	1114.15	14.2563	1114.15	14.2563
IPMa	-Spot 35	91.8708	3.11754	2.0727	1.55935	0.195421	1.28353	1139.83	10.6809	1150.67	13.5262	1119.25	17.6687	1119.25	17.6687
IPMa	-Spot 32	1242.67	4.52936	1.60066	1.546	0.150634	1.36645	970.468	9.66203	904.515	11.5318	1122.97	14.4371	1122.97	14.4371
IPMa	-Spot 223	63.6187	2.78764	1.99546	1.50629	0.186273	1.11894	1113.97	10.189	1101.15	11.3263	1139.06	20.0387	1139.06	20.0387
IPMa	-Spot 295	442.558	3.93056	2.06502	1.79696	0.192758	1.5332	1137.28	12.2936	1136.3	15.9727	1139.19	18.6348	1139.19	18.6348
IPMa	-Spot 105	61.1122	3.97235	2.0983	1.57424	0.19583	1.24861	1148.25	10.8258	1152.88	13.1812	1139.52	19.0543	1139.52	19.0543
IPMa	-Spot 166	152.645	2.54478	2.05075	1.22916	0.191219	0.868021	1132.55	8.38983	1127.97	8.98231	1141.31	17.2853	1141.31	17.2853
IPMa	-Spot 12	403.303	10.0026	1.16777	2.08655	0.108671	1.86547	785.601	11.4136	665.025	11.7874	1145.27	18.5726	1145.27	18.5726
IPMa	-Spot 141	22.9723	1.94087	1.96455	1.8068	0.181987	1.10115	1103.44	12.1581	1077.82	10.9293	1154.3	28.4301	1154.3	28.4301
IPMa	-Spot 30	79.1847	1.20586	2.20183	1.42765	0.203882	1.08488	1181.62	9.96901	1196.14	11.8439	1155.12	18.4212	1155.12	18.4212
IPMa	-Spot 287	201.831	3.01814	2.12782	1.34874	0.196974	1.02984	1157.88	9.31672	1159.04	10.9247	1155.68	17.2881	1155.68	17.2881
IPMa	-Spot 177	850.334	3.27531	1.78652	1.54188	0.165239	1.40818	1040.56	10.0378	985.825	12.8728	1157.37	12.462	1157.37	12.462
IPMa	-Spot 113	201.548	3.57251	2.12101	1.5124	0.195684	1.25073	1155.67	10.4366	1152.09	13.1953	1162.35	16.8733	1162.35	16.8733
IPMa	-Spot 45	53.0815	2.0792	2.22261	2.11729	0.204688	0.963879	1188.19	14.8285	1200.46	10.5575	1165.93	37.3322	1165.93	37.3322
IPMa	-Spot 165	1169.91	3.05724	2.17518	1.63601	0.199378	1.4624	1173.14	11.3805	1171.98	15.6714	1175.3	14.5113	1175.3	14.5113
IPMa	-Spot 124	114.627	2.20013	2.25952	1.44973	0.2047	1.12902	1199.75	10.2046	1200.52	12.3668	1198.38	17.9314	1198.38	17.9314
IPMa	-Spot 75	73.4368	3.35155	2.12401	1.79895	0.192172	1.40134	1156.64	12.4198	1133.13	14.5618	1200.94	22.2161	1200.94	22.2161
IPMa	-Spot 279	279.357	3.6171	1.94197	1.40508	0.174397	1.17928	1095.68	9.41774	1036.29	11.2891	1215.66	15.0443	1215.66	15.0443
IPMa	-Spot 67	364.643	3.35555	1.27155	3.25626	0.113774	1.59498	833.082	18.51	694.627	10.5031	1222.8	55.7918	1222.8	55.7918
IPMa	-Spot 267	155.644	2.14369	2.30299	1.49296	0.203465	1.09607	1213.21	10.5701	1193.91	11.9458	1247.7	19.8466	1247.7	19.8466
IPMa	-Spot 11	127.462	147.382	2.38097	1.17555	0.210158	0.932655	1236.9	8.40605	1229.66	10.4411	1249.52	13.9882	1249.52	13.9882
IPMa	-Spot 290	238.792	3.18557	2.33407	1.63474	0.20591	1.46436	1222.72	11.6208	1206.99	16.1187	1250.55	14.2216	1250.55	14.2216
IPMa	-Spot 197	292.099	0.271078	2.3724	1.55254	0.209068	1.24993	1234.32	11.0902	1223.85	13.9329	1252.68	18.0087	1252.68	18.0087
IPMa	-Spot 176	1064.9	5.89206	2.42147	1.64066	0.212851	1.41362	1248.99	11.7906	1243.99	15.9926	1257.63	16.2724	1257.63	16.2724
IPMa	-Spot 289	247.02	1.54545	2.28214	1.19343	0.19921	0.882047	1206.78	8.42604	1171.08	9.44555	1271.24	15.6697	1271.24	15.6697
IPMa	-Spot 159	171.737	2.15544	2.60561	1.2597	0.224528	0.997855	1302.22	9.24358	1305.76	11.7947	1296.38	14.9492	1296.38	14.9492
IPMa	-Spot 136	436.691	3.376	2.61914	1.68177	0.223052	1.47248	1306.02	12.3587	1297.98	17.3113	1319.24	15.7468	1319.24	15.7468
IPMa	-Spot 70	126.469	3.11615	2.60661	1.48389	0.221327	1.22583	1302.5	10.8899	1288.89	14.3203	1324.99	16.1944	1324.99	16.1944
IPMa	-Spot 278	314.974	2.33213	2.59703	1.49709	0.220306	1.17511	1299.8	10.9756	1283.49	13.6759	1326.81	17.9587	1326.81	17.9587
IPMa	-Spot 291	248.046	2.27297	2.75023	1.5806	0.231098	1.33713	1342.15	11.7702	1340.25	16.1807	1345.16	16.2753	1345.16	16.2753
IPMa	-Spot 22	221.188	2.90365	2.77009	1.51739	0.232477	1.27574	1347.51	11.321	1347.47	15.5126	1347.57	15.8604	1347.57	15.8604
IPMa	-Spot 191	103.924	2.85288	2.79094	1.32696	0.23369	1.094	1353.11	9.91983	1353.81	13.3589	1352	14.4898	1352	14.4898
IPMa	-Spot 284	173.397	3.21058	2.81605	1.31484	0.23528	1.07428	1359.82	9.85242	1362.11	13.1903	1356.2	14.6174	1356.2	14.6174
IPMa	-Spot 308	379.6	3.00528	2.89189	1.47991	0.241228	1.29476	1379.8	11.1662	1393.08	16.2212	1359.29	13.8143	1359.29	13.8143
IPMa	-Spot 298	172.771	2.81611	2.66112	1.50475	0.221978	1.30075	1317.73	11.1061	1292.32	15.2321	1359.29	14.5807	1359.29	14.5807
IPMa	-Spot 270	168.967	2.87447	2.68533	1.30662	0.22359	0.950616	1324.42	9.66747	1300.82	11.198	1362.8	17.2687	1362.8	17.2687
IPMa	-Spot 310	90.0928	1.71912	2.89302	1.67833	0.238126	1.29635	1380.09	12.6647	1376.94	16.0725	1384.95	20.471	1384.95	20.471
IPMa	-Spot 222	129.813	2.83803	2.84566	1.51499	0.233948	1.34708	1367.67	11.3834	1355.16	16.464	1387.24	13.309	1387.24	13.309
IPMa	-Spot 276	134.417	1.06397	2.84052	1.35661	0.233137	1.07325	1366.31	10.1884	1350.92	13.0803	1390.44	15.9232	1390.44	15.9232
IPMa	-Spot 123	182.495	3.04369	2.93401	2.28737	0.240409	2.09071	1390.73	17.3234	1388.82	26.1216	1393.64	17.7983	1393.64	17.7983
IPMa	-Spot 250	307.637	1.79184	2.85239	1.45202	0.231642	1.22384	1369.44	10.9168	1343.1	14.8381	1410.75	14.9531	1410.75	14.9531
IPMa	-Spot 234	194.814	3.14273	3.11341	1.82575	0.252659	1.4244	1436.01	14.0324	1452.18	18.5205	1412.12	21.8528	1412.12	21.8528
IPMa	-Spot 73	58.8767	1.53154	3.01996	1.33789	0.244955	1.04174	1412.67	10.2057	1412.41	13.2134	1413.06	16.0597	1413.06	16.0597
IPMa	-Spot 83	182.673	2.2165	3.05252	1.70583	0.245548	1.39069	1420.87	13.0474	1415.47	17.6736	1428.94	18.8577	1428.94	18.8577
IPMa	-Spot 6	340.229	2.9815	3.13965	1.32732	0.251429	1.14864	1442.46	10.2221	1445.84	14.8769	1437.47	12.6825	1437.47	12.6825
IPMa	-Spot 53	143.68	1.45248	3.16243	1.2559	0.252073	0.958255	1448.04	9.68887	1449.16	12.4364	1446.37	15.4607	1446.37	15.4607
IPMa	-Spot 13	440.434	3.4133	3.24976	1.80024	0.258632	1.60327	1469.12	13.9789	1482.84	21.2377	1449.33	15.587	1449.33	15.587
IPMa	-Spot 229	134.695	2.52945	3.09772	1.3825	0.246249	1.19344	1432.13	10.6123	1419.1	15.2015	1451.52	13.2812	1451.52	13.2812
IPMa	-Spot 114	278.217	2.13058	3.21576	1.33426	0.254304	1.1156	1460.96	10.3346	1460.63	14.5806	1461.42	13.9105	1461.42	13.9105
IPMa	-Spot 237	465.047	0.832194	3.23275	1.58251	0.255517	1.37615	1465.05	12.2729	1466.87	18.0543	1462.39	14.8489	1462.39	14.8489
IPMa	-Spot 263	94.7905	2.70125	3.16249	1.34891	0.249956	1.03323	1448.05	10.4064	1438.25	13.3194	1462.46	16.4791	1462.46	16.4791
IPMa	-Spot 293	208.508	3.58016	3.32994	1.4029	0.261586	1.01015	1488.1	10.9554	1497.95	13.5022	1474.07	18.4713	1474.07	18.4713
IPMa	-Spot 34	412.897	2.87185	2.92759	2.1675	0.22986	2.04763	1389.07	16.4063	1333.76	24.6705	1475.05	13.4855	1475.05	13.4855
IPMa	-Spot 274	177	3.20541	3.20269	1.32785	0.250463	1.08143	1457.81	10.275	1440.86	13.9634	1482.58	14.6029	1482.58	14.6029
IPMa	-Spot 107	650.033	2.35059	3.33709	1.6664	0.260921	1.51105	1489.77	13.0197	1494.55	20.1567	1482.96	13.3144	1482.96	13.3144
IPMa	-Spot 307	267.786	1.05854	3.32869	1.40598	0.25978	1.05151	1487.8	10.9785	1488.72	13.978	1486.49	17.6794	1486.49	17.6794
IPMa	-Spot 135	520.976	3.56061	3.33035	1.78517	0.25973	1.57026	1488.19	13.9413	1488.46	20.8706	1487.8	16.0828	1487.8	16.0828
IPMa	-Spot 262	338.181	2.61154	3.01788	1.36195	0.234823	0.999822	1412.15	10.3875	1359.73	12.2568	1492.12	17.5048	1492.12	17.5048
IPMa	-Spot 60	220.306	2.20431	3.37109	1.39828	0.262017	1.06374	1497.7	10.9502	1500.15	14.237	1494.22	17.1732	1494.22	17.1732
IPMa	-Spot 132	94.5968	1.35777	3.31756	1.57054	0.257591	1.32847	1485.19	12.2541	1477.51	17.5413	1496.17	15.8477	1496.17	15.8477
IPMa	-Spot 103	403.738	3.21983	3.31898	1.43716	0.25762	1.23334	1485.52	11.2144	1477.65	16.2866	1496.76	13.9559	1496.76	13.9559
IPMa	-Spot 81	226.185	3.07684	3.33731	1.4282	0.258791	1.10461	1489.82	11.1587	1483.65	14.6393	1498.6	17.1212	1498.6	17.1212
IPMa	-Spot 214	168.69	1.94646	3.36416	1.66367	0.260462	1.33161	1496.09	13.0226	1492.2	17.7382	1501.59	18.8532	1501.59	18.8532
IPMa	-Spot 156	94.6936	2.12207	3.45022	1.61186	0.267105	1.24194	1515.92	12.6895	1526.09	16.8767	1501.73	19.4215	1501.73	19.4215
IPMa	-Spot 150	102.065	2.44422	3.41383	1.34053	0.262215	1.0645	1507.58	10.5281	1501.17	14.2558	1516.6	15.3703	1516.6	15.3703
IPMa	-Spot 49	385.921	2.41285	3.33909	1.56034	0.256319	1.30626	1490.24	12.1927	1470.98	17.1803	1517.74	16.0971	1517.74	16.0971
IPMa	-Spot 130	116.977	3.73733	3.44896	1.23545	0.264659	0.928419	1515.63	9.72516	1513.64	12.525	1518.41	15.3725	1518.41	15.3725
IPMa	-Spot 93	253.259	2.03735	3.4235	1.34024	0.262358	1.17311	1509.8	10.5325	1501.9	15.7171	1520.9	12.2189	1520.9	12.2189
IPMa	-Spot 304	269.253	2.20326	3.35472	1.69061	0.256897	1.48409	1493.89	13.225	1473.94	19.5542	1522.3	15.2634	1522.3	15.2634
IPMa	-Spot 66	417.657	3.70623	3.44929	1.70034	0.26228	1.52057	1515.71	13.3853	1501.5	20.3674	1535.59	14.3201	1535.59	14.3201
IPMa	-Spot 80	336.283	3.41348	3.26752	1.39933	0.24844	1.04371	1473.35	10.8795	1430.42	13.3891	1535.74	17.5393	1535.74	17.5393
IPMa	-Spot 196	292.855	1.72536	2.91099	1.42973	0.220845	1.30914	1384.77	10.8058	1286.34	15.2663	1539.88	10.8092	1539.88	10.8092
IPMa	-Spot 44	593.823	221.409	3.61123	1.72766	0.273486	1.51078	1552.01	13.7389	1558.47	20.9152	1543.2	15.7555	1543.2	15.7555
IPMa	-Spot 172	439.928	1.88388	3.44788	2.42953	0.258079	1.97311	1515.39	19.125	1480.01	26.0925	1565.15	26.5726	1565.15	26.5726
IPMa	-Spot 151	200.755	2.40423	3.69324	1.48599	0.274596	1.27785	1569.91	11.8741	1564.09	17.7468	1577.72	14.1933	1577.72	14.1933
IPMa	-Spot 199	110.878	1.87357	3.8766	1.51561	0.286206	1.26783	1608.82	12.2341	1622.54	18.1864	1590.89	15.5157	1590.89	15.5157
IPMa	-Spot 292	148.332	2.42996	3.79692	1.35048	0.280291	1.03545	1592.09	10.8543	1592.83	14.6133	1591.11	16.1957	1591.11	16.1957
IPMa	-Spot 112	458.951	1.57842	3.87271	1.69573	0.285708	1.48959	1608.01	13.6854	1620.04	21.3386	1592.27	15.1366	1592.27	15.1366
IPMa	-Spot 296	141.77	1.74644	3.80683	1.58328	0.28059	1.33306	1594.19	12.7325	1594.33	18.8291	1593.98	15.9534	1593.98	15.9534
IPMa	-Spot 202	134.049	5.33605	3.88534	1.31426	0.285929	1.05173	1610.64	10.6135	1621.15	15.0752	1596.9	14.713	1596.9	14.713
IPMa	-Spot 2	170.486	1.62502	4.04321	1.4983	0.296032	1.18882	1642.93	12.1974	1671.6	17.5049	1606.42	17.0015	1606.42	17.0015
IPMa	-Spot 40	209.224	4.57007	4.06817	1.13844	0.297097	0.974992	1647.95	9.279	1676.9	14.3961	1611.21	10.9502	1611.21	10.9502
IPMa	-Spot 137	39.9302	1.10618	3.86679	1.44066	0.281547	1.07728	1606.78	11.623	1599.15	15.2569	1616.78	17.8096	1616.78	17.8096
IPMa	-Spot 249	353.504	2.93376	4.0354	1.36258	0.293396	1.10974	1641.36	11.0882	1658.48	16.228	1619.49	14.7151	1619.49	14.7151
IPMa	-Spot 147	284.549	1.10109	3.52406	1.56159	0.255985	1.39529	1532.63	12.3519	1469.27	18.3322	1621.19	13.0482	1621.19	13.0482
IPMa	-Spot 138	117.156	2.84819	4.12933	1.06869	0.299553	0.774592	1660.13	8.73597	1689.09	11.5099	1623.66	13.6959	1623.66	13.6959
IPMa	-Spot 253	89.3453	1.92625	3.93491	1.37436	0.28443	1.0258	1620.89	11.1276	1613.63	14.6436	1630.31	16.9999	1630.31	16.9999
IPMa	-Spot 134	137.022	1.94176	3.96582	1.61718	0.285516	1.32929	1627.23	13.1146	1619.08	19.0324	1637.76	17.1016	1637.76	17.1016
IPMa	-Spot 52	196.414	0.959473	3.99514	1.40216	0.287607	1.1414	1633.21	11.3876	1629.56	16.4351	1637.89	15.1236	1637.89	15.1236
IPMa	-Spot 211	290.967	3.17232	4.05469	1.44746	0.291686	1.25898	1645.24	11.7902	1649.95	18.3273	1639.22	13.2606	1639.22	13.2606
IPMa	-Spot 15	246.021	1.66029	3.92588	1.57674	0.282382	1.19149	1619.03	12.7605	1603.35	16.9133	1639.46	19.1717	1639.46	19.1717
IPMa	-Spot 280	78.7167	1.54265	3.95215	1.38932	0.284262	1.16326	1624.43	11.2587	1612.79	16.5982	1639.52	14.1032	1639.52	14.1032
IPMa	-Spot 25	368.029	2.61204	3.90431	1.02198	0.280731	0.865478	1614.58	8.26132	1595.04	12.2295	1640.12	10.0898	1640.12	10.0898
IPMa	-Spot 68	235.518	1.60909	3.62329	1.72154	0.260441	1.4104	1554.66	13.7002	1492.1	18.7865	1640.72	18.325	1640.72	18.325
IPMa	-Spot 74	179.139	3.0093	3.99166	1.50756	0.28636	1.25703	1632.5	12.2415	1623.31	18.0391	1644.34	15.4417	1644.34	15.4417
IPMa	-Spot 302	321.655	2.7103	4.09743	1.37529	0.293875	1.1726	1653.79	11.2254	1660.86	17.1688	1644.8	13.3329	1644.8	13.3329
IPMa	-Spot 29	270.755	2.36197	4.02209	1.61276	0.288452	1.36542	1638.67	13.1157	1633.79	19.7056	1644.93	15.9237	1644.93	15.9237
IPMa	-Spot 89	77.8321	1.507	4.0158	1.19467	0.28789	0.948578	1637.4	9.71232	1630.97	13.6691	1645.64	13.4728	1645.64	13.4728
IPMa	-Spot 272	289.646	14.291	4.09454	1.32684	0.293465	1.00708	1653.22	10.8284	1658.82	14.7294	1646.08	16.0253	1646.08	16.0253
IPMa	-Spot 225	142.909	0.981506	4.17825	1.48647	0.299425	1.20348	1669.76	12.1792	1688.46	17.877	1646.33	16.1843	1646.33	16.1843
IPMa	-Spot 41	116.523	2.19148	4.20702	1.5188	0.301443	1.24652	1675.39	12.4605	1698.46	18.6122	1646.6	16.0953	1646.6	16.0953
IPMa	-Spot 313	67.3001	1.60498	3.84433	1.56834	0.275434	1.15049	1602.08	12.638	1568.32	16.0162	1646.74	19.769	1646.74	19.769
IPMa	-Spot 76	126.802	2.08264	3.91383	1.16097	0.28028	0.894047	1616.54	9.38953	1592.77	12.6173	1647.62	13.736	1647.62	13.736
IPMa	-Spot 153	178.678	1.66268	4.04886	1.57143	0.289638	1.21887	1644.07	12.7964	1639.72	17.6467	1649.62	18.3892	1649.62	18.3892
IPMa	-Spot 220	166.096	2.16948	4.07993	1.45478	0.291249	1.16723	1650.3	11.8643	1647.77	16.9719	1653.51	16.0902	1653.51	16.0902
IPMa	-Spot 24	256.999	1.16363	4.08839	1.28368	0.291147	1.02661	1651.99	10.4731	1647.26	14.9232	1658	14.2722	1658	14.2722
IPMa	-Spot 160	126.538	1.68143	4.09149	1.45407	0.290892	1.18367	1652.61	11.8651	1645.99	17.1946	1661.02	15.6349	1661.02	15.6349
IPMa	-Spot 170	216.895	1.6434	4.16196	1.51453	0.295771	1.23409	1666.56	12.3998	1670.3	18.159	1661.84	16.2522	1661.84	16.2522
IPMa	-Spot 155	335.27	0.999994	4.05378	1.43152	0.287932	1.08618	1645.06	11.6597	1631.19	15.6537	1662.81	17.2585	1662.81	17.2585
IPMa	-Spot 152	486.422	1.45191	4.0806	1.69832	0.289518	1.55897	1650.43	13.8511	1639.12	22.5635	1664.85	12.4659	1664.85	12.4659
IPMa	-Spot 131	122.448	1.18739	3.99369	1.47638	0.283266	1.27429	1632.91	11.9895	1607.79	18.1329	1665.41	13.7947	1665.41	13.7947
IPMa	-Spot 14	674.373	1.18642	4.01105	1.86912	0.281317	1.6275	1636.44	15.1925	1597.99	23.0345	1686.18	16.9638	1686.18	16.9638
IPMa	-Spot 90	536.63	6.34691	3.99605	1.46362	0.278227	1.27239	1633.39	11.8873	1582.43	17.8539	1699.64	13.3251	1699.64	13.3251
IPMa	-Spot 226	181.182	2.92612	4.56798	1.38145	0.314392	0.941932	1743.45	11.5083	1762.28	14.524	1720.91	18.5669	1720.91	18.5669
IPMa	-Spot 27	464.567	3.49109	4.22872	1.83364	0.288372	1.66082	1679.61	15.0588	1633.39	23.9637	1737.83	14.2475	1737.83	14.2475
IPMa	-Spot 162	242.475	5.39216	4.50361	1.76625	0.306102	1.36573	1731.64	14.6766	1721.5	20.6335	1743.9	20.5196	1743.9	20.5196
IPMa	-Spot 271	678.682	4.32888	4.50112	1.71453	0.305538	1.52277	1731.18	14.2454	1718.71	22.9737	1746.26	14.4299	1746.26	14.4299
IPMa	-Spot 38	289.205	4.68506	4.55389	1.50099	0.308949	1.29008	1740.87	12.4972	1735.53	19.6291	1747.27	14.0497	1747.27	14.0497
IPMa	-Spot 171	257.059	3.83984	4.5171	1.54024	0.305892	1.33426	1734.12	12.8053	1720.46	20.1475	1750.63	14.085	1750.63	14.085
IPMa	-Spot 129	323.971	2.45487	4.60829	1.0492	0.311886	0.840321	1750.77	8.75404	1749.98	12.8784	1751.7	11.4977	1751.7	11.4977
IPMa	-Spot 8	264.454	2.41073	4.6391	1.32457	0.313902	1.00228	1756.33	11.0649	1759.88	15.4362	1752.1	15.8487	1752.1	15.8487
IPMa	-Spot 252	221.941	2.45327	4.52843	1.43349	0.305808	1.21186	1736.21	11.9231	1720.05	18.2954	1755.72	14.0065	1755.72	14.0065
IPMa	-Spot 64	224.129	3.69373	4.59721	1.1376	0.310004	0.878406	1748.76	9.48754	1740.72	13.4001	1758.37	13.2205	1758.37	13.2205
IPMa	-Spot 56	515.522	3.03439	4.65929	1.70352	0.312889	1.58747	1759.96	14.2417	1754.91	24.3887	1765.95	11.2917	1765.95	11.2917
IPMa	-Spot 198	583.359	3.83136	4.54625	1.51924	0.304816	1.29271	1739.48	12.6454	1715.15	19.4675	1768.84	14.5762	1768.84	14.5762
IPMa	-Spot 259	377.932	7.96398	4.58509	1.67423	0.306456	1.45306	1746.56	13.9569	1723.24	21.9724	1774.57	15.1779	1774.57	15.1779
IPMa	-Spot 139	773.331	1.62889	4.66409	1.75038	0.310949	1.49119	1760.82	14.6363	1745.38	22.8011	1779.18	16.7194	1779.18	16.7194
IPMa	-Spot 178	157.77	1.70059	4.54609	1.34977	0.302956	1.20785	1739.45	11.2346	1705.95	18.1043	1779.95	10.9874	1779.95	10.9874
IPMa	-Spot 182	248.192	4.71079	4.68516	1.4752	0.311469	1.31131	1764.59	12.3448	1747.93	20.0762	1784.36	12.3179	1784.36	12.3179
IPMa	-Spot 255	144.375	1.83922	4.67755	1.45428	0.310899	1.1506	1763.23	12.1663	1745.13	17.5912	1784.73	16.2118	1784.73	16.2118
IPMa	-Spot 163	857.145	10.2796	4.4942	1.65521	0.298445	1.4574	1729.9	13.7486	1683.59	21.5943	1786.36	14.2996	1786.36	14.2996
IPMa	-Spot 99	156.917	9.56572	4.75714	1.33924	0.315596	1.09457	1777.37	11.2369	1768.18	16.9267	1788.15	14.0597	1788.15	14.0597
IPMa	-Spot 183	298.794	2.67912	4.92126	1.3479	0.325951	1.03961	1805.91	11.3755	1818.73	16.4745	1791.13	15.6258	1791.13	15.6258
IPMa	-Spot 157	261.719	2.10021	4.8871	1.53812	0.323514	1.15381	1800.03	12.9656	1806.87	18.181	1792.11	18.5232	1792.11	18.5232
IPMa	-Spot 175	193.911	3.61223	4.8302	1.37531	0.319526	1.17175	1790.17	11.5699	1787.41	18.2913	1793.37	13.1122	1793.37	13.1122
IPMa	-Spot 189	163.347	0.974553	4.94012	1.61254	0.326722	1.34787	1809.14	13.6178	1822.48	21.3977	1793.79	16.1166	1793.79	16.1166
IPMa	-Spot 100	302.57	2.01313	4.83879	1.34445	0.319954	1.17686	1791.67	11.3138	1789.51	18.3897	1794.17	11.8362	1794.17	11.8362
IPMa	-Spot 133	468.555	2.38897	4.75146	1.98558	0.314066	1.84562	1776.37	16.6573	1760.68	28.436	1794.83	13.3322	1794.83	13.3322
IPMa	-Spot 300	155.554	2.0496	4.89462	1.60178	0.323307	1.32906	1801.33	13.5058	1805.86	20.9324	1796.08	16.2733	1796.08	16.2733
IPMa	-Spot 96	329.945	2.95048	4.78286	1.49981	0.314854	1.25742	1781.89	12.5961	1764.55	19.4103	1802.25	14.8709	1802.25	14.8709
IPMa	-Spot 4	190.063	3.41731	4.84659	1.41579	0.318913	1.16096	1793.02	11.9174	1784.42	18.0964	1803.03	14.7368	1803.03	14.7368
IPMa	-Spot 10	582.884	55.712	4.8938	1.80453	0.321949	1.57616	1801.19	15.2152	1799.24	24.7454	1803.43	15.9788	1803.43	15.9788
IPMa	-Spot 148	166.926	2.30557	4.91907	1.23243	0.323407	0.992772	1805.53	10.4001	1806.35	15.6396	1804.58	13.2781	1804.58	13.2781
IPMa	-Spot 180	375.947	2.0436	4.80911	1.98214	0.315524	1.7576	1786.49	16.6632	1767.83	27.1753	1808.34	16.6547	1808.34	16.6547
IPMa	-Spot 111	152.525	4.48228	4.8775	1.53814	0.319777	1.25565	1798.38	12.9615	1788.64	19.6125	1809.67	16.1436	1809.67	16.1436
IPMa	-Spot 297	266.408	3.42974	4.83489	1.76566	0.316979	1.59732	1790.99	14.8567	1774.96	24.7835	1809.7	13.6724	1809.7	13.6724
IPMa	-Spot 42	91.4104	1.38307	4.97637	1.35089	0.325894	1.08508	1815.32	11.4221	1818.45	17.1929	1811.71	14.6186	1811.71	14.6186
IPMa	-Spot 97	95.5244	1.22483	5.09046	1.54424	0.331574	1.30567	1834.52	13.1062	1846.01	20.9589	1821.49	14.9619	1821.49	14.9619
IPMa	-Spot 46	234.513	1.96786	4.47173	1.4135	0.291087	1.25338	1725.74	11.73	1646.96	18.2166	1822.64	11.8554	1822.64	11.8554
IPMa	-Spot 158	46.8629	0.779125	4.95156	1.75385	0.32223	1.43462	1811.09	14.8172	1800.61	22.5381	1823.16	18.3035	1823.16	18.3035
IPMa	-Spot 201	640.578	1.73141	4.87787	1.61109	0.317141	1.35838	1798.44	13.5765	1775.75	21.0844	1824.83	15.7124	1824.83	15.7124
IPMa	-Spot 161	289.871	1.55463	5.09516	1.49505	0.331251	1.22542	1835.3	12.6906	1844.44	19.6563	1824.93	15.5344	1824.93	15.5344
IPMa	-Spot 84	335.794	2.57666	5.07492	1.44622	0.329732	1.24767	1831.92	12.268	1837.08	19.9442	1826.05	13.263	1826.05	13.263
IPMa	-Spot 188	234.355	2.30652	4.77878	1.31582	0.310345	1.06318	1781.18	11.0491	1742.41	16.2325	1826.9	14.058	1826.9	14.058
IPMa	-Spot 7	753.388	18.1912	4.74214	1.53244	0.307722	1.29761	1774.72	12.851	1729.49	19.6836	1828.34	14.7801	1828.34	14.7801
IPMa	-Spot 203	244.292	4.38514	5.07311	1.31187	0.327856	1.00652	1831.62	11.1276	1827.98	16.0204	1835.74	15.2426	1835.74	15.2426
IPMa	-Spot 61	557.986	1.92358	5.11226	1.47046	0.330126	1.24894	1838.14	12.4887	1838.99	19.9825	1837.17	14.0582	1837.17	14.0582
IPMa	-Spot 282	238.911	3.33355	5.16077	1.50009	0.331079	1.2133	1846.17	12.7599	1843.61	19.4543	1849.04	15.9532	1849.04	15.9532
IPMa	-Spot 23	248.67	2.7596	5.17585	1.64919	0.330679	1.5017	1848.65	14.035	1841.67	24.0567	1856.5	12.3169	1856.5	12.3169
IPMa	-Spot 181	188.434	1.8675	5.11861	1.46522	0.326808	1.12429	1839.2	12.4467	1822.89	17.8519	1857.69	16.9747	1857.69	16.9747
IPMa	-Spot 140	265.26	70.2738	5.29442	1.4636	0.33558	1.25527	1867.96	12.5007	1865.37	20.3321	1870.83	13.5764	1870.83	13.5764
IPMa	-Spot 9	173.68	1.85223	5.41601	1.56885	0.342942	1.22989	1887.39	13.4478	1900.81	20.2465	1872.64	17.5663	1872.64	17.5663
IPMa	-Spot 47	299.256	2.30794	5.12562	1.37484	0.323641	1.2417	1840.36	11.6815	1807.48	19.5718	1877.73	10.6381	1877.73	10.6381
IPMa	-Spot 207	302.989	1.64126	5.11367	1.46068	0.322131	1.25438	1838.38	12.4062	1800.13	19.7018	1881.95	13.4809	1881.95	13.4809
IPMa	-Spot 142	649.708	2.51027	5.23644	1.61069	0.329808	1.31563	1858.57	13.7331	1837.45	21.0342	1882.26	16.7376	1882.26	16.7376
IPMa	-Spot 273	515.117	7.73125	4.6767	1.64665	0.292348	1.51325	1763.08	13.7753	1653.25	22.0675	1895.78	11.6748	1895.78	11.6748
IPMa	-Spot 59	379.315	1.17054	5.26351	1.23053	0.328943	1.05475	1862.96	10.5001	1833.25	16.8299	1896.26	11.3967	1896.26	11.3967
IPMa	-Spot 309	265.105	3.44635	5.31851	1.3642	0.328658	1.11324	1871.84	11.6601	1831.87	17.7516	1916.49	14.1448	1916.49	14.1448
IPMa	-Spot 62	293.626	2.87344	5.50612	1.43564	0.339962	1.09635	1901.55	12.3373	1886.49	17.9312	1918.02	16.624	1918.02	16.624
IPMa	-Spot 55	639.815	7.4287	5.44873	1.48663	0.335563	1.31082	1892.56	12.7549	1865.29	21.231	1922.59	12.571	1922.59	12.571
IPMa	-Spot 248	110.637	1.53941	5.56062	1.305	0.338908	1.10866	1910.02	11.2315	1881.42	18.0905	1941.22	12.3148	1941.22	12.3148
IPMa	-Spot 311	80.781	1.67331	5.81118	1.41771	0.349719	1.04921	1948.08	12.2823	1933.26	17.5249	1963.85	17.0087	1963.85	17.0087
IPMa	-Spot 184	292.155	1.94342	5.99178	1.51484	0.356148	1.291	1974.65	13.1823	1963.89	21.8559	1985.93	14.1008	1985.93	14.1008
IPMa	-Spot 43	127.989	0.974554	6.11912	1.25138	0.360762	1.03289	1992.98	10.9219	1985.79	17.6527	2000.43	12.5486	2000.43	12.5486
IPMa	-Spot 205	250.673	0.952756	6.03671	1.48683	0.352898	1.22631	1981.16	12.9522	1948.42	20.6206	2015.48	14.91	2015.48	14.91
IPMa	-Spot 281	314.372	1.86571	6.3212	1.30106	0.36791	1.05091	2021.4	11.4068	2019.56	18.2209	2023.26	13.5886	2023.26	13.5886
IPMa	-Spot 209	56.3732	1.76139	6.71411	1.48257	0.385938	1.16539	2074.48	13.1031	2103.96	20.9201	2045.31	16.1953	2045.31	16.1953
IPMa	-Spot 28	97.5222	1.40085	11.7731	1.20968	0.486708	1.05588	2586.53	11.3217	2556.42	22.2831	2610.18	9.83122	2610.18	9.83122
IPMa	-Spot 312	216.544	3.32436	11.9382	1.36213	0.487082	1.1686	2599.57	12.7625	2558.04	24.6749	2632.08	11.6278	2632.08	11.6278
IPMa	-Spot 228	255.005	2.06916	12.13	1.22487	0.493637	0.937509	2614.51	11.4904	2586.39	19.9737	2636.35	13.0926	2636.35	13.0926
IPMa	-Spot 288	162.477	0.858289	12.2849	1.43541	0.498066	1.22389	2626.42	13.4786	2605.48	26.2312	2642.57	12.4492	2642.57	12.4492
IPMa	-Spot 78	131.984	2.17324	12.2942	1.08988	0.496837	0.841591	2627.13	10.2344	2600.19	18.0078	2647.94	11.4889	2647.94	11.4889
IPMa	-Spot 257	318.07	1.85845	12.5383	1.48017	0.498795	1.22989	2645.6	13.9202	2608.62	26.3857	2674	13.6333	2674	13.6333
IPMa	-Spot 110	255.539	0.63432	12.864	1.42027	0.51004	1.25362	2669.75	13.3818	2656.8	27.2962	2679.55	11.0412	2679.55	11.0412
IPMa	-Spot 314	1067.39	2.95524	11.3524	1.74352	0.448545	1.51706	2552.52	16.2716	2388.78	30.283	2685.29	14.2064	2685.29	14.2064
IPMa	-Spot 227	545.662	10.0562	11.8677	1.78413	0.467885	1.57658	2594.02	16.7094	2474.28	32.3956	2688.9	13.8026	2688.9	13.8026
IPMa	-Spot 87	338.594	1.39615	13.51	1.52231	0.532363	1.30632	2715.98	14.393	2751.4	29.2562	2689.73	12.9169	2689.73	12.9169
IPMa	-Spot 238	129.455	1.11538	13.0661	1.5557	0.514862	1.24814	2684.44	14.6743	2677.35	27.3464	2689.76	15.3467	2689.76	15.3467
IPMa	-Spot 301	274.223	2.24595	12.7856	1.31416	0.502072	0.999166	2663.98	12.3765	2622.7	21.5294	2695.47	14.0994	2695.47	14.0994
IPMa	-Spot 247	28.9096	0.791131	11.9709	1.33401	0.469836	1.06315	2602.13	12.5016	2482.84	21.9074	2696.33	13.3079	2696.33	13.3079
IPMa	-Spot 187	120.861	213.853	13.425	1.91822	0.526164	1.54242	2710.02	18.129	2725.27	34.2803	2698.66	18.8317	2698.66	18.8317
IPMa	-Spot 299	79.0132	1.16974	11.941	1.67695	0.465987	1.4744	2599.79	15.7129	2465.94	30.2121	2705.78	13.1862	2705.78	13.1862
IPMa	-Spot 98	176.357	1.38797	11.0945	1.83628	0.43097	1.65045	2531.1	17.1053	2310.09	32.0435	2713.35	13.2762	2713.35	13.2762
IPMa	-Spot 102	390.336	2.72219	13.748	1.1947	0.533409	0.932811	2732.5	11.3087	2755.8	20.9178	2715.32	12.3086	2715.32	12.3086
IPMa	-Spot 244	76.1366	0.41036	13.612	1.57554	0.526952	1.27433	2723.1	14.904	2728.59	28.3496	2719.01	15.2728	2719.01	15.2728
IPMa	-Spot 240	55.2317	0.609501	13.3204	1.54892	0.515253	1.2963	2702.63	14.6302	2679.02	28.4159	2720.33	13.9736	2720.33	13.9736
IPMa	-Spot 154	44.5619	1.14446	12.9753	1.49806	0.501483	1.18376	2677.86	14.1236	2620.17	25.487	2721.71	15.127	2721.71	15.127
IPMa	-Spot 120	70.577	0.467435	13.7379	1.24752	0.529467	0.993035	2731.81	11.8082	2739.21	22.1607	2726.33	12.4355	2726.33	12.4355
IPMa	-Spot 72	195.995	1.47764	13.8028	1.25889	0.531896	0.95172	2736.27	11.9196	2749.44	21.3023	2726.56	13.5707	2726.56	13.5707
IPMa	-Spot 239	31.4407	0.808217	13.4454	1.50542	0.517054	1.15791	2711.45	14.2286	2686.67	25.4407	2729.96	15.8394	2729.96	15.8394
IPMa	-Spot 232	178.171	5.11468	13.5882	1.39974	0.519899	1.22329	2721.44	13.2392	2698.75	26.9746	2738.31	11.191	2738.31	11.191
IPMa	-Spot 218	110.066	1.78114	13.7669	1.46244	0.526735	1.2569	2733.81	13.8446	2727.68	27.9544	2738.32	12.2985	2738.32	12.2985
IPMa	-Spot 21	68.8143	1.54519	13.7829	1.2458	0.526122	1.04564	2734.91	11.7944	2725.09	23.238	2742.15	11.1365	2742.15	11.1365
IPMa	-Spot 275	55.1165	1.21268	14.6286	1.33332	0.534729	1.02185	2791.39	12.6727	2761.35	22.9513	2813.17	13.9974	2813.17	13.9974
IPMa	-Spot 303	53.93	1.98926	15.3712	1.40781	0.549957	1.19462	2838.53	13.4223	2824.99	27.3249	2848.14	12.1351	2848.14	12.1351
IPMa	-Spot 204	29.4548	2.65471	15.198	1.75877	0.54229	1.35773	2827.73	16.7573	2793.03	30.7751	2852.54	18.2067	2852.54	18.2067
IPMa	-Spot 26	73.0658	2.18647	15.7411	1.46768	0.560653	1.29684	2861.22	14.0133	2869.33	30.0327	2855.5	11.189	2855.5	11.189
IPMa	-Spot 168	111.992	1.36192	17.2154	1.49648	0.568825	1.2617	2946.92	14.3617	2902.99	29.4905	2977.03	12.9586	2977.03	12.9586
IPMa	-Spot 48	131.769	2.47502	21.3617	1.16224	0.602459	1.04541	3155.15	11.2739	3039.74	25.3365	3229.39	8.01355	3229.39	8.01355
IPMa	-Spot 94	260.325	19.5817	30.8987	1.23625	0.72409	1.02525	3515.83	12.1597	3511.36	27.7578	3518.38	10.658	3518.38	10.658
Mk	6188.59	846.108	1.96553	0.495475	4.01716	0.0572942	3.61152	408.635	13.515	359.149	12.616	698.748	37.4709	359.149	12.616
Mk	2600.76	232.361	2.54665	0.433788	1.67428	0.062472	1.08945	365.862	5.14344	390.642	4.12945	211.645	29.475	390.642	4.12945
Mk	23816.1	232.177	1.91926	0.48162	1.89936	0.0641699	1.25841	399.184	6.26917	400.935	4.8917	389.033	31.939	400.935	4.8917
Mk	5687.24	334.142	5.34769	0.471654	1.59934	0.0642154	1.26112	392.331	5.20467	401.211	4.90553	340.34	22.2718	401.211	4.90553
Mk	18100.3	440.818	2.206	0.488234	1.39774	0.0647976	1.04766	403.706	4.65603	404.736	4.10988	397.796	20.7394	404.736	4.10988
Mk	42737.3	364.851	3.74051	0.516346	1.50207	0.0660517	1.18759	422.707	5.19356	412.324	4.7434	479.724	20.3317	412.324	4.7434
Mk	39919.5	507.318	0.621441	0.557616	2.38495	0.0678129	2.00895	449.974	8.66951	422.965	8.22438	590.444	27.8747	422.965	8.22438
Mk	115251	405.182	1.58175	0.526902	1.43618	0.0683406	1.0982	429.752	5.03222	426.15	4.52866	449.085	20.5608	426.15	4.52866
Mk	4.48629e+06	384.365	5.20901	0.513803	1.36805	0.0683926	1.1126	421.003	4.71478	426.464	4.59128	391.177	17.8641	426.464	4.59128
Mk	27474.8	599.52	2.49252	0.534791	1.7793	0.0688342	1.47163	434.984	6.29536	429.129	6.10956	466.084	22.1627	429.129	6.10956
Mk	12304.3	238.848	1.34076	0.548656	1.92305	0.0691152	1.25523	444.116	6.91789	430.823	5.23108	513.571	31.9887	430.823	5.23108
Mk	39677.4	778.53	1.90301	0.547718	2.04395	0.0699478	1.83729	443.501	7.3447	435.841	7.74296	483.461	19.7667	435.841	7.74296
Mk	21222.7	260.476	1.55741	0.538851	1.84837	0.070072	1.37899	437.666	6.57199	436.589	5.82118	443.316	27.3853	436.589	5.82118
Mk	13139.3	252.23	0.849517	0.545922	1.78537	0.0710764	1.35677	442.322	6.40189	442.637	5.80403	440.661	25.8256	442.637	5.80403
Mk	83218.1	244.249	1.29858	0.549218	1.69732	0.071352	1.29175	444.484	6.10984	444.296	5.54586	445.441	24.4973	444.296	5.54586
Mk	34315.6	247.782	1.37503	0.562984	1.98206	0.0730391	1.45188	453.467	7.24931	454.44	6.37073	448.519	29.9793	454.44	6.37073
Mk	35553.1	647.896	2.3274	0.557825	1.58806	0.0731517	1.35181	450.11	5.77405	455.116	5.94014	424.594	18.5937	455.116	5.94014
Mk	325248	856.789	0.886579	0.581212	1.53793	0.0738578	1.26183	465.24	5.74003	459.356	5.59458	494.408	19.3583	459.356	5.59458
Mk	17295.3	457.118	2.41129	0.584629	1.39709	0.0758205	1.11368	467.432	5.23372	471.127	5.0597	449.303	18.7583	471.127	5.0597
Mk	44138	431.047	2.98327	0.601703	1.13195	0.076011	0.78297	478.314	4.31778	472.268	3.56552	507.425	17.9792	472.268	3.56552
Mk	28600.7	610.958	1.16849	0.604034	1.61147	0.0761456	1.42159	479.79	6.16178	473.075	6.48436	512.016	16.6953	473.075	6.48436
Mk	10668.4	611.198	4.78716	0.628063	1.80106	0.0765658	1.49011	494.889	7.055	475.592	6.83174	585.213	21.9573	475.592	6.83174
Mk	13756.4	285.019	1.48487	0.589386	1.72126	0.0770481	1.35609	470.476	6.48115	478.479	6.25366	431.599	23.626	478.479	6.25366
Mk	30834.6	507.922	3.59573	0.626551	1.51316	0.0805025	1.1462	493.945	5.91844	499.122	5.50505	470.04	21.8781	499.122	5.50505
Mk	15341.5	114.066	1.47332	0.696651	1.94906	0.087549	1.12283	536.789	8.12618	541.025	5.82686	518.807	34.9714	541.025	5.82686
Mk	3948.18	53.1739	1.96609	0.700642	1.98773	0.0925797	1.17661	539.174	8.31534	570.776	6.4271	407.65	35.8502	570.776	6.4271
Mk	14158.9	434.568	1.64884	0.773939	1.88956	0.096621	1.38004	582.02	8.37083	594.576	7.83836	533.316	28.2486	594.576	7.83836
Mk	29882.4	188.686	1.25861	0.872482	1.89717	0.102023	1.59125	636.914	8.97607	626.253	9.49652	674.909	22.0983	626.253	9.49652
Mk	81441.1	175.856	2.36027	1.26145	1.32572	0.136369	1.0086	828.559	7.50884	824.097	7.80248	840.564	17.8922	824.097	7.80248
Mk	52345.6	610.214	2.85669	1.54186	1.76762	0.16057	1.51939	947.247	10.8875	959.946	13.5513	917.869	18.578	917.869	18.578
Mk	7406.21	74.2528	2.92964	1.59116	1.63628	0.16374	1.34877	966.753	10.2029	977.526	12.2336	942.332	18.9904	942.332	18.9904
Mk	74521.2	259.83	3.22739	1.68903	1.23652	0.170385	0.904275	1004.4	7.88645	1014.23	8.48637	983.016	17.1584	983.016	17.1584
Mk	25690.5	104.238	1.66158	1.6582	1.75178	0.167174	1.37816	992.689	11.0963	996.522	12.7248	984.211	21.9958	984.211	21.9958
Mk	123580	203.623	3.00556	1.70956	1.5591	0.172349	1.3389	1012.12	9.98855	1025.04	12.6887	984.241	16.2574	984.241	16.2574
Mk	9023.03	94.811	2.39566	1.69195	1.76722	0.169886	1.29464	1005.5	11.2787	1011.49	12.1195	992.494	24.4582	992.494	24.4582
Mk	34063.8	455.86	2.17253	1.65779	1.58778	0.16611	1.29967	992.53	10.0564	990.64	11.9346	996.69	18.5337	996.69	18.5337
Mk	7983.56	76.4662	1.95178	1.75043	1.6449	0.175357	0.869261	1027.32	10.6299	1041.56	8.3603	997.106	28.3624	997.106	28.3624
Mk	320183	556.973	4.95489	1.72989	1.37456	0.172123	1.13472	1019.71	8.84458	1023.8	10.7416	1010.93	15.7285	1010.93	15.7285
Mk	30455.8	152.674	2.72365	1.67785	1.68437	0.16628	1.32302	1000.17	10.7164	991.581	12.1596	1019.02	21.1094	1019.02	21.1094
Mk	12898.7	80.7838	2.40407	1.71482	1.52206	0.169726	1.09625	1014.09	9.76234	1010.6	10.254	1021.61	21.3927	1021.61	21.3927
Mk	50497.3	286.048	2.05517	1.72299	1.38124	0.170397	1.16324	1017.14	8.87455	1014.3	10.9174	1023.24	15.0726	1023.24	15.0726
Mk	7621.51	79.2335	0.885804	1.77341	1.63903	0.175311	1.26242	1035.77	10.6421	1041.31	12.1389	1024.08	21.1703	1024.08	21.1703
Mk	20622.5	163.736	0.91705	1.70404	1.46052	0.168335	1.1362	1010.05	9.34583	1002.93	10.5531	1025.5	18.5843	1025.5	18.5843
Mk	671155	983.081	51.5758	1.75522	1.41959	0.172905	1.27774	1029.09	9.18292	1028.1	12.1424	1031.18	12.5222	1031.18	12.5222
Mk	11257.3	77.5713	1.84298	1.80105	1.96151	0.177214	1.45388	1045.84	12.8071	1051.74	14.1088	1033.52	26.6245	1033.52	26.6245
Mk	407740	1099.86	11.8832	1.79612	1.62452	0.175296	1.44827	1044.05	10.5962	1041.22	13.925	1049.99	14.8518	1049.99	14.8518
Mk	26400.6	165.62	1.0348	1.82791	1.51218	0.178368	1.14588	1055.53	9.92516	1058.05	11.1814	1050.33	19.9056	1050.33	19.9056
Mk	34649.2	67.9792	1.70119	1.88107	1.40015	0.183186	1.08682	1074.44	9.28255	1084.36	10.8471	1054.39	17.7987	1054.39	17.7987
Mk	9478.76	38.0123	2.40994	1.82022	1.72759	0.177162	1.38768	1052.76	11.3222	1051.45	13.463	1055.5	20.724	1055.5	20.724
Mk	56168.7	166.739	1.77586	1.82736	1.52162	0.177837	1.14914	1055.33	9.98604	1055.15	11.1848	1055.73	20.0973	1055.73	20.0973
Mk	79833	77.8474	2.35526	1.83448	1.50128	0.178178	1.09425	1057.89	9.8661	1057.01	10.6679	1059.71	20.7052	1059.71	20.7052
Mk	34508.1	261.562	1.37242	1.82456	1.97336	0.176929	1.79373	1054.32	12.944	1050.18	17.3831	1062.94	16.5487	1062.94	16.5487
Mk	152867	220.121	3.70855	1.85249	1.41344	0.179334	1.07744	1064.32	9.32077	1063.33	10.5618	1066.36	18.3808	1066.36	18.3808
Mk	67325.4	162.871	1.41796	1.78735	1.696	0.17225	1.41943	1040.86	11.0431	1024.5	13.4453	1075.4	18.6209	1075.4	18.6209
Mk	175655	208.987	1.41062	1.88233	1.37349	0.180736	1.0577	1074.88	9.10794	1070.99	10.4369	1082.8	17.5749	1082.8	17.5749
Mk	18473	386.507	3.2104	1.93825	1.62644	0.183378	1.37412	1094.4	10.8945	1085.4	13.7267	1112.31	17.3806	1112.31	17.3806
Mk	32165	1012.33	5.89393	1.57449	2.37027	0.148786	2.15893	960.199	14.72	894.153	18.0252	1114.72	19.5477	1114.72	19.5477
Mk	25868.2	211.314	3.02631	2.01733	1.36445	0.189733	0.956949	1121.36	9.26306	1119.93	9.83786	1124.14	19.3905	1124.14	19.3905
Mk	35289.7	488.181	3.94234	1.95866	2.05761	0.183739	1.86681	1101.42	13.832	1087.37	18.6795	1129.3	17.2543	1129.3	17.2543
Mk	122764	229.233	3.43403	2.05772	1.33647	0.190465	1.0261	1134.86	9.1325	1123.89	10.5829	1155.89	17.008	1155.89	17.008
Mk	62970.9	757.829	2.42512	2.20444	1.63962	0.201715	1.45329	1182.45	11.4535	1184.52	15.7256	1178.68	15.0125	1178.68	15.0125
Mk	85056.2	205.765	4.76308	2.0838	1.47116	0.190336	1.06592	1143.49	10.0942	1123.2	10.9874	1182.2	20.0412	1182.2	20.0412
Mk	27731.2	240.676	2.59365	2.14919	1.43946	0.19612	1.19554	1164.79	9.97516	1154.45	12.6367	1184.11	15.8323	1184.11	15.8323
Mk	37379.1	480.468	1.48565	2.22681	1.69273	0.202969	1.37634	1189.51	11.8617	1191.25	14.97	1186.38	19.4828	1186.38	19.4828
Mk	92626	392.045	4.28835	2.14374	1.38751	0.195239	1.1114	1163.03	9.60736	1149.69	11.7031	1187.95	16.4048	1187.95	16.4048
Mk	55105	57.3306	1.41773	2.29285	1.35436	0.207603	1.02302	1210.09	9.57594	1216.03	11.3374	1199.49	17.4934	1199.49	17.4934
Mk	50116	486.575	3.61848	2.37232	1.48215	0.212762	1.15499	1234.3	10.5872	1243.52	13.0622	1218.26	18.2531	1218.26	18.2531
Mk	16854.5	363.009	2.97939	2.42141	1.42649	0.212526	1.04631	1248.97	10.2513	1242.26	11.8223	1260.57	18.9479	1260.57	18.9479
Mk	40251.5	376.975	3.4896	2.51956	1.12488	0.217394	0.744068	1277.69	8.17676	1268.09	8.5654	1293.86	16.4101	1293.86	16.4101
Mk	33880.8	540.062	10.114	2.47308	1.26275	0.212742	0.976729	1264.19	9.13025	1243.41	11.0453	1299.72	15.5555	1299.72	15.5555
Mk	38211.7	253.095	2.08743	2.61643	1.62007	0.222949	1.32959	1305.26	11.9018	1297.44	15.6255	1318.12	17.9432	1318.12	17.9432
Mk	1.35561e+06	541.301	2.13665	2.8225	1.1541	0.2358	0.976636	1361.53	8.65306	1364.82	12.0129	1356.35	11.8565	1356.35	11.8565
Mk	15941.7	143.636	2.42573	2.84304	1.77893	0.237422	1.44414	1366.97	13.3635	1373.28	17.8621	1357.11	20.0275	1357.11	20.0275
Mk	671023	143.603	3.49003	2.83741	1.25051	0.234483	0.869075	1365.49	9.38884	1357.95	10.6415	1377.28	17.287	1377.28	17.287
Mk	60577	544.883	3.14704	2.81796	1.77466	0.232391	1.59877	1360.33	13.3007	1347.02	19.4346	1381.28	14.8004	1381.28	14.8004
Mk	156425	333.018	1.78689	2.88731	1.42561	0.237869	1.14926	1378.6	10.7521	1375.61	14.2364	1383.22	16.2036	1383.22	16.2036
Mk	58300.7	362.35	2.49592	2.89562	1.16311	0.2359	0.907436	1380.77	8.77863	1365.34	11.1655	1404.68	13.9352	1404.68	13.9352
Mk	37274.8	429.489	4.4773	2.7764	1.61575	0.225926	1.318	1349.21	12.0623	1313.11	15.658	1406.89	17.8951	1406.89	17.8951
Mk	51634.8	105.247	1.48907	3.28642	1.2903	0.256468	0.996755	1477.84	10.0453	1471.75	13.1156	1486.58	15.5204	1486.58	15.5204
Mk	85156.2	716.13	2.20392	3.44059	1.68826	0.266726	1.43683	1513.72	13.2827	1524.16	19.5033	1499.13	16.7624	1499.13	16.7624
Mk	33653.2	431.138	3.15518	2.90462	1.65844	0.223539	1.45366	1383.11	12.5274	1300.55	17.1206	1512.91	15.0669	1512.91	15.0669
Mk	166472	360.669	2.56343	3.55839	1.5354	0.272515	1.2644	1540.31	12.1707	1553.56	17.4555	1522.15	16.4202	1522.15	16.4202
Mk	42429	779.957	8.07263	3.33239	1.69794	0.248616	1.46398	1488.67	13.2619	1431.33	18.7912	1571.32	16.1086	1571.32	16.1086
Mk	1.53421e+06	273.272	2.89812	3.24243	1.77709	0.240488	1.54328	1467.37	13.7918	1389.23	19.287	1582.3	16.4783	1582.3	16.4783
Mk	306843	627.439	1.47535	3.7897	1.5989	0.274604	1.41989	1590.56	12.8461	1564.13	19.7199	1625.77	13.6707	1625.77	13.6707
Mk	35204.8	179.22	1.32569	3.97507	1.31624	0.287978	0.921369	1629.12	10.6789	1631.42	13.2802	1626.14	17.4802	1626.14	17.4802
Mk	387667	409.86	2.92854	3.85545	2.58954	0.277721	1.9993	1604.41	20.8814	1579.87	28.0137	1636.76	30.5642	1636.76	30.5642
Mk	35246.7	42.0802	1.83362	4.11741	1.65314	0.294212	1.18329	1657.76	13.5064	1662.54	17.3406	1651.7	21.3982	1651.7	21.3982
Mk	70697.3	94.6667	1.37273	3.81945	1.81443	0.272011	1.46466	1596.85	14.6017	1551	20.1908	1657.88	19.8351	1657.88	19.8351
Mk	1492.47	21.601	1.84419	3.28491	2.47729	0.233224	1.51557	1477.48	19.2859	1351.37	18.4768	1663.58	36.2709	1663.58	36.2709
Mk	598604	187.821	0.753428	4.11004	1.42956	0.290873	1.15442	1656.3	11.6754	1645.89	16.7688	1669.51	15.5929	1669.51	15.5929
Mk	576885	342.344	1.81788	4.40472	1.40688	0.304778	1.10596	1713.23	11.6426	1714.96	16.6534	1711.09	15.9966	1711.09	15.9966
Mk	108868	160.379	2.63583	4.55633	1.58141	0.306148	1.27627	1741.32	13.1682	1721.73	19.2842	1764.92	17.0628	1764.92	17.0628
Mk	2.88208e+06	353.847	2.87023	4.89716	1.35731	0.328225	1.02291	1801.77	11.4453	1829.77	16.2951	1769.5	16.2923	1769.5	16.2923
Mk	629963	688.726	3.24353	5.0208	1.65016	0.335113	1.42655	1822.84	13.9734	1863.12	23.0823	1777.1	15.1329	1777.1	15.1329
Mk	79410	315.684	2.21173	4.76177	1.92668	0.314434	1.57986	1778.18	16.1692	1762.49	24.363	1796.64	20.0723	1796.64	20.0723
Mk	1.0553e+06	680.833	5.07137	5.06556	1.12556	0.333513	0.94661	1830.36	9.54486	1855.39	15.2618	1801.99	11.0773	1801.99	11.0773
Mk	4641.23	38.3906	1.37426	5.25121	1.82623	0.335498	1.50829	1860.97	15.5781	1864.97	24.426	1856.48	18.6045	1856.48	18.6045
Mk	43587.6	125.105	2.7081	7.04611	1.2939	0.385199	0.842072	2117.26	11.5057	2100.52	15.0953	2133.55	17.1883	2133.55	17.1883
Mk	60355.9	218.178	1.16941	8.32813	1.40091	0.421221	1.16396	2267.38	12.7004	2266.02	22.2385	2268.6	13.4397	2268.6	13.4397
Mk	92948.7	235.741	2.01728	8.06498	1.7428	0.392569	1.20486	2238.33	15.7452	2134.73	21.8956	2334.47	21.5594	2334.47	21.5594
Mk	34640.9	440.955	2.33033	10.8926	1.57495	0.469993	1.26949	2514	14.6481	2483.53	26.1653	2538.68	15.6299	2538.68	15.6299
Mk	61186.8	357.875	7.01649	12.5523	1.56552	0.497928	1.32685	2646.66	14.7241	2604.88	28.4327	2678.74	13.7444	2678.74	13.7444
Mk	99196.6	673.7	2.71366	13.1718	1.77889	0.511999	1.53005	2692.04	16.7896	2665.16	33.3998	2712.28	14.9678	2712.28	14.9678
Mk	120783	141.213	2.24552	30.183	1.7217	0.699998	1.33715	3492.79	16.9228	3420.64	35.4936	3534.41	16.7208	3534.41	16.7208
Cf	8608.5	321.919	1.76803	0.122367	2.13412	0.0100811	1.47718	1367.27	14.3688	1371.13	17.79	1361.22	24.2455	1361.22	24.2455
Cf	13047	84.9445	1.09119	0.117826	2.35032	0.0102775	1.72843	1369.3	16.2675	1361.2	21.3567	1381.94	24.699	1381.94	24.699
Cf	45870.1	191.364	1.9981	0.086933	1.96142	0.0128416	1.46787	1432.84	11.9007	1440.59	15.8187	1421.33	18.139	1421.33	18.139
Cf	27069.9	391.183	5.21023	0.456239	2.13324	0.0613238	1.88158	1431.51	11.3676	1426.3	16.3584	1439.26	14.2578	1439.26	14.2578
Cf	107971	337.391	3.83805	0.631384	1.74676	0.0786229	1.49285	1446.01	12.1207	1449.83	16.9124	1440.38	16.7763	1440.38	16.7763
Cf	39322.2	194.899	1.51582	0.653617	1.55096	0.0826563	1.35456	1667.14	10.4923	1680.39	15.6532	1650.48	13.3955	1650.48	13.3955
Cf	26311.7	366.943	3.72422	2.84416	1.91254	0.23701	1.44034	1782.73	13.1199	1805.78	19.5319	1755.84	17.369	1755.84	17.369
Cf	19334.1	202.758	4.39572	2.85186	2.1637	0.235106	1.74043	1806.04	13.0535	1843.68	20.8075	1762.84	15.3837	1762.84	15.3837
Cf	57668.3	357.227	4.43354	3.1006	1.54998	0.25041	1.22532	1778.48	13.2135	1789.01	18.9721	1766.13	18.3064	1766.13	18.3064
Cf	17369.6	152.876	4.19465	3.09524	1.48118	0.24764	1.27847	1777.14	13.6201	1782.86	19.819	1770.42	18.4068	1770.42	18.4068
Cf	12667.5	31.1097	105272	3.15413	1.57209	0.252203	1.30259	1791.07	20.6338	1808.79	30.1037	1770.49	28.1095	1770.49	28.1095
Cf	163596	390.59	1.4928	4.16488	1.28139	0.297799	1.0582	1781.67	15.1346	1790.13	24.6282	1771.77	15.9688	1771.77	15.9688
Cf	6712.81	84.0945	3.46227	4.78761	1.56191	0.32329	1.24019	1784.19	15.839	1794.75	26.3134	1771.86	15.6189	1771.86	15.6189
Cf	22918	214.225	2.63203	4.92201	1.54667	0.331094	1.29765	1793.47	13.5416	1810.49	20.6927	1773.71	17.0149	1773.71	17.0149
Cf	51134.3	336.476	1.95641	4.76346	1.57443	0.319852	1.21443	1795.19	13.9785	1813.34	20.6793	1774.14	18.6452	1774.14	18.6452
Cf	216471	637.172	6.78765	4.75586	1.62333	0.318594	1.27243	1769.55	14.0152	1764.14	21.0775	1775.92	17.6349	1775.92	17.6349
Cf	60755.1	340.194	2.32803	4.83538	2.45204	0.323909	1.90868	1759.26	14.6142	1743.68	21.9118	1777.8	18.2397	1777.8	18.2397
Cf	18694	190.653	1.147	4.78161	1.80212	0.320082	1.57562	1781.75	15.2688	1784.11	23.3171	1778.98	18.8425	1778.98	18.8425
Cf	124584	305.111	1.2919	4.79597	1.885	0.321028	1.67967	1780.85	13.4203	1782.04	19.4041	1779.44	18.2515	1779.44	18.2515
Cf	123981	213.965	3.12154	4.84916	1.60858	0.324258	1.31093	1803.12	16.7832	1820.43	25.2487	1783.15	21.7598	1783.15	21.7598
Cf	33205.1	278.487	1.11112	4.85906	1.65988	0.324845	1.3083	1781.18	15.5546	1777.4	23.5808	1785.59	19.3469	1785.59	19.3469
Cf	80826.8	164.759	3.03891	4.71298	1.67305	0.314771	1.3657	1800.55	13.369	1812.3	18.6646	1786.95	19.277	1786.95	19.277
Cf	48797.5	420.148	2.76625	4.65537	1.74832	0.310604	1.43425	1777.95	13.9548	1770.15	21.0841	1787.11	17.3836	1787.11	17.3836
Cf	254753	109.939	3.00135	4.78204	1.81807	0.318849	1.49611	1775.78	15.9577	1765.93	24.2733	1787.36	19.5411	1787.36	19.5411
Cf	24892.3	170.37	3.72106	4.77691	1.59829	0.318427	1.24629	1767.88	13.7434	1747.82	21.355	1791.64	15.7481	1791.64	15.7481
Cf	69016.8	463.236	3.11009	4.90503	1.98969	0.326302	1.59199	1797.9	16.3393	1803.11	26.2057	1791.84	18.069	1791.84	18.069
Cf	23626.9	109.508	3.01691	4.77879	1.85231	0.317479	1.51799	1811.16	13.3699	1826.68	19.5798	1793.34	18.1113	1793.34	18.1113
Cf	81204.6	370.465	2.76995	4.8901	1.5858	0.32463	1.18142	1762.11	14.4136	1735.78	22.2805	1793.46	16.5482	1793.46	16.5482
Cf	83721.6	120.994	1.4112	4.76047	1.66294	0.315997	1.3621	1784.91	12.3913	1776.82	19.2126	1794.37	14.6064	1794.37	14.6064
Cf	37047.9	176.533	2.94523	4.74814	1.90243	0.315137	1.57138	1777.81	14.3614	1758.58	21.6541	1800.45	17.7279	1800.45	17.7279
Cf	22710.5	262.776	3.25219	4.7036	1.64118	0.311447	1.39491	1765.73	13.9127	1735.4	18.8019	1801.78	20.219	1801.78	20.219
Cf	31888	618.114	14.5742	4.87475	1.93911	0.322743	1.66607	1789.57	14.2227	1776.19	19.6288	1805.18	20.4124	1805.18	20.4124
Cf	44736	482.217	4.61369	4.95198	1.58255	0.327588	1.2309	1779.08	13.9196	1755.32	22.2511	1807.05	14.6924	1807.05	14.6924
Cf	17332.5	63.4417	4.08703	4.6713	1.72329	0.308999	1.46416	1783.1	18.3624	1762.56	28.0744	1807.21	21.9899	1807.21	21.9899
Cf	37148.1	181.15	3.40621	4.80007	1.47452	0.317359	1.23715	1793.66	13.94	1778.94	22.5071	1810.8	14.5998	1810.8	14.5998
Cf	30519.8	181.915	7.13688	4.75966	1.71143	0.313638	1.40692	1819.31	12.715	1821.27	19.8987	1817.04	15.0251	1817.04	15.0251
Cf	136287	498.113	3.45129	4.69152	1.66215	0.308921	1.2358	1755.69	17.0478	1700.22	26.5775	1822.36	18.1701	1822.36	18.1701
Cf	31153.2	463.372	0.920952	4.82673	1.69082	0.317231	1.26433	1834.34	16.0964	1824.5	25.802	1845.51	17.7317	1845.51	17.7317
Cf	38903.4	343.019	5.42561	4.76686	1.65835	0.312974	1.44804	1826.98	14.5799	1807.62	22.8974	1849.1	16.6702	1849.1	16.6702
Cf	52507.8	262.925	2.38315	4.78974	2.18574	0.314449	1.82047	1868.25	13.967	1880.26	21.4135	1854.89	17.6126	1854.89	17.6126
Cf	61337.4	270.269	3.87834	4.85025	1.65583	0.317792	1.44778	1851.2	15.3147	1841.01	25.4368	1862.66	15.2387	1862.66	15.2387
Cf	131966	219.303	1.59	4.99991	1.50261	0.326475	1.25417	1839.23	13.8746	1817.04	21.5832	1864.42	16.2426	1864.42	16.2426
Cf	94423.5	521.994	2.08763	4.63554	2.04095	0.301797	1.77837	1877.26	15.2969	1864.8	23.2175	1891.07	19.218	1891.07	19.218
Cf	46627.6	495.737	1.8597	5.08942	1.89658	0.327139	1.62374	1869.45	14.0969	1841.2	22.6152	1900.99	15.3413	1900.99	15.3413
Cf	29909	358.929	1.84288	5.04541	1.72038	0.323668	1.4526	1893.74	13.982	1886.2	23.0086	1902	14.7636	1902	14.7636
Cf	5800.58	2838.08	101.325	5.29618	1.63516	0.338668	1.31301	1725.98	26.7959	1566.02	42.3302	1925.8	19.2321	1925.8	19.2321
Cf	315665	250.015	2.32404	5.19136	1.79867	0.330541	1.58834	2332.17	16.2441	2345.8	28.635	2320.26	17.5078	2320.26	17.5078
Cf	31914.3	168.251	2.99905	5.11879	1.63329	0.325604	1.36308	2276.27	15.7309	2205.42	25.6982	2340.52	18.0375	2340.52	18.0375
Cf	58308.8	53.1227	9.5376	5.35234	1.78785	0.335461	1.43378	2316.52	58.506	2196.81	53.5279	2423.77	97.2719	2423.77	97.2719
Cf	63191.8	177.295	2.74862	5.30367	1.65	0.330582	1.41203	2484.91	14.7016	2511.28	29.4898	2463.4	11.9664	2463.4	11.9664
Cf	184956	629.333	38.6199	5.45628	1.62929	0.339903	1.40698	2431.56	13.818	2392.34	24.0254	2464.53	15.0801	2464.53	15.0801
Cf	9156.57	560.417	5.92136	4.473	3.22823	0.274978	3.0446	2408.4	17.1026	2244.44	30.1363	2550.05	16.0854	2550.05	16.0854
Cf	6716.98	63.5732	1.5027	8.94272	1.77855	0.438919	1.45622	2604.88	18.9076	2570.84	35.9665	2631.44	18.1302	2631.44	18.1302
Cf	30636.8	235.719	1.95552	8.4101	1.73334	0.407924	1.37588	2404.72	14.0122	2136.22	23.1834	2640.58	13.8148	2640.58	13.8148
Cf	28840.3	195.433	1.38915	8.7906	6.41034	0.406044	2.87527	2695.35	14.9626	2749.19	25.6029	2655.22	18.1899	2655.22	18.1899
Cf	23989.1	69.4855	1.34076	10.5566	1.58493	0.476334	1.41783	2687.24	16.3776	2725.2	30.5923	2658.8	17.5294	2658.8	17.5294
Cf	37708.2	132.929	0.812969	9.96514	1.49733	0.449344	1.20211	2623.56	12.3919	2571.24	20.3444	2664.18	15.0204	2664.18	15.0204
Cf	64006.6	213.549	1.69239	9.71784	1.8575	0.416472	1.58997	2664.28	19.2575	2661.25	38.9391	2666.57	16.4908	2666.57	16.4908
Cf	30435.7	141.92	1.51936	12.0061	2.01698	0.490038	1.69646	2660.94	19.8278	2652.42	42.0539	2667.42	13.7969	2667.42	13.7969
Cf	94606.7	233.323	1.34554	9.67906	1.52247	0.392891	1.27497	2680.45	16.1348	2697.48	30.9145	2667.61	16.2344	2667.61	16.2344
Cf	35932.7	372.566	5.87727	13.2182	1.58496	0.531837	1.14394	2682.86	18.2336	2702.65	35.8697	2667.96	17.3508	2667.96	17.3508
Cf	82379.7	208.758	1.40906	13.105	1.73587	0.526147	1.37651	2692.84	17.1124	2725.65	30.9052	2668.29	19.271	2668.29	19.271
Cf	36121.4	144.443	0.910461	12.2476	1.31999	0.49013	0.959484	2663.92	18.0242	2656.71	36.1152	2669.4	15.8089	2669.4	15.8089
Cf	38250.2	161.5	2.42314	12.7896	2.04462	0.511082	1.78591	2663.12	15.1619	2651.62	28.9831	2671.87	14.9444	2671.87	14.9444
Cf	29690.1	139.084	1.3787	12.7444	2.1057	0.509013	1.93395	2674.83	15.7244	2677.58	29.8531	2672.74	15.9342	2672.74	15.9342
Cf	44518.9	284.854	2.40993	13.0109	1.71102	0.519599	1.40249	2645.99	15.5547	2610.91	29.4035	2672.91	15.3466	2672.91	15.3466
Cf	75276.8	315.633	1.14638	13.0442	1.9332	0.520818	1.62479	2655.87	13.9313	2632.62	25.39	2673.61	14.9042	2673.61	14.9042
Cf	93738.4	342.71	1.76536	13.1829	1.81299	0.526254	1.3904	2667.33	15.4054	2658.69	30.9687	2673.88	13.3841	2673.88	13.3841
Cf	311008	126.317	1.75847	12.7848	1.91375	0.510018	1.65869	2681.19	17.0739	2689.78	33.0535	2674.72	16.7053	2674.72	16.7053
Cf	395750	203.082	2.19753	12.7739	1.60999	0.508826	1.33319	2672.54	14.5701	2668.8	29.2145	2675.36	12.8506	2675.36	12.8506
Cf	38249.4	147.376	1.5867	12.9336	1.66822	0.514915	1.36245	2678.16	14.6992	2681.76	25.6748	2675.44	17.0471	2675.44	17.0471
Cf	31478.8	126.623	1.6109	12.5434	1.65391	0.49933	1.36958	2686.73	16.7933	2701.45	32.8525	2675.67	16.1487	2675.67	16.1487
Cf	102376	155.789	1.32815	12.6758	1.48018	0.504387	1.17473	2663.8	14.7973	2647.78	29.4111	2675.97	13.1759	2675.97	13.1759
Cf	23731	165.087	1.32479	12.8311	1.63532	0.510483	1.42146	2686.74	13.9927	2699.26	25.1054	2677.32	15.731	2677.32	15.731
Cf	264198	207.276	1.16275	13.0213	1.81049	0.517785	1.50299	2673.61	17.3238	2668.43	33.6278	2677.51	16.6277	2677.51	16.6277
Cf	13662.1	210.297	1.34288	12.9022	1.54604	0.512853	1.33684	2646.86	15.8875	2606.16	29.5536	2678.11	16.1485	2678.11	16.1485
Cf	153167	67.1732	0.975646	12.9795	1.55908	0.515898	1.17029	2709.22	15.0066	2751.08	26.963	2678.14	17.1295	2678.14	17.1295
Cf	34577.8	215.196	1.56414	13.0979	1.78	0.520534	1.48865	2664.07	18.1381	2645.28	35.2859	2678.35	17.0662	2678.35	17.0662
Cf	9079.9	51.1807	1.24856	12.783	1.5712	0.507928	1.35447	2681.48	16.6902	2684.28	30.7546	2679.36	17.8932	2679.36	17.8932
Cf	1.03658e+07	178.488	1.22861	13.0981	1.48318	0.520019	1.13835	2690.13	16.293	2704.1	33.5232	2679.63	13.6106	2679.63	13.6106
Cf	162236	215.754	1.68011	12.9169	1.83804	0.512767	1.53896	2652.4	18.0664	2616.56	33.6682	2679.84	18.3869	2679.84	18.3869
Cf	32648.5	161.228	0.790978	12.555	1.68917	0.498224	1.37861	2502.25	17.0577	2288.8	28.2057	2680.31	18.3253	2680.31	18.3253
Cf	38753.1	269.311	0.771324	13.4137	1.58798	0.532286	1.20404	2693.24	14.6274	2710.41	30.1142	2680.37	12.2597	2680.37	12.2597
Cf	33295.5	138.904	1.53596	12.7867	1.92583	0.507344	1.62626	2643.12	16.9242	2594.33	32.1503	2680.69	16.3218	2680.69	16.3218
Cf	79992.2	468.762	8.32749	13.0252	1.76977	0.516491	1.40077	2680.38	12.1181	2679.36	22.294	2681.14	12.9952	2681.14	12.9952
Cf	60719.5	137.219	2.1878	13.1451	1.72653	0.52116	1.51784	2662.86	17.2086	2637.79	35.6455	2681.95	13.1031	2681.95	13.1031
Cf	160386	167.257	1.4173	12.6292	1.91995	0.500643	1.56548	2684.74	17.1563	2688.36	35.0337	2682.02	14.492	2682.02	14.492
Cf	142112	130.757	0.925836	10.7557	1.83594	0.426251	1.46402	2677.38	13.5913	2667.79	20.9127	2684.62	17.8242	2684.62	17.8242
Cf	20263.7	125.206	1.72957	13.1886	1.54971	0.522651	1.36094	2677.19	16.308	2666.62	32.8024	2685.18	14.1856	2685.18	14.1856
Cf	137691	87.784	1.70385	12.5053	1.7999	0.495476	1.50529	2678	17.1676	2668	35.3413	2685.56	13.821	2685.56	13.821
Cf	51400.8	150.517	1.06163	13.01	1.28512	0.515333	1.01692	2669.38	17.8597	2648.04	35.2865	2685.57	16.1359	2685.57	16.1359
Cf	303827	201.915	2.76461	12.7704	1.82732	0.505593	1.6466	2670.31	17.5723	2648.73	37.1769	2686.68	12.2382	2686.68	12.2382
Cf	28192.5	79.1957	1.44846	13.0704	1.81874	0.51745	1.59371	2663.74	14.3578	2632.98	25.9738	2687.17	15.51	2687.17	15.51
Cf	15218.7	137.043	1.5182	12.9687	1.44167	0.512616	0.957254	2682.9	18.8264	2675.73	37.5476	2688.29	16.8916	2688.29	16.8916
Cf	73175.9	154.992	1.57454	12.9661	1.72982	0.512342	1.50201	2681.61	17.3462	2671.97	35.2098	2688.87	14.7093	2688.87	14.7093
Cf	38605.1	60.8372	0.966188	12.9773	1.82086	0.512665	1.61759	2649.32	16.7108	2596.06	28.2552	2690.23	19.6042	2690.23	19.6042
Cf	81870.6	203.782	1.32359	12.859	1.8955	0.507989	1.62491	2695.91	14.2781	2703.12	26.5624	2690.49	15.1458	2690.49	15.1458
Cf	57550.4	274.935	2.88369	12.8718	1.86487	0.508151	1.7116	2674.53	18.3726	2652.73	34.6888	2691.04	18.5112	2691.04	18.5112
Cf	39050.3	66.7144	1.45418	12.7822	1.52455	0.50447	1.20161	2672.31	16.4866	2647.08	32.3488	2691.45	15.1447	2691.45	15.1447
Cf	18122.8	135.845	3.71574	13.0449	1.99603	0.514481	1.71456	2715.84	14.5227	2748.56	27.1344	2691.57	15.58	2691.57	15.58
Cf	32091.6	169.844	3.11913	13.027	1.83931	0.513598	1.60964	2657.15	15.8311	2610.95	31.7189	2692.49	13.2765	2692.49	13.2765
Cf	35229.7	157.971	1.59032	12.5879	1.77634	0.495879	1.3222	2647.63	14.8148	2589.07	27.7792	2692.67	14.624	2692.67	14.624
Cf	24006.4	204.143	1.89376	13.2259	1.51239	0.52093	1.20303	2666.28	13.721	2629.03	26.3321	2694.65	13.1549	2694.65	13.1549
Cf	41404.2	396.268	1.67995	12.9296	1.94916	0.509087	1.5951	2672.06	17.0909	2641.97	35.3236	2694.89	13.1441	2694.89	13.1441
Cf	1.95629e+06	519.02	2.55766	12.8991	1.7494	0.507764	1.49007	2687.67	14.1902	2676.95	27.0715	2695.73	14.1602	2695.73	14.1602
Cf	34072.6	118.157	1.52737	13.5079	1.53605	0.531688	1.21259	2676.02	14.9394	2649.21	29.7604	2696.32	13.1591	2696.32	13.1591
Cf	46199.4	242.929	2.36332	12.6931	1.68182	0.499337	1.47741	2675.24	15.2941	2646.92	29.7802	2696.7	14.309	2696.7	14.309
Cf	24219.9	142.029	1.61677	12.5653	1.57504	0.494257	1.30278	2680.46	14.7153	2656.51	26.1401	2698.57	16.4606	2698.57	16.4606
Cf	460956	206.662	1.79343	12.8169	1.45665	0.50355	1.21966	2671.87	15.9829	2636.03	31.3996	2699.1	14.492	2699.1	14.492
Cf	22478	102.379	0.841231	12.8957	1.81355	0.506571	1.62964	2684.35	17.0694	2664.54	31.3978	2699.3	18.1256	2699.3	18.1256
Cf	31646.4	186.159	0.941473	13.111	1.50402	0.514766	1.23574	2659.01	17.6001	2606.23	32.7806	2699.38	17.7582	2699.38	17.7582
Cf	31165.2	239.763	1.73039	12.95	1.58481	0.508264	1.36995	2703.59	17.5652	2704.55	33.263	2702.86	18.0064	2702.86	18.0064
Cf	28880.7	84.0815	1.59344	12.9393	1.62253	0.507727	1.37183	2641.78	17.0586	2562.27	30.564	2703.24	18.0989	2703.24	18.0989
Cf	350951	131.499	1.32108	13.0112	1.56051	0.509973	1.20063	2691.98	15.9288	2676.06	31.6999	2703.94	14.3288	2703.94	14.3288
Cf	60448.8	228.026	1.68459	12.8931	1.69602	0.505183	1.45125	2669.86	16.4421	2621.93	31.5036	2706.35	15.7131	2706.35	15.7131
Cf	14820.6	117.828	1.04163	13.065	1.80958	0.511854	1.43861	2659.51	20.325	2595.41	38.915	2708.62	19.1197	2708.62	19.1197
Cf	23295.1	71.7767	1.46857	12.7182	1.86945	0.498241	1.5291	2709.32	16.3394	2706.31	32.9026	2711.56	14.5032	2711.56	14.5032
Cf	44384.9	312.19	1.15598	13.3339	1.85946	0.521267	1.50586	2676.37	17.3061	2628.59	32.1506	2712.66	17.7024	2712.66	17.7024
Cf	36081.4	185.807	2.44048	12.4874	1.81438	0.488058	1.44556	2737.23	17.9682	2712.25	34.0994	2755.69	18.2073	2755.69	18.2073
Cf	90411	330.253	0.570212	13.171	1.68771	0.514558	1.4474	2734.17	15.8533	2673.07	30.0762	2779.61	15.6756	2779.61	15.6756
Cf	124609	159.33	8.30463	12.8656	1.74501	0.501895	1.4624	2633.78	21.6564	2448.21	27.517	2779.64	30.6097	2779.64	30.6097
Cf	73130.5	253.012	0.998639	12.725	2.15872	0.495728	1.82139	2785.46	14.6407	2792.26	29.122	2780.53	13.9352	2780.53	13.9352
Cf	99508.5	546.641	1.79247	13.4151	1.72899	0.521682	1.48876	2759.83	18.632	2704.21	38.5238	2800.75	14.7867	2800.75	14.7867
Cf	53096.7	245.59	1.22654	12.9548	1.83578	0.503446	1.48937	2784.05	13.4974	2760.62	23.9924	2801.06	15.3225	2801.06	15.3225
Cf	28838.7	322.317	1.35564	13.8167	1.89748	0.523085	1.5402	2792.6	15.923	2780.14	31.9036	2801.6	14.7256	2801.6	14.7256
Cf	25453.4	97.2737	1.0636	13.7722	1.67454	0.513856	1.3745	2770.24	16.5688	2725.97	31.7927	2802.64	16.3745	2802.64	16.3745
Cf	28738.9	166.985	0.952634	12.3816	2.30474	0.461961	1.35086	2810.23	15.7865	2813.71	33.0056	2807.73	13.2443	2807.73	13.2443
Cf	27290.1	156.917	1.3909	14.5376	1.54096	0.542107	1.28508	2833.83	15.1441	2834.09	30.7231	2833.63	13.9299	2833.63	13.9299
Cf	43485.6	175.037	0.993407	14.1502	1.96443	0.521186	1.74419	2823.52	17.4825	2803.79	36.7803	2837.62	14.1347	2837.62	14.1347
Cf	504018	511.474	39.0897	14.516	1.42078	0.534555	1.06842	2825.54	15.8673	2804.29	31.2412	2840.72	15.3482	2840.72	15.3482
Cf	60676.1	150.704	1.09257	14.6472	1.6751	0.539209	1.41273	2832	17.4804	2805.42	33.8036	2850.96	17.5098	2850.96	17.5098
Cf	54257.8	263.315	0.954844	14.3065	1.74568	0.52633	1.4302	2854.5	16.3952	2858.04	31.6754	2851.99	16.8343	2851.99	16.8343
Cf	30345.4	182.483	0.924047	14.9213	1.65879	0.547246	1.44758	2862.38	14.6278	2873.32	30.037	2854.68	13.3098	2854.68	13.3098
Cf	45291.1	278.633	3.62472	15.2956	1.58886	0.552145	1.33975	2875.84	16.2226	2904.99	32.8274	2855.48	15.5408	2855.48	15.5408
Cf	90744.5	329.169	4.06238	15.131	1.83537	0.544866	1.61768	2870.46	16.1732	2886.58	34.448	2859.15	13.3637	2859.15	13.3637
Cf	20456.3	222.858	1.38278	15.1631	1.66561	0.544986	1.37387	2838.08	17.798	2807.61	35.5767	2859.78	16.6097	2859.78	16.6097
Cf	1.80512e+06	390.676	1.51914	15.2663	1.83414	0.545258	1.48607	2848.44	15.0913	2825.63	31.2383	2864.61	12.9911	2864.61	12.9911
Cf	75377.5	203.082	2.36318	15.6308	1.71783	0.557922	1.37206	2873.03	18.5995	2880.75	38.0715	2867.61	17.0784	2867.61	17.0784
Cf	61642.5	141.545	1.10334	15.7603	1.53192	0.56162	1.29559	2842.49	17.4713	2806.04	37.1204	2868.43	13.5467	2868.43	13.5467
Cf	34830.1	250.254	10.5226	15.984	1.6975	0.569311	1.4037	2866.51	15.9011	2860.7	29.9288	2870.58	16.9982	2870.58	16.9982
Cf	36916.8	241.5	0.86645	15.8942	1.69289	0.564835	1.48043	2851.21	16.142	2821.75	34.8562	2872.09	11.8899	2872.09	11.8899
Cf	528938	416.457	3.09828	15.364	1.86673	0.545783	1.56304	2866.92	21.3066	2858.93	43.6635	2872.52	19.2319	2872.52	19.2319
Cf	188754	440.23	2.47951	15.5318	1.58184	0.55011	1.36546	2874.43	15.0444	2866.12	29.3149	2880.24	15.1787	2880.24	15.1787
Cf	54438.5	305.714	2.28047	15.9371	1.94649	0.563422	1.63878	2867.92	12.9399	2850.17	24.1797	2880.4	13.9084	2880.4	13.9084
Cf	37110	339.017	2.46136	15.4352	1.83195	0.545406	1.6316	2883.88	19.2662	2883.45	39.2173	2884.17	17.8927	2884.17	17.8927
Cf	33686.3	287.889	0.817703	15.8286	1.66482	0.558567	1.29544	2853.59	18.9674	2808.14	37.8103	2885.84	17.717	2885.84	17.717
Cf	946891	358.656	2.53408	15.577	1.69166	0.549176	1.52527	2892.41	18.8293	2901.04	40.6375	2886.39	14.9468	2886.39	14.9468
Cf	46357.2	299.523	0.792541	15.8354	2.23056	0.558139	1.89085	2880.69	16.4087	2871.27	31.1231	2887.28	17.3462	2887.28	17.3462
Cf	69287	330.49	2.95947	15.9604	1.57437	0.559878	1.26696	2899.07	16.8841	2914.9	37.1212	2888.08	12.6386	2888.08	12.6386
Cf	238145	516.278	7.91056	15.852	1.35471	0.556022	1.04967	2887.9	16.2051	2883.68	32.3464	2890.83	15.6947	2890.83	15.6947
Cf	182176	349.573	3.35126	16.119	2.01491	0.564076	1.68684	2890.52	18.6482	2889.09	37.1327	2891.5	18.1954	2891.5	18.1954
Cf	135049	494.692	1.74963	15.6159	1.98739	0.545909	1.66093	2874.4	16.9349	2846.22	34.4471	2894.2	15.3846	2894.2	15.3846
Cf	57193.2	177.384	2.90312	16.2634	1.9682	0.568349	1.73952	2855.23	15.9095	2796.97	31.4675	2896.58	15.0008	2896.58	15.0008
Cf	200239	197.453	1.99307	16.0654	1.71645	0.561122	1.3432	2894.3	15.4443	2887.51	30.2992	2899.01	15.4811	2899.01	15.4811
Cf	42044.2	142.094	1.42082	16.377	1.76421	0.571726	1.58303	2909.51	12.9716	2920.75	25.3173	2901.73	13.3017	2901.73	13.3017
Cf	86822.5	356.267	3.75821	16.1869	1.69441	0.564132	1.39122	2886.47	13.9644	2862.5	29.2407	2903.22	11.8266	2903.22	11.8266
Cf	51723.5	381.387	3.63191	16.2313	1.9495	0.565444	1.59471	2885.51	15.9037	2852.9	31.623	2908.33	15.2395	2908.33	15.2395
Cf	130701	356.339	2.29165	15.96	1.77217	0.555069	1.49704	2878.06	17.4672	2834.57	36.7616	2908.63	14.224	2908.63	14.224
Cf	39645	170.967	1.00192	15.6427	1.66687	0.543234	1.38671	2782.91	16.1485	2608.15	29.193	2912.17	16.5017	2912.17	16.5017
Cf	56513.6	434.584	3.34096	16.2956	1.61424	0.565062	1.3018	2896.86	18.1137	2874.75	35.8175	2912.25	17.7327	2912.25	17.7327
Cf	102082	391.039	2.45594	16.5567	1.3546	0.573153	1.07794	2866.44	15.9532	2799.95	31.4715	2913.49	15.1052	2913.49	15.1052
Cf	2.89047e+06	345.504	2.6612	16.1626	1.46029	0.559001	1.26503	2906.64	17.3164	2893.27	33.9562	2915.91	17.3598	2915.91	17.3598
Cf	35430.5	145.865	4.71055	16.1465	1.66314	0.556682	1.37175	2920.47	15.2239	2920.15	26.7681	2920.69	17.9104	2920.69	17.9104
Cf	92300.4	645.685	2.50166	16.0212	1.82746	0.552261	1.60285	2897.13	18.7915	2859.09	38.6315	2923.66	16.6389	2923.66	16.6389
Cf	185007	240.506	3.4159	14.4986	1.69994	0.498686	1.36095	2926.76	18.6881	2928.48	38.911	2925.57	16.711	2925.57	16.711
Cf	37293.3	235.824	2.48735	16.3392	1.89291	0.561966	1.54431	2905.09	16.176	2875.32	32.4216	2925.77	15.3575	2925.77	15.3575
Cf	21311.9	203.189	2.95253	15.8274	1.67028	0.543947	1.38571	2905.54	17.4799	2874.36	37.6343	2927.21	13.5297	2927.21	13.5297
Cf	57864.3	229.12	4.21948	16.5071	1.80855	0.566459	1.45662	2929.35	19.7535	2927.88	42.2546	2930.35	16.3347	2930.35	16.3347
Cf	39397.9	167.858	3.20401	16.7472	1.58874	0.573006	1.13991	2945.47	15.0295	2960.28	27.0649	2935.36	17.355	2935.36	17.355
Cf	125462	279.338	2.21095	16.3438	1.96369	0.558177	1.67288	2920.97	13.1002	2889.23	24.0072	2942.9	14.5014	2942.9	14.5014
Cf	35658.7	231.873	2.11061	16.8575	1.94946	0.575041	1.65326	2949.91	17.157	2959.5	36.0892	2943.36	15.1715	2943.36	15.1715
Cf	404554	198.587	2.90394	16.4803	1.68962	0.562105	1.39767	2960.29	15.8784	2982.87	32.2004	2944.98	15.4469	2944.98	15.4469
Cf	51451.4	152.843	2.55256	16.4881	1.82573	0.561873	1.62281	2940.9	16.6893	2933.64	34.7119	2945.86	14.9488	2945.86	14.9488
Cf	30286.9	61.5115	5.36107	16.903	2.06026	0.574894	1.79562	2914.9	21.8913	2869.84	46.5191	2946.15	17.6004	2946.15	17.6004
Cf	36204.2	163.986	2.13249	17.1895	1.56617	0.582827	1.1402	2985.96	17.1959	3042.06	34.7215	2948.38	17.2866	2948.38	17.2866
Cf	137785	286.414	5.98257	16.7559	1.36709	0.565479	1.03098	2923.82	16.1114	2887.6	34.0672	2948.83	13.3506	2948.83	13.3506
Cf	37241.9	129.327	1.0422	17.2693	1.78738	0.582637	1.52068	2916.96	15.3786	2870.53	32.7589	2949.14	12.267	2949.14	12.267
Cf	9768.15	331.515	3.60396	17.457	1.65322	0.588385	1.34845	2893.1	19.3229	2812.05	38.8048	2950	17.5357	2950	17.5357
Cf	61896.1	159.292	3.02143	17.1079	1.73957	0.576301	1.47281	2928.44	17.4272	2897	33.1882	2950.11	18.2754	2950.11	18.2754
Cf	60615.5	264.365	1.47738	16.65	2.28509	0.560777	2.00843	2938.47	16.8829	2919.96	35.9087	2951.16	14.0664	2951.16	14.0664
Cf	63161.9	119.629	2.11041	17.9296	1.78783	0.603037	1.43178	2960.79	13.4263	2973.9	26.2795	2951.88	13.8626	2951.88	13.8626
Cf	26930.2	94.8822	2.67343	16.8058	1.681	0.565084	1.46365	2950.25	15.8998	2945.29	30.0344	2953.62	17.1579	2953.62	17.1579
Cf	222469	171.917	2.13486	16.6859	1.60521	0.560945	1.41408	2925.7	18.1797	2885.21	37.0731	2953.66	16.592	2953.66	16.592
Cf	50666.8	46.4249	3.64538	16.2751	2.0197	0.546847	1.70272	2926.88	16.6263	2887.49	34.1338	2954.06	14.9458	2954.06	14.9458
Cf	29945.1	122.116	1.34092	16.887	1.81777	0.567366	1.42223	2977.19	16.606	3011.29	37.2711	2954.22	12.3313	2954.22	12.3313
Cf	77983.4	242.341	2.38836	17.0646	1.75999	0.57296	1.52922	2952.65	15.2698	2946.67	31.5	2956.71	14.0315	2956.71	14.0315
Cf	30408	150.335	1.38442	17.466	1.39792	0.586177	1.10311	2928.16	15.5642	2884.7	32.4595	2958.16	13.3818	2958.16	13.3818
Cf	1.31836e+06	165.041	2.00401	17.2754	1.6564	0.579152	1.27036	2944.3	16.2806	2921.81	32.5867	2959.7	15.7633	2959.7	15.7633
Cf	23868	143.895	1.52306	16.8387	1.89655	0.564502	1.59385	2936.08	13.8306	2893.18	24.6664	2965.61	15.7974	2965.61	15.7974
Cf	56753.6	139.399	2.49484	16.8595	1.73441	0.565055	1.46656	2954.58	18.6766	2936.85	39.2815	2966.67	16.208	2966.67	16.208
Cf	94435.6	261.559	1.44214	17.7667	1.72733	0.595403	1.5492	2966.93	17.8822	2966.56	38.7518	2967.17	14.4881	2967.17	14.4881
Cf	93039.4	549.919	3.39425	17.3186	1.59056	0.579491	1.33186	2948.05	17.8995	2917.28	37.6882	2969.11	15.2766	2969.11	15.2766
Cf	28001	158.275	0.97386	16.8821	1.62351	0.564379	1.3957	2957.54	18.475	2939.3	38.2663	2969.96	16.6968	2969.96	16.6968
Cf	130654	410.664	4.9652	17.1686	1.69664	0.57341	1.38706	2939.08	12.4301	2893.14	23.12	2970.68	13.4406	2970.68	13.4406
Cf	22428.5	81.6389	1.73742	17.0222	1.44203	0.566439	1.05814	2982.33	17.4145	2998	38.1288	2971.78	13.9579	2971.78	13.9579
Cf	198503	147.223	2.04885	17.3535	1.94514	0.577085	1.66525	3025.73	15.3821	3102.03	31.9612	2975.42	14.9533	2975.42	14.9533
Cf	31001.6	152.122	3.00899	17.5781	1.86113	0.584372	1.62981	2970.27	16.889	2961.1	34.5594	2976.48	15.8609	2976.48	15.8609
Cf	254737	112.384	2.08482	17.2358	1.86491	0.572304	1.60617	2987.84	15.5603	3001.82	30.4337	2978.44	16.1721	2978.44	16.1721
Cf	6750.72	215.813	1.64605	17.407	1.92383	0.577686	1.62115	2820.01	28.2335	2515.44	59.2285	3045.61	13.3972	3045.61	13.3972
Cf	82210.1	176.87	1.01127	17.0755	1.29581	0.566428	0.991823	2958.1	16.6897	2809.19	31.0216	3060.99	17.2606	3060.99	17.2606
Cf	31777.1	146.599	1.59632	17.862	1.81091	0.592116	1.59037	2962.65	16.0067	2786.34	32.0113	3084.64	14.0454	3084.64	14.0454
Cf	34711.3	93.1495	0.834381	18.6856	1.59586	0.618019	1.29803	3092.43	20.1571	3097.91	39.2536	3088.87	21.3862	3088.87	21.3862
Cf	65518.8	180.528	1.14535	17.6393	1.75745	0.583029	1.4556	2999.97	18.4374	2830.06	37.7449	3115.88	15.5491	3115.88	15.5491
Cf	24422.4	174.592	0.877962	17.9646	1.61764	0.593061	1.26814	3090.98	23.9799	3044.27	38.3699	3121.46	30.3903	3121.46	30.3903
Cf	155309	203.274	1.01848	15.0753	2.96426	0.477288	2.84371	3090.64	16.8885	3032.75	37.726	3128.46	12.5037	3128.46	12.5037
Cf	282853	199.298	1.8998	17.4173	1.7379	0.546161	1.36231	3178.67	17.0026	3234.35	33.1163	3143.7	18.5901	3143.7	18.5901
Cf	95928.5	205.5	1.23254	17.5	1.66636	0.540692	1.41497	3162.17	16.5544	3126.52	36.1783	3184.86	13.9647	3184.86	13.9647
Cf	43011.7	473.948	1015.75	20.0222	2.08405	0.616984	1.59583	3197.83	15.3792	3215.18	34.3902	3186.96	12.8472	3186.96	12.8472
Cf	102358	350.172	1.30696	18.1925	1.91541	0.551176	1.64781	3111.75	15.7661	2985.38	32.6189	3194.33	14.0538	3194.33	14.0538
Cf	75819.3	252.522	1.07795	19.9922	2.47933	0.603585	1.58133	3167.24	13.0873	3115.84	26.4284	3199.96	12.9847	3199.96	12.9847
Cf	31126.7	159.662	3.3685	19.9852	1.74633	0.600723	1.55941	3122.43	18.0524	3001.5	36.3575	3201.12	17.1598	3201.12	17.1598
Cf	34574.2	191.679	1.40981	21.8857	1.75085	0.651573	1.30213	3175.55	17.8948	3122.84	42.3462	3209.03	10.8239	3209.03	10.8239
Cf	57991.6	204.221	0.799802	21.5167	1.70598	0.624176	1.46033	3200.22	15.9974	3185.89	30.3952	3209.22	17.6399	3209.22	17.6399
Cf	551283	486.2	36.5561	22.3217	1.58235	0.64667	1.35843	3134.63	14.6942	3015.85	27.7403	3211.59	15.5781	3211.59	15.5781
Cf	36953.7	143.255	4.37839	20.4261	1.62862	0.589002	1.36507	3233.84	13.6153	3268.92	29.905	3212.15	12.1945	3212.15	12.1945
Cf	186644	158.156	0.835528	21.6296	1.34841	0.62149	1.06962	3180.06	15.2059	3122.91	32.7806	3216.3	13.1881	3216.3	13.1881
Cf	21757.2	119.879	0.832634	20.6526	1.86378	0.592981	1.5151	3194.2	16.3254	3150.57	36.2959	3221.7	13.2161	3221.7	13.2161
Cf	30225.8	153.475	1.63145	21.8156	1.84297	0.62325	1.71085	3167.91	16.1251	3083.35	32.6238	3221.91	15.6877	3221.91	15.6877
Cf	134628	406.756	3.56165	22.3767	1.64577	0.639203	1.20914	3184.69	16.791	3122.65	37.5082	3224	13.1211	3224	13.1211
Cf	1.01528e+06	192.946	1.5548	20.9143	1.51624	0.596533	1.15169	3224.06	17.8868	3220.58	39.3084	3226.22	15.5747	3226.22	15.5747
Cf	90742.1	280.967	1.68932	23.1636	1.39871	0.660453	1.16629	3235.72	14.0351	3249.62	31.8741	3227.1	11.3712	3227.1	11.3712
Cf	18277.7	49.8602	2.99051	21.917	1.56577	0.623269	1.32437	3223.45	19.678	3213.92	45.0775	3229.37	15.1131	3229.37	15.1131
Cf	355948	156.465	0.970999	22.2384	1.67996	0.630247	1.45639	3194.58	14.8817	3135.54	31.9088	3231.87	13.1389	3231.87	13.1389
Cf	90683.6	156.073	1.49128	21.6446	1.66132	0.613338	1.33119	3241.05	17.95	3254.09	38.8032	3232.98	16.4832	3232.98	16.4832
Cf	22963.8	366.894	1.0786	22.0219	1.72859	0.623203	1.51546	3124.64	16.2288	2955.98	32.3109	3234.85	15.3706	3234.85	15.3706
Cf	413162	145.03	0.905585	22.9321	1.83821	0.64805	1.55068	3251.89	15.9988	3278.93	35.0365	3235.25	14.4441	3235.25	14.4441
Cf	37778.5	235.506	0.858967	23.2084	1.44171	0.655491	1.24875	3225.6	16.8135	3208.11	34.6689	3236.49	16.5669	3236.49	16.5669
Cf	178896	272.473	1.35616	22.9176	2.0223	0.646348	1.78111	3234.05	18.8171	3227.51	44.4167	3238.09	12.9673	3238.09	12.9673
Cf	126343	503.045	3.19688	22.2472	1.53139	0.626451	1.28512	3221.64	16.6143	3189.16	36.7008	3241.91	13.9917	3241.91	13.9917
Cf	451188	268.435	1.58127	23.3358	1.84337	0.65664	1.51861	3249.51	16.1601	3260.16	35.0432	3242.93	14.7586	3242.93	14.7586
Cf	30942.2	166.449	1.05556	20.6998	1.67536	0.581773	1.36276	3224.42	16.8583	3192.82	36.5046	3244.12	14.9502	3244.12	14.9502
Cf	263634	155.232	0.772059	23.597	1.64228	0.663034	1.36321	3235.4	16.1671	3220.54	36.3454	3244.62	13.2054	3244.62	13.2054
Cf	34111.4	139.868	1.19418	22.9684	1.72781	0.644864	1.37177	3238.02	14.8605	3226.5	30.7607	3245.16	14.6253	3245.16	14.6253
Cf	167380	180.243	1.00588	23.1685	1.93297	0.649822	1.7493	3198.68	14.9778	3124.7	33.0482	3245.4	12.1407	3245.4	12.1407
Cf	32083.9	183.354	1.87378	22.8749	1.70764	0.640037	1.45882	3244.02	17.4851	3241.27	34.4783	3245.71	18.59	3245.71	18.59
Cf	28186.6	116.103	0.61838	23.5394	1.659	0.6582	1.3695	3245.69	14.0645	3245.57	29.6287	3245.75	13.5144	3245.75	13.5144
Cf	1.3314e+06	90.8913	1.56763	22.9404	1.7325	0.640968	1.44973	3227.41	16.7392	3196.31	35.9039	3246.78	15.186	3246.78	15.186
Cf	31255.6	192.291	1.09669	23.2008	1.66071	0.64804	1.43381	3243.21	16.395	3237.36	35.0018	3246.82	15.3008	3246.82	15.3008
Cf	100621	180.865	1.34697	23.2634	1.52634	0.649563	1.21178	3210.16	12.2931	3151.76	25.9077	3246.84	11.3414	3246.84	11.3414
Cf	122866	209.601	1.71966	22.3412	1.541	0.623719	1.33459	3188.43	15.0672	3095.48	32.0187	3247.44	13.2648	3247.44	13.2648
Cf	563917	151.336	1.19686	23.4071	1.79541	0.653348	1.35345	3244.54	15.4504	3239.74	31.6664	3247.5	15.5224	3247.5	15.5224
Cf	38658.7	97.0539	0.681441	23.4472	1.44413	0.654451	1.1619	3218.33	19.6611	3170.39	41.6741	3248.33	18.0691	3248.33	18.0691
Cf	522280	249.731	1.82734	23.011	1.72005	0.641857	1.42468	3242.05	17.5844	3231.75	38.3624	3248.41	15.6176	3248.41	15.6176
Cf	23629.8	365.919	1.64162	23.3876	1.68355	0.652346	1.37528	3226.93	18.2717	3191.48	42.1804	3249.03	13.3417	3249.03	13.3417
Cf	22920.1	57.802	0.737157	22.6065	1.26418	0.630549	1.03926	3251.84	15.406	3251.81	34.7045	3251.85	12.7398	3251.85	12.7398
Cf	49288.9	163.507	1.29838	22.1067	1.5509	0.616376	1.3025	3256.29	17.4187	3262.1	39.3814	3252.7	14.3428	3252.7	14.3428
Cf	36134.3	147.365	1.09993	23.4197	1.58648	0.652956	1.24352	3259.16	16.6472	3266.4	39.4665	3254.69	11.64	3254.69	11.64
Cf	161152	141.178	1.21776	22.7973	2.02101	0.635268	1.66408	3251.25	20.5787	3245.61	46.2463	3254.72	17.0557	3254.72	17.0557
Cf	39892.1	626.964	4.8906	23.3597	1.80575	0.650909	1.50934	3030.04	29.2896	2702.89	60.8192	3254.83	20.147	3254.83	20.147
Cf	68427	110.018	1.17576	22.9998	1.87753	0.640627	1.67568	3251.03	14.9423	3244.84	33.136	3254.84	12.8287	3254.84	12.8287
Cf	45222.8	128.281	1.15837	23.5958	1.58144	0.656054	1.35894	3247.36	14.7303	3230.46	30.7349	3257.8	14.2914	3257.8	14.2914
Cf	209446	129.045	0.886103	23.7037	1.78768	0.658699	1.53832	3237.08	17.4178	3203.12	38.1668	3258.19	15.0545	3258.19	15.0545
Cf	115660	193.273	1.13145	23.7737	1.7083	0.659806	1.54009	3250.5	17.9206	3235.93	39.6462	3259.5	15.3849	3259.5	15.3849
Cf	463431	228.687	1.22248	23.5814	2.11235	0.65446	1.81353	3230.62	17.57	3182.71	40.3562	3260.49	12.9534	3260.49	12.9534
Cf	241796	332.085	2.3044	18.7694	3.03742	0.520875	2.75467	3228.59	16.0427	3177.4	35.2966	3260.54	13.5118	3260.54	13.5118
Cf	45262.2	278.934	0.917601	23.5761	1.5339	0.654262	1.29966	3252.79	12.3334	3238.85	27.0296	3261.4	10.8544	3261.4	10.8544
Cf	31659.9	198.827	1.04421	23.4874	1.51238	0.650577	1.20962	3247.38	17.0426	3222.09	37.2582	3263.03	14.9471	3263.03	14.9471
Cf	50446.7	181.869	0.695365	23.2409	1.78902	0.643592	1.51198	3221.2	14.423	3152.15	28.2787	3264.47	15.0147	3264.47	15.0147
Cf	122635	359.488	1.61488	23.5634	1.83962	0.651977	1.55829	3192.09	15.6553	3077.47	33.9516	3264.94	12.8826	3264.94	12.8826
Cf	72966.8	177.088	2.02723	23.0871	1.80515	0.638396	1.60663	3242.51	18.0632	3205.56	37.8152	3265.44	17.2238	3265.44	17.2238
Cf	47626.7	233.913	0.612232	23.039	1.64841	0.637048	1.40702	3241.49	15.1232	3199.95	31.8533	3267.28	14.2171	3267.28	14.2171
Cf	418248	259.902	4.01318	23.6189	1.26602	0.652727	1.06167	3237.06	19.538	3188.11	44.5475	3267.53	14.8359	3267.53	14.8359
Cf	31922.6	214.774	1.16764	23.488	1.74974	0.648435	1.46928	3256.15	16.4663	3237.37	36.125	3267.74	14.4231	3267.74	14.4231
Cf	52034.3	549.174	1.31475	22.8647	1.48247	0.630649	1.13426	3223.15	15.4753	3149.43	35.1141	3269.34	11.5889	3269.34	11.5889
Cf	1.95468e+06	197.79	1.1557	22.1903	1.61117	0.611867	1.38743	3245.92	17.0341	3206.7	35.6044	3270.24	16.2862	3270.24	16.2862
Cf	32057.6	104.136	0.973845	23.3708	1.85488	0.644214	1.49717	3265.68	17.6224	3257.31	39.9189	3270.81	14.3356	3270.81	14.3356
Cf	32864.3	141.451	0.641565	23.3463	1.55309	0.642784	1.26284	3240.16	14.6438	3187.26	31.8426	3273.07	12.7536	3273.07	12.7536
Cf	198721	153.41	1.17552	23.2404	2.00675	0.639769	1.77116	3232.37	17.1783	3164.93	36.5124	3274.46	15.5846	3274.46	15.5846
Cf	66701.5	330.711	1.46804	23.7005	1.68996	0.652347	1.41941	3253.36	16.8158	3218.26	38.9641	3275.06	12.3128	3275.06	12.3128
Cf	206234	361.398	2.24213	22.9104	1.59049	0.629959	1.40937	3256.88	13.8966	3223.24	28.4652	3277.64	13.8309	3277.64	13.8309
Cf	74837.9	313.64	2.38248	23.4528	1.74897	0.644504	1.40926	3263.08	17.9755	3233.52	41.3794	3281.28	13.6331	3281.28	13.6331
Cf	113370	149.115	0.98371	23.9332	1.80788	0.657466	1.56108	3250.27	15.2106	3195.24	30.7788	3284.38	15.2752	3284.38	15.2752
Cf	37057.7	149.034	2.35902	23.3145	1.50394	0.639552	1.2663	3259.42	18.4085	3214.61	41.6565	3287.09	14.5626	3287.09	14.5626
Cf	47016.4	385.384	0.99954	23.1286	1.76478	0.633884	1.45992	3252.3	18.5199	3190.61	39.8501	3290.55	16.519	3290.55	16.519
Cf	145302	303.616	1.74434	23.6327	1.72602	0.647456	1.53796	3271.47	16.2013	3239.31	35.5054	3291.23	14.1928	3291.23	14.1928
Cf	141768	375.436	7.93653	23.7181	1.42622	0.648728	1.12222	3321.99	14.0787	3288.9	30.0168	3342	13.2598	3342	13.2598
Cf	360825	292.285	1.42356	23.8695	1.84429	0.65136	1.62735	3325.21	14.8056	3296.22	30.6846	3342.71	14.6869	3342.71	14.6869
Cf	91169.9	299.306	2.41643	23.5577	1.56149	0.641584	1.22163	3366.87	18.077	3358.74	40.665	3371.71	15.5995	3371.71	15.5995
Cf	67160.1	450.36	1.47285	23.7801	1.88899	0.646524	1.64567	3386.65	17.9449	3344.22	38.615	3411.84	16.8062	3411.84	16.8062
Cf	3188.31	905.47	6.92715	23.6069	1.90099	0.640405	1.58344	3260.44	30.7344	3019.74	69.0607	3411.99	20.51	3411.99	20.51
Cf	70971.4	265.154	2.20552	24.0759	1.66172	0.652844	1.39442	3392.31	16.3463	3358.62	37.4185	3412.26	13.4013	3412.26	13.4013
Cf	47196.9	1035.68	3.51961	25.3551	1.44113	0.665607	1.16519	3379.07	16.7245	3299.91	38.1084	3426.34	13.3796	3426.34	13.3796
Cf	36977.2	185.266	5.34355	25.4388	1.51534	0.667501	1.18909	3394.76	17.6804	3312.17	38.4917	3443.87	15.897	3443.87	15.897
Cf	283792	380.121	2.15214	26.5462	1.84719	0.683753	1.55337	3450.44	13.8289	3446.26	32.6447	3452.86	10.8488	3452.86	10.8488
Cf	54488	351.464	1.56011	27.0881	1.83236	0.679964	1.47995	3507.39	15.4694	3497.58	33.8528	3512.99	14.6615	3512.99	14.6615
Cf	115243	124.934	2.63684	23.805	3.15307	0.597495	2.86419	3522.39	20.5002	3500.33	49.6371	3534.95	15.1374	3534.95	15.1374
Cf	30700.1	171.181	4.41724	27.2451	1.66881	0.683719	1.4294	3555.62	14.8494	3502.61	33.7997	3585.61	12.9321	3585.61	12.9321
Cf	33966.7	232.894	2.63048	26.8791	1.70824	0.668456	1.4755	3545.89	16.9149	3432.37	38.241	3610.64	14.4461	3610.64	14.4461
Cf	67562	159.749	0.784829	27.3133	1.80483	0.671632	1.48612	3601.78	17.2641	3571.34	43.268	3618.75	11.6191	3618.75	11.6191
Cf	18432.5	537.51	7.86826	28.9092	1.40896	0.706768	1.22289	3503.94	20.7564	3182.03	46.8229	3693.47	14.9953	3693.47	14.9953
Cf	34536.1	168.37	0.629349	30.6346	1.57311	0.720409	1.25408	3732.54	15.4798	3778.37	37.4335	3708.03	13.0333	3708.03	13.0333
Cf	78047.7	547.167	2.73003	31.1055	2.08359	0.721144	1.8377	3676	18.787	3579.4	41.4491	3729.06	17.5878	3729.06	17.5878
Cf	425894	400.859	1.63842	32.1735	1.50779	0.721753	1.25076	3743.36	15.957	3520.05	38.8933	3865.14	11.1064	3865.14	11.1064
Cf	121579	94.0435	2.46111	31.8571	1.718	0.703093	1.43692	3882.22	14.6786	3883.1	34.8823	3881.77	13.0784	3881.77	13.0784
Cf	187879	430.182	2.42328	33.7166	1.75051	0.740207	1.57794	3849.03	18.681	3759.24	46.9514	3896.12	13.6668	3896.12	13.6668
Cf	45799.6	219.811	2.10294	30.5272	2.11086	0.638224	1.86437	3920.73	17.2027	3922.41	43.2705	3919.88	13.647	3919.88	13.647
Yla		657.611	46.4071	38.4879	1.56401	0.797002	1.30926	1765.47	13.9485	1765.72	22.342	1765.15	15.1213	1765.15	15.1213
Yla		286.151	3.32412	36.349	1.90092	0.742384	1.50906	1769.39	14.9887	1763.74	25.3171	1776.04	13.026	1776.04	13.026
Yla		316.475	10.1167	38.911	1.61178	0.726416	1.43387	1765.26	15.8719	1756	24.3984	1776.22	18.9354	1776.22	18.9354
Yla		131.209	2.87992	44.7599	1.47781	0.826436	1.19586	1784.12	13.0718	1786.97	20.0669	1780.77	15.9723	1780.77	15.9723
Yla		144.053	2.47186	43.288	1.88209	0.791676	1.6483	1811.06	13.4067	1837.1	21.0733	1781.2	16.1098	1781.2	16.1098
Yla		129.723	3.68433	46.5286	1.73046	0.837605	1.47258	1798.58	12.2658	1812.65	19.8547	1782.28	13.3944	1782.28	13.3944
Yla		260.734	3.15615	4.61028	1.92118	0.30664	1.57827	1751.13	16.0316	1724.15	23.8768	1783.47	19.971	1783.47	19.971
Yla		241.461	15.5777	4.90462	1.88708	0.326096	1.56359	1803.05	15.9173	1819.43	24.7864	1784.14	19.2599	1784.14	19.2599
Yla		198.594	3.96416	4.89762	1.60832	0.324938	1.4407	1801.85	13.5624	1813.8	22.7772	1788.03	13.025	1788.03	13.025
Yla		282.705	4.21361	4.74241	1.45898	0.314614	1.19303	1774.77	12.2351	1763.37	18.4056	1788.18	15.3014	1788.18	15.3014
Yla		79.4391	8.27805	4.67781	1.74789	0.310324	1.42012	1763.28	14.623	1742.3	21.681	1788.21	18.5666	1788.21	18.5666
Yla		218.554	6.81825	4.74149	1.43191	0.314523	1.09605	1774.6	12.0076	1762.93	16.9057	1788.35	16.7883	1788.35	16.7883
Yla		173.542	2.62059	4.71096	1.83069	0.312255	1.53224	1769.19	15.3348	1751.8	23.5038	1789.77	18.2499	1789.77	18.2499
Yla		138.896	3.98972	4.69433	1.52451	0.311141	1.26187	1766.23	12.7619	1746.32	19.3038	1789.84	15.5832	1789.84	15.5832
Yla		160.97	2.55832	4.77807	1.59026	0.316122	1.28933	1781.05	13.3535	1770.76	19.9638	1793.11	16.9506	1793.11	16.9506
Yla		121.254	4.51112	4.75901	1.66319	0.314572	1.41808	1777.7	13.9562	1763.17	21.8754	1794.79	15.8212	1794.79	15.8212
Yla		678.462	35.4049	4.71331	1.63002	0.311529	1.38448	1769.61	13.6549	1748.23	21.1996	1794.91	15.6622	1794.91	15.6622
Yla		328.411	8.45695	5.01704	1.63372	0.331457	1.34885	1822.2	13.8324	1845.44	21.6462	1795.73	16.7789	1795.73	16.7789
Yla		377.211	115.814	4.72581	1.64737	0.312136	1.43203	1771.83	13.8066	1751.21	21.9602	1796.2	14.8239	1796.2	14.8239
Yla		191.992	5.04913	4.78486	1.68953	0.315744	1.37255	1782.25	14.1906	1768.91	21.2331	1797.88	17.9291	1797.88	17.9291
Yla		151.702	2.44605	4.63936	1.63493	0.306021	1.46341	1756.38	13.6579	1721.1	22.1048	1798.61	13.2662	1798.61	13.2662
Yla		190.03	6.98582	4.82963	1.51166	0.318168	1.09406	1790.07	12.7168	1780.78	17.0234	1800.91	18.9765	1800.91	18.9765
Yla		221.894	3.74902	4.78755	1.59864	0.315348	1.20025	1782.72	13.4284	1766.97	18.5499	1801.18	19.209	1801.18	19.209
Yla		378.698	5.45013	4.79154	1.56852	0.315453	1.28331	1783.42	13.1773	1767.49	19.8386	1802.09	16.404	1802.09	16.404
Yla		133.105	2.57011	4.83008	1.69725	0.317952	1.36012	1790.15	14.2785	1779.72	21.1524	1802.31	18.4657	1802.31	18.4657
Yla		151.931	2.90059	4.98164	1.40933	0.32755	1.18452	1816.21	11.9183	1826.49	18.8402	1804.42	13.885	1804.42	13.885
Yla		131.161	4.34012	4.9039	1.52588	0.322309	1.22459	1802.93	12.8699	1801	19.242	1805.15	16.5514	1805.15	16.5514
Yla		81.095	3.71259	4.82444	1.3521	0.317033	1.14379	1789.17	11.3723	1775.22	17.7489	1805.45	13.1092	1805.45	13.1092
Yla		416.898	4.86221	4.87041	1.61422	0.319163	1.36024	1797.15	13.5992	1785.64	21.2153	1810.52	15.7926	1810.52	15.7926
Yla		151.155	3.48408	4.77242	1.81416	0.311941	1.5614	1780.06	15.2307	1750.25	23.9327	1815.18	16.774	1815.18	16.774
Yla		175.521	4.56852	4.83891	1.75378	0.316251	1.34328	1791.69	14.7588	1771.4	20.8055	1815.38	20.4759	1815.38	20.4759
Yla		288.955	5.69577	4.86039	1.35752	0.317394	1.12925	1795.42	11.4324	1776.99	17.5385	1816.88	13.6787	1816.88	13.6787
Yla		491.341	3.32052	4.66094	1.28182	0.303749	1.096	1760.26	10.7166	1709.87	16.4608	1820.58	12.0623	1820.58	12.0623
Yla		451.771	17.5141	5.01044	1.91455	0.326475	1.74901	1821.09	16.207	1821.27	27.7501	1820.86	14.1317	1820.86	14.1317
Yla		145.932	2.95286	4.78431	1.49745	0.311715	1.23922	1782.15	12.5769	1749.14	18.984	1821	15.2547	1821	15.2547
Yla		407.905	10.9949	4.9266	1.48384	0.32091	1.21727	1806.82	12.5251	1794.17	19.0641	1821.43	15.3974	1821.43	15.3974
Yla		586.462	7.64498	4.83936	1.97456	0.31461	1.78728	1791.77	16.6173	1763.35	27.5733	1824.99	15.2238	1824.99	15.2238
Yla		489.38	67.7195	4.7778	1.23716	0.310194	1.07314	1781.01	10.3881	1741.66	16.3785	1827.41	11.1614	1827.41	11.1614
Yla		138.769	4.23849	4.98525	1.77117	0.322504	1.42459	1816.82	14.9805	1801.95	22.3948	1833.91	19.0683	1833.91	19.0683
Yla		952.91	86.2786	4.87438	1.6471	0.314316	1.3547	1797.84	13.8782	1761.91	20.8847	1839.75	16.9624	1839.75	16.9624
Yla		145.174	3.32173	5.01977	1.54746	0.323279	1.31304	1822.66	13.1032	1805.72	20.6787	1842.06	14.8214	1842.06	14.8214
Yla		870.612	23.0001	4.91657	1.53331	0.31506	1.36399	1805.1	12.9382	1765.56	21.0658	1851.07	12.6632	1851.07	12.6632
Yla		704.845	51.6361	5.20392	1.86868	0.317865	1.3531	1853.26	15.9171	1779.29	21.0388	1937.29	23.0648	1937.29	23.0648
Yla		240.143	1.23817	4.6687	2.1063	0.280145	1.80805	1761.65	17.616	1592.09	25.5068	1969.06	19.2638	1969.06	19.2638
Yla		330.066	17.1587	5.35879	2.78386	0.321237	1.99494	1878.29	23.8259	1795.77	31.2677	1970.82	34.6123	1970.82	34.6123
Yla		246.039	2.19714	5.51936	1.98617	0.328201	1.80519	1903.62	17.0754	1829.65	28.7554	1985.21	14.7401	1985.21	14.7401
Yla		305.898	1.89822	6.11845	1.53394	0.360365	1.29277	1992.88	13.3881	1983.91	22.0765	2002.19	14.6629	2002.19	14.6629
Yla		623.224	22.5713	5.78573	2.624	0.340439	1.87274	1944.28	22.721	1888.78	30.6614	2003.91	32.6374	2003.91	32.6374
Yla		432.535	6.14189	6.63215	4.32917	0.347706	2.14669	2063.63	38.2162	1923.64	35.7034	2206.49	65.2727	2206.49	65.2727
Yla		76.6158	68.8167	9.45523	1.41484	0.445911	1.13692	2383.21	12.9927	2377.05	22.6026	2388.46	14.3361	2388.46	14.3361
Yla		1030.44	24.5083	7.89191	2.10798	0.363769	1.68401	2218.76	18.9992	2000.02	28.9569	2427.32	21.5013	2427.32	21.5013
Yla		168.74	1.89881	10.1059	1.42336	0.458939	1.17045	2444.51	13.1519	2434.87	23.7351	2452.52	13.7006	2452.52	13.7006
Yla		158.629	2.87205	10.1432	1.53863	0.459675	1.26618	2447.92	14.2219	2438.12	25.7046	2456.05	14.7792	2456.05	14.7792
Yla		449.122	6.16474	10.0604	1.4602	0.452235	1.256	2440.34	13.4869	2405.18	25.2138	2469.77	12.5732	2469.77	12.5732
Yla		139.884	3.52317	8.68142	3.63029	0.389633	1.40059	2305.13	33.0656	2121.12	25.3156	2472.43	56.5496	2472.43	56.5496
Yla		53.964	8.86908	10.7473	2.45573	0.481613	1.9765	2501.52	22.8163	2534.29	41.4175	2475.01	24.5959	2475.01	24.5959
Yla		315.953	25.077	9.34298	3.8058	0.41863	1.49149	2372.25	34.921	2254.26	28.3728	2475.22	59.104	2475.22	59.104
Yla		515.144	5.69744	10.3576	1.63345	0.461181	1.37672	2467.27	15.1266	2444.77	28.0113	2485.84	14.8212	2485.84	14.8212
Yla		504.086	5.78949	9.10252	1.93869	0.404683	1.69903	2348.36	17.7384	2190.56	31.5544	2488.4	15.7379	2488.4	15.7379
Yla		232.407	17.5419	9.09686	4.92859	0.397156	2.44365	2347.79	45.1173	2155.93	44.7796	2518.94	71.9491	2518.94	71.9491
Yla		149.614	7.19309	10.7752	2.84011	0.465174	1.44614	2503.93	26.3949	2462.36	29.5978	2537.8	40.9985	2537.8	40.9985
Yla		386.097	5.75427	10.9371	1.50569	0.470947	1.27835	2517.79	14.0087	2487.71	26.3843	2542.12	13.335	2542.12	13.335
Yla		1339.29	135.819	10.0347	1.94032	0.430145	1.7099	2437.98	17.9182	2306.37	33.1533	2549.69	15.3617	2549.69	15.3617
Yla		759.871	4.7134	10.3604	1.46436	0.440689	1.26063	2467.52	13.5608	2353.72	24.8582	2562.62	12.464	2562.62	12.464
Yla		928.265	50.0578	10.0471	1.47	0.416608	1.17614	2439.12	13.5758	2245.06	22.2974	2605.17	14.6907	2605.17	14.6907
Yla		1172.37	32.1865	11.964	1.85716	0.475675	1.33611	2601.59	17.4044	2508.4	27.7641	2674.95	21.3484	2674.95	21.3484
Yla		2542.87	21.6637	11.4009	1.5971	0.446035	1.35665	2556.5	14.9101	2377.6	26.976	2701.61	13.9119	2701.61	13.9119
Yla		375.018	37.6042	13.1087	1.29542	0.509904	0.947894	2687.51	12.2218	2656.22	20.6357	2711.12	14.5658	2711.12	14.5658
Yla		216.196	4.42867	10.7417	1.70739	0.410167	1.35256	2501.04	15.8613	2215.69	25.361	2741.6	17.1376	2741.6	17.1376
Yla		762.605	6.97934	11.5054	3.41045	0.429846	2.23545	2565.02	31.8705	2305.02	43.3224	2777.44	42.2337	2777.44	42.2337
Yla		271.392	4.15563	14.0311	2.10854	0.507234	1.53097	2751.81	19.988	2644.81	33.2136	2831.26	23.6535	2831.26	23.6535
Yla		343.874	0.995164	15.2386	1.56514	0.550228	1.34804	2830.27	14.9146	2826.12	30.8441	2833.22	12.9697	2833.22	12.9697
Yla		246.22	1.03565	12.5187	1.73301	0.450219	1.4379	2644.13	16.2964	2396.22	28.7766	2839.72	15.768	2839.72	15.768
Yla		1491.77	18.6937	15.6135	1.69836	0.558729	1.44926	2853.44	16.2082	2861.38	33.4888	2847.83	14.4265	2847.83	14.4265
Yla		840.058	10.206	13.6592	1.68022	0.481501	1.44107	2726.38	15.8981	2533.8	30.1927	2872.31	14.0412	2872.31	14.0412
Yla		279.567	0.653073	14.1453	1.45431	0.497665	1.14299	2759.5	13.7927	2603.75	24.4842	2875.48	14.6103	2875.48	14.6103
Yla		519.445	4.53549	14.8519	1.62392	0.52232	1.36497	2805.8	15.4501	2709.01	30.1909	2876.11	14.2933	2876.11	14.2933
Yla		628.728	8.72346	14.7574	1.49143	0.516511	1.29243	2799.73	14.1836	2684.36	28.3766	2883.9	12.0838	2883.9	12.0838
Yla		904.924	7.67338	14.7543	1.46817	0.51615	1.23857	2799.53	13.9622	2682.83	27.1816	2884.7	12.7979	2884.7	12.7979
Yla		611.203	2.44393	14.5331	1.76973	0.504131	1.54034	2785.17	16.8142	2631.53	33.281	2898.42	14.1332	2898.42	14.1332
Yla		266.782	3.10073	13.4634	4.11225	0.465694	1.69364	2712.72	38.8872	2464.65	34.6897	2903.05	60.769	2903.05	60.769
Yla		467.759	12.9241	14.132	2.40632	0.487812	2.07527	2758.6	22.8225	2561.2	43.8635	2906.4	19.7426	2906.4	19.7426
Yla		717.984	0.863819	14.9267	2.264	0.512387	1.98475	2810.58	21.5481	2666.81	43.3476	2915.4	17.6407	2915.4	17.6407
Yla		829.502	2.16686	14.6201	1.85928	0.50076	1.59231	2790.84	17.672	2617.06	34.2506	2918.96	15.5414	2918.96	15.5414
Yla		1259.03	81.1109	14.5129	1.62725	0.495491	1.35105	2783.84	15.4589	2594.39	28.8566	2924.17	14.6733	2924.17	14.6733
Yla		153.69	8.1536	14.6808	1.85373	0.497748	1.57815	2794.78	17.6239	2604.11	33.8097	2935.42	15.7185	2935.42	15.7185
Yla		1040.67	27.4401	16.0218	1.89627	0.53598	1.45115	2878.1	18.1251	2766.6	32.6434	2957.07	19.6981	2957.07	19.6981
Yla		175.887	3.57215	18.274	1.96281	0.591637	1.63538	3004.27	18.8982	2996.05	39.1881	3009.76	17.4371	3009.76	17.4371
Yla		646.525	19.9624	16.2992	3.7815	0.522559	1.58183	2894.51	36.1925	2710.02	34.998	3025.48	55.1129	3025.48	55.1129
Yla		292.474	1.47803	15.0542	3.22593	0.480887	2.09116	2818.68	30.7246	2531.13	43.7757	3031.33	39.3899	3031.33	39.3899
Yla		181.246	1.11424	18.3631	2.01484	0.565738	1.5739	3008.95	19.4041	2890.3	36.6603	3089.2	20.0701	3089.2	20.0701
Yla		469.371	5.23431	18.6714	1.31717	0.571269	1.11597	3025	12.6951	2913.03	26.1555	3100.24	11.1508	3100.24	11.1508
Yla		462.423	2.04453	18.2738	1.64577	0.55705	1.47495	3004.26	15.8452	2854.43	34.0166	3106.1	11.6311	3106.1	11.6311
Yla		342.234	2.22279	17.8379	2.37881	0.540079	2.04063	2981.03	22.8757	2783.78	46.1323	3116.93	19.4609	3116.93	19.4609
Yla		425.406	2.66131	18.6992	1.66011	0.563754	1.21369	3026.43	16.0021	2882.12	28.2065	3123.7	18.0242	3123.7	18.0242
Yla		144.504	2.10958	19.1858	1.56763	0.57615	1.37702	3051.2	15.1301	2933.02	32.4488	3129.96	11.9157	3129.96	11.9157
Yla		98.1061	5.63875	20.5058	1.36349	0.611532	1.17452	3115.53	13.2017	3076.13	28.7317	3141	11.0044	3141	11.0044
Yla		1197.14	7.19864	16.2222	2.91057	0.482569	1.88783	2889.98	27.8444	2538.44	39.6124	3145	35.1903	3145	35.1903
Yla		779.716	17.1899	18.1251	1.68155	0.53716	1.51333	2996.4	16.1828	2771.55	34.0911	3150.94	11.6353	3150.94	11.6353
Yla		193.091	1.52726	19.1286	1.57401	0.564928	1.31692	3048.32	15.1894	2886.96	30.6465	3156.46	13.6776	3156.46	13.6776
Yla		99.8011	2.36085	20.1386	1.7023	0.593293	1.36936	3098.04	16.4686	3002.76	32.871	3160.37	16.04	3160.37	16.04
Yla		31.9515	1.21125	21.0718	2.02866	0.615671	1.74563	3141.9	19.6679	3092.67	42.8816	3173.49	16.3814	3173.49	16.3814
Yla		233.224	2.30289	20.5593	1.7724	0.593379	1.25458	3118.05	17.1635	3003.11	30.1186	3192.91	19.8114	3192.91	19.8114
Yla		586.799	3.93423	17.5144	1.82722	0.504139	1.5588	2963.45	17.5529	2631.56	33.6801	3197.16	15.0807	3197.16	15.0807
Yla		163.659	1.37356	19.9731	1.74461	0.574826	1.53332	3090.06	16.8714	2927.61	36.0793	3197.39	13.1644	3197.39	13.1644
Yla		244.439	1.99799	21.3586	1.92655	0.608161	1.71781	3155.01	18.6891	3062.63	41.8782	3214.29	13.7736	3214.29	13.7736
Yla		121.07	1.79337	21.0781	2.44041	0.599406	1.6228	3142.19	23.6614	3027.44	39.2058	3216.31	28.786	3216.31	28.786
Yla		386.279	2.4134	20.565	1.4683	0.584507	1.14453	3118.32	14.2185	2967.11	27.2172	3217.15	14.5218	3217.15	14.5218
Yla		173.495	1.94729	21.4875	1.54256	0.607983	1.28145	3160.85	14.9674	3061.92	31.2344	3224.26	13.55	3224.26	13.55
Yla		173.875	3.83188	19.3428	1.27372	0.547052	0.951238	3059.07	12.2979	2812.9	21.6837	3224.97	13.3655	3224.97	13.3655
Yla		195.444	1.46259	19.2584	1.47741	0.544004	1.17775	3054.85	14.2618	2800.19	26.7503	3226.89	14.0727	3226.89	14.0727
Yla		99.7062	1.0623	22.6802	1.5656	0.637105	1.3532	3213.32	15.2267	3177.63	33.9484	3235.67	12.4177	3235.67	12.4177
Yla		329.012	1.92294	18.3023	1.55358	0.51341	1.36888	3005.76	14.9586	2671.17	29.9361	3237.86	11.5846	3237.86	11.5846
Yla		189.143	0.800078	19.0061	2.8148	0.532833	2.65749	3042.13	27.1588	2753.38	59.5523	3238.81	14.6287	3238.81	14.6287
Yla		193.723	2.00827	22.5432	1.64869	0.631977	1.3592	3207.43	16.0308	3157.4	33.9307	3238.86	14.713	3238.86	14.713
Yla		169.985	1.69293	23.3369	1.34045	0.653678	1.08633	3241.1	13.0522	3242.56	27.682	3240.18	12.3803	3240.18	12.3803
Yla		136.413	0.980938	22.3404	1.53193	0.624676	1.19271	3198.65	14.8896	3128.5	29.5626	3242.93	15.1533	3242.93	15.1533
Yla		130.534	2.14505	22.8812	1.24244	0.639756	1.09106	3221.9	12.0878	3188.06	27.4413	3243.03	9.36767	3243.03	9.36767
Yla		111.989	2.71893	20.778	1.73357	0.580872	1.4356	3128.29	16.7956	2952.31	34.0048	3243.25	15.3162	3243.25	15.3162
Yla		291.36	1.64444	22.3472	1.56389	0.624015	1.36541	3198.94	15.2005	3125.88	33.8212	3245.08	12.0163	3245.08	12.0163
Yla		111.082	4.2136	22.4557	1.64993	0.62599	1.38466	3203.65	16.0402	3133.71	34.3649	3247.73	14.1362	3247.73	14.1362
Yla		240.559	1.58344	22.0727	1.84986	0.615219	1.60335	3186.93	17.971	3090.87	39.3686	3247.97	14.5365	3247.97	14.5365
Yla		157.126	1.40226	23.2611	1.573	0.647282	1.2577	3237.93	15.3148	3217.58	31.8585	3250.55	14.8815	3250.55	14.8815
Yla		109.27	0.87979	23.0223	1.69671	0.640324	1.28093	3227.89	16.5124	3190.29	32.2341	3251.32	17.5261	3251.32	17.5261
Yla		182.198	1.95674	22.6036	1.77394	0.627729	1.48258	3210.03	17.2509	3140.6	36.8578	3253.7	15.3401	3253.7	15.3401
Yla		222.294	2.24436	23.2222	1.79426	0.644737	1.41011	3236.3	17.4682	3207.61	35.6337	3254.12	17.4718	3254.12	17.4718
Yla		562.899	2.10543	18.5511	2.09915	0.514607	1.55366	3018.77	20.2269	2676.27	34.0294	3255.47	22.2224	3255.47	22.2224
Yla		430.513	7.29966	20.9658	3.11345	0.581082	2.21113	3137.01	30.1831	2953.16	52.3872	3256.85	34.5098	3256.85	34.5098
Yla		97.5834	1.68294	19.7196	1.41073	0.546398	1.12841	3077.71	13.6338	2810.17	25.7024	3257.26	13.3295	3257.26	13.3295
Yla		88.9482	0.713197	23.2179	1.77945	0.643277	1.44935	3236.12	17.3239	3201.89	36.5748	3257.39	16.2536	3257.39	16.2536
Yla		184.49	1.41216	23.7625	1.49169	0.658342	1.23365	3258.7	14.5357	3260.72	31.5713	3257.45	13.2021	3257.45	13.2021
Yla		347.216	2.73601	23.6247	1.68829	0.65378	1.48177	3253.03	16.4479	3242.96	37.7622	3259.24	12.7365	3259.24	12.7365
Yla		284.628	2.26952	21.9707	1.33904	0.607818	1.13775	3182.43	13.0052	3061.26	27.727	3259.73	11.114	3259.73	11.114
Yla		237.501	1.63243	22.9899	1.45433	0.63589	1.20963	3226.52	14.1523	3172.84	30.311	3260.04	12.7081	3260.04	12.7081
Yla		142.827	1.65757	18.5779	1.83249	0.513671	1.50694	3020.16	17.6582	2672.28	32.9664	3260.61	16.406	3260.61	16.406
Yla		282.023	1.8685	22.6833	1.21056	0.627092	0.931507	3213.45	11.7734	3138.08	23.1433	3260.84	12.1685	3260.84	12.1685
Yla		160.867	0.681588	22.2404	1.47913	0.613135	1.30411	3194.29	14.3735	3082.54	31.9537	3265.23	10.9759	3265.23	10.9759
Yla		171.468	2.00944	22.7273	1.57409	0.626357	1.35383	3215.34	15.3106	3135.17	33.6117	3265.74	12.6297	3265.74	12.6297
Yla		131.675	0.919816	23.0891	1.74735	0.636219	1.5749	3230.7	17.0073	3174.14	39.4769	3266	11.903	3266	11.903
Yla		302.5	1.67596	21.35	1.3748	0.587618	1.09725	3154.62	13.3357	2979.76	26.1804	3267.83	13.0249	3267.83	13.0249
Yla		239.035	2.23898	22.7988	1.52856	0.627115	1.19384	3218.39	14.8697	3138.17	29.6618	3268.77	15.0105	3268.77	15.0105
Yla		149.449	2.04015	23.5197	1.59673	0.646595	1.32083	3248.69	15.5529	3214.89	33.436	3269.62	14.1067	3269.62	14.1067
Yla		196.449	2.61487	22.8327	1.72484	0.62769	1.42607	3219.84	16.7804	3140.45	35.4516	3269.67	15.256	3269.67	15.256
Yla		89.4473	0.936884	23.4929	1.30106	0.645825	1.09608	3247.58	12.6721	3211.87	27.7264	3269.7	11.0203	3269.7	11.0203
[truncated: 137 more rows]
